# Supplementary material for: A Genome-Wide Association Study Using a Custom Genotyping Array Identifies Variants inGPR158Associated With Reduced Energy Expenditure in American Indians
Source: Oxford University Press journal article supplement (doi:10.2337/db16-1565), 2017-05-05
Supplement: db161565supplementarydata2.xlsx [file db161565supplementarydata2.xlsx]

## Sheet: Sheet1
Chromosome	Position	Variant ID	Location	Gene(s)	Risk allele	Non-risk allele	RAF	Beta	SE	P
13	98016383	rs144506210	intronic	MBNL2	C	T	0.132424	-77.9142	15.6228	6.1263e-07
6	161565641	rs73015431	intronic	AGPAT4	T	G	0.600963	-50.5735	10.4781	1.3888e-06
7	155072197	rs62471607	intergenic	HTR5A,INSIG1	T	C	0.341486	-53.0226	11.2871	2.6318e-06
13	97854600	rs72637434	intergenic	OXGR1,MBNL2	A	G	0.147027	-69.7836	15.0534	3.5567e-06
6	161676694	rs75549799	intronic	AGPAT4	T	C	0.623063	-48.6473	10.6695	5.1281e-06
6	161639071	rs3778228	intronic	AGPAT4	T	C	0.676699	-50.3947	11.0843	5.4544e-06
7	82147302	rs10486963	intergenic	CACNA2D1,PCLO	T	C	0.872795	-66.7137	14.6833	5.533e-06
16	73996607	rs2189609	intergenic	LOC100506172,LOC101928035	C	T	0.651487	-51.2412	11.2866	5.6249e-06
6	161558036	rs7768457	intronic	AGPAT4	G	A	0.685106	-49.0211	10.8466	6.1991e-06
10	25737382	rs4747521	intronic	GPR158	C	T	0.72255	-48.2835	10.7115	6.5561e-06
11	22327542	rs11026499	intergenic	ANO5,SLC17A6	T	C	0.45985	-46.111	10.2506	6.8479e-06
7	82161933	rs11765167	intergenic	CACNA2D1,PCLO	A	G	0.888993	-70.6754	15.7353	7.0719e-06
1	217351406	rs11117784	intergenic	ESRRG,GPATCH2	C	T	0.69164	-47.7873	10.715	8.2011e-06
3	62354425	rs6445264	downstream	FEZF2	A	G	0.877437	-67.4176	15.2457	1e-05
6	161667129	rs4709505	intronic	AGPAT4	A	C	0.663189	-47.9948	10.8472	1e-05
7	32440167	rs57092090	intergenic	PDE1C,LOC100130673	A	G	0.119111	-73.9771	16.8411	1.1e-05
7	155067715	rs4960591	intergenic	HTR5A,INSIG1	A	T	0.598409	-46.5011	10.7555	1.5e-05
22	43518275	rs742134	intronic	BIK	A	G	0.216329	-58.1814	13.4203	1.5e-05
15	66921726	rs61360494	ncRNA_intronic	LINC01169	C	T	0.330467	-46.5578	10.8523	1.8e-05
6	70011226	rs79196172	intronic	BAI3	-	A	0.231481	-52.2581	12.2573	2e-05
5	126998153	rs10519950	intergenic	CTXN3,LINC01184	T	C	0.370752	-45.7063	10.7063	2e-05
3	40626439	rs149791026	intergenic	ZNF621,CTNNB1	-	GAAATTTGGGCCC	0.227151	-50.9231	11.9311	2e-05
16	74007156	rs2663146	intergenic	LOC100506172,LOC101928035	G	A	0.690496	-48.7986	11.4373	2e-05
6	161672998	rs3837010	intronic	AGPAT4	-	T	0.660714	-46.6967	10.9629	2.1e-05
6	69994361	rs10485252	intronic	BAI3	C	T	0.233173	-51.2325	12.1091	2.3e-05
11	22360432	rs77408251	intronic	SLC17A6	T	C	0.530672	-42.8919	10.1247	2.3e-05
4	189373610	rs432038	intergenic	TRIML1,LINC01060	G	A	0.0763481	-81.3818	19.3411	2.6e-05
3	178336583	rs7652385	intronic	KCNMB2	G	T	0.264547	-50.2352	12.0148	2.9e-05
1	109782003	rs611945	intergenic	SARS,CELSR2	A	G	0.560845	-43.2957	10.382	3e-05
14	34426323	rs1680683	intergenic	EGLN3,SPTSSA	G	C	0.320016	-47.3243	11.3532	3.1e-05
1	109740473	rs3818508	intronic	KIAA1324	C	T	0.61487	-44.3485	10.6728	3.2e-05
6	161623546	rs4709500	intronic	AGPAT4	T	C	0.638881	-44.2474	10.6925	3.5e-05
7	32334880	rs215603	intronic	PDE1C	C	T	0.174419	-59.4718	14.3789	3.5e-05
15	66878962	rs4776799	ncRNA_intronic	LINC01169	C	T	0.362871	-42.4288	10.2702	3.6e-05
4	6261776	rs3898050	intergenic	LOC285484,WFS1	G	A	0.869198	-69.2044	16.8007	3.8e-05
9	78589417	rs144856837	intronic	PCSK5	T	C	0.0907877	-87.8833	21.4412	4.1e-05
3	31944640	rs9811517	intronic	OSBPL10	T	C	0.893907	-70.9351	17.3023	4.1e-05
21	16798616	rs34814096	intergenic	NRIP1,USP25	G	T	0.143125	-59.4508	14.5201	4.2e-05
7	154636349	rs2316533	intronic	DPP6	A	G	0.121726	-62.0762	15.2226	4.5e-05
22	47523551	rs80299207	intronic	TBC1D22A	T	C	0.258833	-47.2642	11.59	4.5e-05
14	33942839	rs10150761	intronic	NPAS3	G	T	0.21688	-48.2794	11.8776	4.8e-05
11	22348844	rs10833743	intergenic	ANO5,SLC17A6	A	G	0.526717	-40.7968	10.0753	5.1e-05
22	43473662	rs5759143	intronic	TTLL1	T	C	0.232487	-48.5394	11.9938	5.2e-05
1	109292062	rs61797293	intronic	STXBP3	A	G	0.0511348	-96.1234	23.7783	5.3e-05
2	136988745	rs139116700	intergenic	CXCR4,THSD7B	G	T	0.834184	-55.8835	13.9161	5.9e-05
21	37720313	rs77604347	intronic	MORC3	G	A	0.925634	-78.4337	19.5359	6e-05
7	82159471	rs188493624	intergenic	CACNA2D1,PCLO	T	C	0.935195	-77.1715	19.2458	6.1e-05
18	18633309	rs190167782	intronic	ROCK1	T	C	0.200481	-50.1313	12.5665	6.6e-05
18	18543305	rs200726738	intronic	ROCK1	-	CA	0.201206	-50.1313	12.5665	6.6e-05
18	18555116	rs74567397	intronic	ROCK1	C	G	0.201417	-50.1313	12.5665	6.6e-05
18	18839496	rs147714868	intronic	GREB1L	T	A	0.201159	-50.1312	12.5665	6.6e-05
6	53346755	rs603737	intergenic	ELOVL5,GCLC	A	G	0.334135	-43.5024	10.9376	7e-05
19	53288845	rs10416295	intronic	ZNF600	G	T	0.886412	-59.974	15.0994	7.1e-05
10	77909806	rs7914923	intronic	C10orf11	G	T	0.8	-48.6955	12.3321	7.9e-05
17	12239429	rs2108499	intergenic	MAP2K4,LINC00670	T	A	0.488403	-41.6933	10.564	7.9e-05
6	10383339	rs75312323	intergenic	LOC100506207,TFAP2A	G	A	0.0920631	-74.3557	18.8535	8e-05
22	43505695	rs4988366	intergenic	TTLL1,BIK	G	A	0.209746	-50.9844	12.9477	8.2e-05
X	85587044	rs5968895	intronic	DACH2	A	G	0.786879	-38.5635	9.80082	8.3e-05
1	109789795	rs585362	intergenic	SARS,CELSR2	T	C	0.583847	-41.3275	10.5035	8.3e-05
6	139776028	rs4896457	intergenic	CITED2,LOC645434	C	T	0.458033	-41.8678	10.6424	8.3e-05
4	133540720	rs11099196	intergenic	NONE,PCDH10	G	A	0.078877	-83.791	21.31	8.4e-05
9	96533435	rs2398875	intergenic	PHF2,MIR4291	C	T	0.61869	-42.8077	10.8885	8.4e-05
11	125334328	rs199833958	intronic	FEZ1	-	AGG	0.22411	-47.8875	12.1783	8.4e-05
4	189365317	rs78924794	intergenic	TRIML1,LINC01060	G	A	0.0574099	-84.1497	21.4322	8.6e-05
16	12489524	rs187665996	intronic	SNX29	A	C	0.899287	-63.729	16.2398	8.7e-05
6	161687331	rs73782848	intronic	AGPAT4	A	G	0.556982	-39.774	10.1422	8.8e-05
6	69818593	rs9363983	intronic	BAI3	G	T	0.206731	-48.6551	12.4155	8.9e-05
9	7791360	rs9886801	intergenic	KDM4C,TMEM261	G	A	0.907835	-67.8455	17.3307	9.1e-05
2	26777597	rs4665879	intronic	OTOF	T	C	0.0890374	-66.7547	17.0647	9.2e-05
1	151803449	rs80223568	intronic	RORC	G	T	0.933396	-81.3969	20.8067	9.2e-05
2	56427317	rs56399326	intronic	CCDC85A	G	T	0.513225	-40.3061	10.3335	9.6e-05
17	46065092	rs2525093	intergenic	CDK5RAP3,COPZ2	A	C	0.398557	-42.3439	10.8581	9.6e-05
5	135367057	rs2237064	intronic	TGFBI	G	A	0.113011	-56.3787	14.4586	9.7e-05
9	37047358	---	intergenic	PAX5,EBLN3	T	C	0.0890521	-72.3764	18.579	9.8e-05
9	38207495	rs10973708	intergenic	SHB,ALDH1B1	G	A	0.859828	-57.8135	14.9443	0.00011
7	154631285	rs4960622	intronic	DPP6	G	C	0.242846	-47.9024	12.3826	0.00011
9	16552152	rs79084651	intronic	BNC2	A	G	0.919092	-80.1885	20.7595	0.000112
16	62163291	rs75324376	intergenic	CDH8,NONE	T	C	0.0740048	-76.5035	19.8248	0.000114
16	62196328	rs150650925	intergenic	CDH8,NONE	G	C	0.0735844	-76.5035	19.8248	0.000114
8	39591821	rs201986	intergenic	ADAM18,ADAM2	A	G	0.397082	-40.504	10.5076	0.000116
6	22649421	rs77473219	intergenic	HDGFL1,NRSN1	-	C	0.440797	-38.8946	10.091	0.000116
7	9089610	rs21424	intergenic	NXPH1,PER4	G	A	0.674605	-41.6479	10.8145	0.000118
9	136898627	rs433402	UTR3	BRD3	A	G	0.446868	-40.1117	10.4205	0.000118
15	81740280	rs144200976	intergenic	LOC101929655,MEX3B	AA	-	0.628575	-43.3409	11.2648	0.000119
6	52897017	---	intronic	ICK	G	A	0.925287	-75.0147	19.5136	0.000121
8	96123381	---	intergenic	MIR3150B,PLEKHF2	A	G	0.0678963	-65.0419	16.9271	0.000122
18	70955024	rs72966532	intergenic	LOC400655,LOC100505817	A	G	0.915888	-69.5362	18.1083	0.000123
22	43440253	rs34131658	intronic	TTLL1	-	CA	0.345763	-40.0922	10.4438	0.000124
3	26334751	rs7433957	intergenic	LINC00692,LRRC3B	A	G	0.345044	-39.2639	10.2296	0.000124
18	75593326	rs73969781	intergenic	GALR1,LINC01029	C	T	0.856303	-54.3918	14.1829	0.000125
6	161693897	rs1321849	intronic	AGPAT4	G	T	0.644881	-40.3405	10.5139	0.000125
1	217351732	rs1892260	intergenic	ESRRG,GPATCH2	C	T	0.645867	-40.7213	10.6258	0.000127
6	22648509	rs149916663	intergenic	HDGFL1,NRSN1	-	GTTA	0.447965	-38.6763	10.0898	0.000127
6	22647683	rs1040535	intergenic	HDGFL1,NRSN1	A	G	0.442418	-38.6763	10.0898	0.000127
9	96607015	rs10992921	intergenic	MIR4291,BARX1	T	C	0.68907	-44.6885	11.666	0.000128
6	161551439	rs2293289	UTR3	AGPAT4	A	G	0.670096	-42.2565	11.0424	0.00013
11	121113124	rs141256738	intergenic	TECTA,SC5D	AAGT	-	0.800214	-48.6292	12.7161	0.000131
9	7791820	rs10815679	intergenic	KDM4C,TMEM261	G	A	0.870796	-59.2935	15.5047	0.000131
10	100365906	rs522186	intronic	HPSE2	C	G	0.628342	-42.5392	11.1234	0.000131
1	98727780	rs12751197	ncRNA_intronic	LOC729987	C	A	0.700803	-44.4349	11.6255	0.000132
22	43465814	rs2076155	exonic	TTLL1	G	A	0.181867	-51.0057	13.3638	0.000135
22	43461778	rs6003022	intronic	TTLL1	G	A	0.181636	-51.0057	13.3638	0.000135
10	77778018	rs61862698	intronic	C10orf11	A	G	0.783538	-45.6169	11.9634	0.000137
7	82168867	rs11972597	intergenic	CACNA2D1,PCLO	A	G	0.841972	-52.2042	13.6967	0.000138
6	7526190	rs1324512	intergenic	RIOK1,DSP	T	C	0.634538	-38.9327	10.2202	0.000139
9	7790596	rs36072924	intergenic	KDM4C,TMEM261	A	G	0.883574	-57.9151	15.2004	0.000139
5	60863370	rs7729672	intergenic	ZSWIM6,C5orf64	A	G	0.450721	-38.6759	10.1655	0.000142
9	96594827	---	intergenic	MIR4291,BARX1	TCTATCTATC	-	0.694399	-43.9521	11.561	0.000144
8	5411825	rs75040754	intergenic	CSMD1,LOC100287015	A	G	0.920096	-77.7481	20.4518	0.000144
6	124287672	rs67237625	intronic	NKAIN2	T	C	0.328571	-43.6824	11.4976	0.000145
7	134026821	rs1364423	intergenic	SLC35B4,AKR1B1	T	G	0.893515	-60.3533	15.9007	0.000147
7	154885801	rs146318652	intergenic	HTR5A,INSIG1	G	A	0.138762	-58.1068	15.3182	0.000149
15	96702976	rs2398150	intergenic	LINC00924,NR2F2-AS1	T	G	0.618119	-43.1734	11.3872	0.00015
4	13043594	---	intergenic	HS3ST1,RAB28	G	T	0.86039	-57.414	15.188	0.000157
18	70943380	rs12956222	intergenic	LOC400655,LOC100505817	T	C	0.849332	-54.3393	14.3816	0.000158
18	11075534	rs55813268	intronic	PIEZO2	C	G	0.838542	-52.6894	13.9489	0.000159
8	38782318	rs143924414	intronic	PLEKHA2	G	A	0.790521	-47.4202	12.555	0.000159
1	109706393	rs386603112	intronic	KIAA1324	G	A	0.518058	-39.1292	10.3758	0.000162
16	66485493	rs6499089	intronic	BEAN1	C	T	0.447467	-38.2376	10.1394	0.000162
9	72004046	rs62570212	intronic	FAM189A2	C	T	0.5567	-40.4864	10.756	0.000167
1	9423018	rs12401761	intronic	SPSB1	A	C	0.926221	-72.0861	19.1667	0.000169
11	125620237	rs537969	downstream	PATE1	A	C	0.711028	-43.758	11.6464	0.000172
16	84993353	rs187912333	intergenic	CRISPLD2,ZDHHC7	T	C	0.932888	-88.7536	23.6227	0.000172
1	109784938	rs11102965	intergenic	SARS,CELSR2	C	T	0.497592	-38.2069	10.1773	0.000174
8	5448563	rs78526039	intergenic	CSMD1,LOC100287015	T	C	0.920406	-75.0308	20.0007	0.000176
6	161465297	rs3798911	intronic	MAP3K4	G	A	0.689008	-38.9352	10.3876	0.000178
6	52765565	---	intronic	GSTA3	C	T	0.932407	-74.9827	20.0538	0.000185
2	38994554	rs187592593	intergenic	SRSF7,GEMIN6	C	T	0.809441	-48.5388	12.9832	0.000185
2	38996993	rs148381183	intergenic	SRSF7,GEMIN6	G	A	0.808678	-48.5388	12.9832	0.000185
3	62352677	rs12054355	intergenic	C3orf14,FEZF2	T	G	0.92022	-73.659	19.7068	0.000186
6	156843163	rs2817473	intergenic	NOX3,ARID1B	C	T	0.422276	-38.8622	10.4141	0.00019
1	217355180	rs10863302	intergenic	ESRRG,GPATCH2	C	T	0.663906	-40.2785	10.801	0.000192
9	96430122	rs10992842	intronic	PHF2	G	T	0.161195	-51.4991	13.8203	0.000194
1	195426408	rs2374915	intergenic	NONE,KCNT2	A	G	0.179621	-48.2035	12.9347	0.000194
4	178253289	rs7663521	intronic	NEIL3	C	T	0.877303	-56.5231	15.1658	0.000194
14	76944536	rs7144836	intronic	ESRRB	T	C	0.335605	-39.2939	10.5456	0.000195
12	130267688	rs78402947	intronic	TMEM132D	C	T	0.25615	-44.7339	12.0216	0.000198
11	121113615	rs36087691	intergenic	TECTA,SC5D	-	A	0.652767	-42.3438	11.3998	0.000204
11	70628912	rs10793306	intronic	SHANK2	A	G	0.111942	-67.3102	18.1476	0.000208
17	58886208	rs76910988	intronic	BCAS3	T	A	0.291533	-42.7264	11.5219	0.000209
9	72198823	rs10780537	intronic	APBA1	A	T	0.619925	-39.9437	10.7851	0.000213
13	67532300	rs9571703	intronic	PCDH9	G	C	0.591419	-38.3794	10.3642	0.000213
5	8433010	rs116600526	ncRNA_intronic	LOC729506	A	G	0.0884399	-66.0337	17.8432	0.000215
6	6825940	---	intergenic	LY86,RREB1	A	G	0.0820636	-67.2857	18.1825	0.000215
19	53590594	rs145938077	intronic	ZNF160	C	A	0.919471	-70.7447	19.1247	0.000216
17	4408441	rs35687304	intronic	SPNS2	C	A	0.515362	-38.6827	10.4564	0.000216
6	161557775	rs3734463	intronic	AGPAT4	G	C	0.767258	-44.8112	12.1178	0.000217
4	172866718	rs231586	intronic	GALNTL6	T	C	0.150976	-54.1453	14.6485	0.000219
7	157218781	rs35341055	intergenic	DNAJB6,LOC101927914	A	G	0.0652522	-71.246	19.2768	0.000219
12	130180208	rs10773695	intronic	TMEM132D	T	C	0.426405	-39.2614	10.6246	0.00022
9	34560349	rs4878580	intronic	CNTFR	A	G	0.258547	-43.3531	11.7367	0.000221
12	97792745	rs10777858	intergenic	NEDD1,RMST	T	G	0.796647	-47.0578	12.7422	0.000222
6	37370286	rs2173313	intergenic	RNF8,CMTR1	T	C	0.641921	-39.0027	10.5632	0.000222
4	81740574	rs1021449	intronic	C4orf22	A	G	0.71522	-40.4002	10.9451	0.000223
7	129917130	rs729332	intronic	CPA2	G	A	0.69054	-43.365	11.7518	0.000224
6	40957897	rs114279221	ncRNA_intronic	LOC101929555	G	A	0.912858	-64.3719	17.463	0.000228
14	34275727	rs12589308	intergenic	NPAS3,EGLN3	C	G	0.741181	-44.1167	11.9816	0.000231
17	78260978	rs34200106	intronic	RNF213	-	T	0.709538	-40.1991	10.9191	0.000232
15	81836638	rs12914466	intergenic	LOC101929655,MEX3B	A	G	0.669738	-39.7073	10.7925	0.000234
7	137784687	rs13244061	intronic	AKR1D1	G	A	0.657986	-39.9484	10.8734	0.000239
17	78256045	rs10871506	intronic	RNF213	G	A	0.635926	-38.9907	10.6199	0.000241
9	72199861	rs117088376	intronic	APBA1	G	A	0.674497	-41.9179	11.4167	0.000241
8	67036573	rs7843077	intergenic	DNAJC5B,TRIM55	C	T	0.611007	-39.4103	10.7474	0.000245
12	125202769	rs11057777	intergenic	NCOR2,SCARB1	C	T	0.302136	-39.3663	10.7341	0.000245
10	25740897	rs16925884	intronic	GPR158	T	C	0.585676	-38.3576	10.4608	0.000246
7	87055721	rs45461491	intronic	ABCB4	T	G	0.793426	-43.7087	11.9261	0.000247
14	33945191	rs17101323	intronic	NPAS3	A	C	0.270299	-41.0019	11.1865	0.000247
13	97867450	rs5806005	intergenic	OXGR1,MBNL2	-	ATG	0.216362	-47.0105	12.8281	0.000248
11	117333657	rs11607656	intronic	DSCAML1	G	A	0.578616	-39.4502	10.7697	0.000249
X	85576521	rs1304542	intronic	DACH2	G	A	0.740796	-33.568	9.16756	0.000251
6	85266965	rs17792917	intergenic	CEP162,TBX18	C	T	0.941916	-74.6613	20.3906	0.000251
8	135030176	rs7813412	intergenic	ST3GAL1,ZFAT	G	A	0.111826	-58.1053	15.8749	0.000252
8	103529993	rs111572090	intergenic	UBR5,ODF1	A	-	0.821438	-49.583	13.5458	0.000252
12	125227320	rs1726353	intergenic	NCOR2,SCARB1	G	A	0.470085	-37.3347	10.2013	0.000252
1	108236204	rs12039221	intronic	VAV3	G	C	0.760439	-45.3358	12.3912	0.000253
12	116126411	rs2035587	intergenic	TBX3,MED13L	G	A	0.613563	-37.9584	10.3796	0.000255
4	187519899	rs78045499	intronic	FAT1	-	A	0.192202	-45.624	12.4766	0.000255
6	67096556	rs9294694	intergenic	SLC25A51P1,NONE	A	G	0.862543	-56.1716	15.3624	0.000256
3	61782038	rs9784290	intronic	PTPRG	A	T	0.848371	-52.4319	14.3398	0.000256
1	88186649	rs10923052	intergenic	LINC01364,PKN2-AS1	T	G	0.868592	-54.8504	15.0172	0.00026
1	11936324	rs9661078	intergenic	NPPB,KIAA2013	A	C	0.632262	-39.1481	10.7186	0.00026
1	241051369	rs141438032	intronic	RGS7	G	C	0.197319	-45.021	12.3342	0.000262
2	160298037	rs3836179	intronic	BAZ2B	AA	-	0.931399	-67.0643	18.3787	0.000263
1	195350153	rs12563798	intergenic	NONE,KCNT2	C	T	0.217513	-43.1439	11.8288	0.000265
2	127667403	rs13382758	intergenic	GYPC,BIN1	C	T	0.154813	-54.7388	15.0115	0.000266
8	56090186	rs117830910	intronic	XKR4	C	T	0.924473	-75.6264	20.7436	0.000267
16	12569788	rs150380018	intronic	SNX29	T	G	0.943258	-83.0848	22.8219	0.000272
6	167545072	rs3093015	intronic	CCR6	G	C	0.745774	-44.0063	12.0914	0.000273
11	67843662	rs17597141	intronic	CHKA	C	G	0.171257	-54.1999	14.901	0.000275
18	19149279	rs56043522	intronic	ESCO1	T	C	0.436378	-37.6987	10.3624	0.000275
13	92072346	rs12561118	intronic	GPC5	C	T	0.135052	-54.9651	15.1175	0.000277
7	89519359	rs140331997	ncRNA_intronic	STEAP2-AS1	C	T	0.155357	-57.9447	15.9365	0.000277
9	36900212	rs10814470	intronic	PAX5	G	A	0.887657	-56.6346	15.577	0.000277
4	13067042	rs7440301	intergenic	HS3ST1,RAB28	T	C	0.861252	-56.9204	15.6539	0.000277
5	15709128	rs76254850	intronic	FBXL7	G	A	0.0667379	-69.8767	19.2215	0.000278
6	46415824	rs13209416	intronic	RCAN2	G	C	0.157139	-53.3766	14.693	0.00028
1	195232832	rs185110120	intergenic	CDC73,KCNT2	C	A	0.0832665	-63.7004	17.5529	0.000284
3	61834421	rs117005613	intronic	PTPRG	G	A	0.860978	-55.6876	15.3424	0.000284
3	151804807	rs1382846	intergenic	AADACL2-AS1,MBNL1-AS1	G	A	0.925842	-67.8027	18.6865	0.000285
2	242672761	rs71430378	intergenic	ING5,D2HGDH	C	A	0.614068	-38.3787	10.5831	0.000287
9	16640779	rs77983759	intronic	BNC2	G	A	0.917202	-73.1995	20.1824	0.000287
9	27336985	rs10757653	intronic	MOB3B	C	T	0.480235	-37.7696	10.4228	0.00029
18	77410834	rs182256842	intergenic	NFATC1,CTDP1	T	G	0.0716765	-72.055	19.8963	0.000293
6	161692473	rs4708901	intronic	AGPAT4	A	G	0.600642	-36.6088	10.1089	0.000293
9	96508272	rs75251292	intergenic	PHF2,MIR4291	T	C	0.796098	-46.8085	12.9242	0.000293
10	82607154	rs1911460	intergenic	SH2D4B,NRG3	T	C	0.852084	-52.5361	14.5114	0.000294
6	69797221	rs1482324	intronic	BAI3	C	T	0.162701	-49.0202	13.5393	0.000294
11	121083121	rs56107015	intergenic	TECTA,SC5D	A	G	0.816591	-47.0621	13.0125	0.000298
22	35164206	rs117911777	intergenic	LARGE,ISX	T	C	0.0608812	-81.988	22.6841	0.000301
14	56303505	rs11622054	intergenic	LINC00520,PELI2	C	T	0.677989	-40.1796	11.1248	0.000304
X	108906670	rs184411309	intronic	ACSL4	C	A	0.838034	-41.5347	11.5081	0.000307
4	4846952	rs11285303	intergenic	STX18-AS1,MSX1	-	G	0.286104	-39.4762	10.9378	0.000307
7	82223959	rs1034782	intergenic	CACNA2D1,PCLO	C	G	0.871627	-56.3957	15.6298	0.000308
1	108227361	rs2504458	intronic	VAV3	T	C	0.736505	-43.0415	11.9293	0.000309
6	139773605	rs6570337	intergenic	CITED2,LOC645434	G	C	0.526056	-38.5329	10.6816	0.000309
22	45569845	rs2138156	intronic	NUP50	C	T	0.588283	-37.7728	10.4714	0.000309
17	17215120	rs11078382	intronic	NT5M	G	A	0.830216	-51.4182	14.2554	0.00031
8	38792366	rs66763267	intronic	PLEKHA2	C	T	0.728223	-40.8205	11.3302	0.000315
6	46361409	rs6458501	intronic	RCAN2	T	C	0.347634	-40.6713	11.2994	0.000319
8	5433699	rs2733072	intergenic	CSMD1,LOC100287015	A	G	0.924724	-71.8606	19.976	0.000322
13	107130242	rs34750346	intergenic	LINC00460,EFNB2	G	A	0.760497	-41.0709	11.4217	0.000323
22	45567580	rs132881	intronic	NUP50	A	C	0.439103	-36.6307	10.1913	0.000325
2	140031202	rs736666	intergenic	YY1P2,LRP1B	G	A	0.695874	-38.1461	10.6147	0.000326
17	12470037	rs202131227	ncRNA_intronic	LINC00670	G	-	0.59589	-37.0509	10.309	0.000326
17	13480862	rs9891162	intronic	HS3ST3A1	C	T	0.185714	-44.7153	12.4559	0.000331
7	154626819	rs940834	intronic	DPP6	A	C	0.326285	-41.7308	11.6311	0.000333
2	50653632	---	intronic	NRXN1	G	C	0.0520193	-84.0622	23.4319	0.000334
4	187497695	rs6854936	intergenic	MTNR1A,FAT1	C	T	0.192616	-44.7234	12.4669	0.000334
9	38535598	rs80106023	intergenic	IGFBPL1,FAM95C	T	C	0.343158	-41.7802	11.6498	0.000335
8	2205343	rs4876192	intergenic	MYOM2,CSMD1	G	A	0.229986	-42.5509	11.8667	0.000336
1	168726317	rs2786758	intergenic	DPT,LINC00626	A	G	0.859129	-55.3941	15.447	0.000336
6	69835704	rs2343257	intronic	BAI3	C	T	0.188536	-46.4377	12.9564	0.000338
9	71035452	rs11142179	intronic	PGM5	C	T	0.598076	-36.6375	10.2222	0.000338
2	56430903	rs4672097	intronic	CCDC85A	A	G	0.448828	-36.5284	10.1941	0.000339
13	47305954	rs116960635	intronic	LRCH1	G	C	0.191825	-48.2498	13.468	0.00034
4	164085735	rs3839199	intronic	NAF1	-	AGC	0.325764	-39.1528	10.9469	0.000348
7	32429488	rs12538364	intergenic	PDE1C,LOC100130673	T	C	0.141651	-54.9261	15.3591	0.000349
9	83714890	rs4390020	intergenic	LOC101927477,TLE1	T	C	0.180433	-48.3033	13.5176	0.000352
12	1371969	rs2286034	intronic	ERC1	A	G	0.911828	-55.0695	15.4295	0.000358
6	161679188	rs12662114	intronic	AGPAT4	T	C	0.750869	-42.951	12.0368	0.000359
18	74346279	rs11874188	ncRNA_intronic	LOC101927651	G	T	0.444608	-39.675	11.1235	0.000361
1	110300277	rs11102002	intronic	EPS8L3	T	C	0.287936	-44.7606	12.5638	0.000367
11	22303068	rs35692634	UTR3	ANO5	-	A	0.542926	-36.1642	10.1567	0.00037
16	74016752	rs2905984	intergenic	LOC100506172,LOC101928035	T	G	0.72145	-42.3157	11.8846	0.00037
17	12475046	---	ncRNA_intronic	LINC00670	TTCT	-	0.601817	-36.5788	10.2746	0.000371
3	178319253	rs1477773	intronic	KCNMB2	C	T	0.371192	-37.8222	10.6336	0.000375
2	240757918	rs13009732	intergenic	LOC150935,MIR4786	C	T	0.647459	-39.1637	11.0127	0.000376
4	13033098	rs977031	intergenic	HS3ST1,RAB28	C	A	0.825361	-51.1529	14.3864	0.000377
13	47253221	rs842364	intronic	LRCH1	T	G	0.71763	-39.6338	11.1545	0.000381
3	62207223	rs34971432	intronic	PTPRG	C	A	0.920473	-68.5502	19.2985	0.000382
1	195378748	rs71837045	intergenic	NONE,KCNT2	-	CT	0.21844	-42.129	11.8669	0.000385
4	96828109	rs6532586	intergenic	PDHA2,STPG2-AS1	G	A	0.197755	-44.2649	12.4756	0.000388
7	86593322	rs4727130	intronic	KIAA1324L	T	C	0.718158	-41.7034	11.7533	0.000388
9	22133645	rs10217762	intergenic	CDKN2B-AS1,DMRTA1	C	T	0.394251	-35.9389	10.1318	0.000389
15	66924801	rs4351998	ncRNA_intronic	LINC01169	G	A	0.394681	-36.6171	10.3282	0.000392
14	58495433	rs56145805	intronic	C14orf37	A	G	0.46936	-37.2355	10.5048	0.000393
9	7514184	rs62532966	intergenic	KDM4C,TMEM261	C	A	0.69828	-41.5284	11.7152	0.000393
2	72302190	rs28464218	intergenic	DYSF,CYP26B1	G	A	0.780291	-45.9488	12.9663	0.000394
7	32399658	rs215702	intergenic	PDE1C,LOC100130673	G	A	0.173587	-49.319	13.9243	0.000397
14	25509607	rs79774600	intronic	STXBP6	G	A	0.2934	-41.3601	11.6898	0.000403
10	134524979	rs61531966	intronic	INPP5A	GTG	-	0.605559	-37.2956	10.5477	0.000406
11	125657708	rs513984	upstream	PATE3	C	A	0.643125	-39.7117	11.2302	0.000406
6	161521039	rs12528950	intronic	MAP3K4	G	A	0.75822	-40.7942	11.5355	0.000406
9	6858433	rs7022922	intronic	KDM4C	C	T	0.893506	-60.1997	17.0317	0.000408
11	70735752	rs71469408	intronic	SHANK2	G	A	0.918692	-76.9016	21.7619	0.00041
3	178321439	rs10212362	intronic	KCNMB2	A	G	0.592355	-37.4571	10.6017	0.000411
11	22301807	rs10766930	UTR3	ANO5	G	A	0.543717	-35.831	10.1434	0.000412
3	46320360	rs79964203	intergenic	CCR3,CCR2	A	G	0.0802354	-67.6964	19.1763	0.000415
14	34276036	rs61708913	intergenic	NPAS3,EGLN3	A	G	0.664841	-40.1027	11.3615	0.000416
13	67745848	rs9541027	intronic	PCDH9	T	C	0.615477	-37.6061	10.6673	0.000423
17	12482543	rs4792264	ncRNA_intronic	LINC00670	A	G	0.58774	-35.8471	10.172	0.000425
4	187560813	rs77346323	intronic	FAT1	-	G	0.36476	-37.6487	10.6849	0.000426
4	139767497	rs2135290	intergenic	LINC00499,CCRN4L	C	T	0.531551	-35.6013	10.1083	0.000428
11	56921505	---	intergenic	OR5AK4P,LRRC55	G	A	0.0945513	-64.6998	18.3739	0.000429
18	70945083	rs12457764	intergenic	LOC400655,LOC100505817	T	C	0.78965	-44.8563	12.7438	0.000432
18	18877014	rs4377239	intronic	GREB1L	T	C	0.434428	-36.6137	10.4047	0.000433
2	15808935	rs876718	intergenic	DDX1,LOC101926966	G	A	0.708726	-38.893	11.0524	0.000433
10	61683790	rs10821612	intergenic	CCDC6,C10orf40	T	C	0.065793	-69.9549	19.8886	0.000436
5	173559269	rs76731565	intergenic	HMP19,MSX2	G	A	0.0856265	-56.1602	15.9728	0.000438
10	23833623	rs4387257	intergenic	OTUD1,KIAA1217	T	G	0.0561497	-82.7078	23.5328	0.00044
10	66465095	rs10822337	intergenic	REEP3,ANXA2P3	T	C	0.45384	-37.7968	10.7668	0.000447
19	47313120	rs45463298	intergenic	SLC1A5,SNAR-E	A	G	0.298743	-39.515	11.2587	0.000449
8	117750796	rs11393684	intronic	EIF3H	-	T	0.224853	-44.6126	12.7123	0.000449
6	41053946	rs10712220	intronic	NFYA	A	-	0.923457	-68.6933	19.5813	0.000451
1	108307636	rs12735293	intronic	VAV3	C	G	0.11899	-52.3548	14.924	0.000451
15	29625717	rs11639447	intronic	FAM189A1	C	T	0.891827	-56.4574	16.1036	0.000455
11	89213237	rs7939071	intronic	NOX4	A	T	0.134104	-53.2965	15.2077	0.000457
8	103526123	rs79658122	intergenic	UBR5,ODF1	T	C	0.821687	-47.5319	13.5652	0.000458
10	134378502	rs79584719	intronic	INPP5A	A	G	0.491841	-35.8513	10.23	0.000458
15	79510909	rs4779012	ncRNA_intronic	LOC729911	A	C	0.15004	-45.7994	13.0727	0.000459
1	32114444	---	intergenic	PEF1,COL16A1	G	T	0.938641	-78.5412	22.4219	0.00046
9	22138762	rs4977761	intergenic	CDKN2B-AS1,DMRTA1	C	T	0.397995	-35.3801	10.1062	0.000464
7	117349938	rs35610850	downstream	CTTNBP2	C	T	0.0797199	-71.4967	20.4284	0.000465
5	127147547	rs790480	intergenic	CTXN3,LINC01184	C	T	0.530975	-35.7412	10.2127	0.000466
3	30585840	rs78339059	intergenic	RBMS3,TGFBR2	C	T	0.128591	-56.4655	16.1358	0.000466
7	32291301	rs6955990	intronic	PDE1C	G	A	0.139861	-54.1118	15.4653	0.000467
11	1828092	rs6578830	intergenic	CTSD,SYT8	C	T	0.828683	-50.6591	14.4794	0.000467
10	80656358	rs509651	intergenic	LINC00595,ZMIZ1-AS1	G	T	0.111719	-55.9157	15.9854	0.000469
17	17183974	rs117743490	UTR5	COPS3	A	C	0.865847	-55.0229	15.7391	0.000472
6	53149262	rs1346603	intronic	ELOVL5	T	C	0.40948	-36.2993	10.3819	0.000472
2	56433956	rs17190072	intronic	CCDC85A	C	T	0.527547	-35.5491	10.1697	0.000473
18	19365697	rs77428116	intronic	MIB1	A	C	0.180511	-45.7923	13.1074	0.000476
13	107041123	rs72656428	intergenic	LINC00460,EFNB2	G	A	0.671218	-36.7796	10.5265	0.000476
13	37330830	rs7991888	intergenic	SERTM1,RFXAP	A	G	0.366408	-39.8168	11.3989	0.000478
4	187540635	rs77834784	exonic	FAT1	G	T	0.366167	-37.4663	10.726	0.000478
1	155300725	rs147529980	UTR3	RUSC1	A	G	0.0665064	-77.1156	22.0908	0.000481
6	7535715	rs768190	intergenic	RIOK1,DSP	T	C	0.584825	-35.0765	10.0507	0.000483
12	105138132	rs112797720	intronic	CHST11	G	C	0.63011	-38.814	11.1205	0.000483
22	43639138	rs998409	intronic	SCUBE1	G	A	0.549279	-35.4478	10.164	0.000487
12	50243672	rs7299134	intergenic	BCDIN3D,FAIM2	A	G	0.85016	-45.9453	13.1728	0.000487
7	87101407	rs4148812	intronic	ABCB4	C	G	0.590078	-38.4467	11.0289	0.00049
1	18654584	rs6683529	intronic	IGSF21	A	G	0.0953526	-57.0184	16.3623	0.000493
8	2321794	rs17754403	intergenic	MYOM2,CSMD1	A	G	0.253472	-40.7779	11.7032	0.000493
2	235347442	rs59956479	intergenic	SPP2,ARL4C	G	A	0.655339	-37.9707	10.898	0.000494
12	118202925	rs1969121	intronic	KSR2	G	A	0.54482	-38.5884	11.0789	0.000496
8	67024987	rs34645072	intergenic	DNAJC5B,TRIM55	C	-	0.613351	-37.5092	10.7713	0.000497
17	25823377	rs9303652	intronic	KSR1	C	T	0.16631	-48.09	13.8153	0.0005
22	49636011	---	intergenic	LINC01310,NONE	G	A	0.93308	-76.4681	21.9736	0.000501
6	7506490	rs2806181	intergenic	RIOK1,DSP	T	C	0.665732	-35.972	10.343	0.000505
10	80655050	rs772838	intergenic	LINC00595,ZMIZ1-AS1	A	G	0.0911396	-66.8497	19.2207	0.000505
6	161410978	rs610638	intergenic	PLG,MAP3K4	C	A	0.755484	-40.1162	11.5363	0.000506
3	150579321	rs62282709	intergenic	SIAH2,CLRN1	A	G	0.832087	-45.3517	13.0472	0.000509
8	39177813	rs10097489	ncRNA_intronic	ADAM5	T	C	0.520465	-35.2676	10.1456	0.000509
4	27226840	rs35327522	intergenic	STIM2,MIR4275	T	G	0.589987	-36.9215	10.6248	0.000511
1	195535616	rs147874508	intergenic	NONE,KCNT2	A	G	0.140988	-48.6583	14.0057	0.000512
9	28521651	rs10968638	intronic	LINGO2	G	A	0.856111	-49.2585	14.1767	0.000512
5	91794720	rs10052539	intergenic	ARRDC3-AS1,NR2F1-AS1	T	G	0.106409	-56.589	16.307	0.00052
11	118691224	---	intergenic	DDX6,CXCR5	A	C	0.0548585	-87.4587	25.21	0.000522
12	13382117	rs11055295	intergenic	EMP1,C12orf36	C	T	0.519587	-34.7704	10.0252	0.000524
2	50820091	rs13000907	intronic	NRXN1	A	C	0.470353	-36.0433	10.3941	0.000525
22	47529458	rs13055207	intronic	TBC1D22A	A	G	0.360369	-37.6336	10.8527	0.000525
17	32155768	---	intronic	ASIC2	G	T	0.112209	-56.821	16.3934	0.000528
7	32431170	---	intergenic	PDE1C,LOC100130673	G	C	0.0797276	-73.089	21.0896	0.000529
9	38215336	rs34982540	intergenic	SHB,ALDH1B1	-	T	0.854929	-49.1197	14.1738	0.000529
1	181831313	rs508270	intergenic	CACNA1E,ZNF648	C	G	0.109782	-61.3854	17.7162	0.00053
9	115617291	rs10481671	intronic	SNX30	A	G	0.436961	-36.7449	10.6084	0.000533
9	88094603	rs11140988	intergenic	NTRK2,AGTPBP1	A	G	0.936815	-71.8724	20.757	0.000535
10	77900054	rs1898108	intronic	C10orf11	T	G	0.668228	-37.2683	10.7639	0.000535
17	59455391	---	intronic	BCAS3	G	C	0.106446	-62.1099	17.9377	0.000535
17	59455577	---	intronic	BCAS3	C	G	0.105947	-62.1099	17.9377	0.000535
2	22497603	rs56215556	intergenic	LOC645949,LOC102723362	G	A	0.253685	-40.1597	11.6032	0.000538
3	46447888	rs151064806	upstream	CCRL2	A	G	0.0860918	-61.5311	17.7808	0.000539
7	89678695	rs4728860	ncRNA_intronic	STEAP2-AS1	T	C	0.177876	-49.7221	14.3762	0.000543
8	65846246	rs4737689	intergenic	CYP7B1,LINC00251	T	C	0.739904	-40.3281	11.6598	0.000543
10	107868926	---	intergenic	LOC101927549,SORCS1	T	C	0.230614	-41.8501	12.1051	0.000546
9	96562171	rs10821223	intergenic	PHF2,MIR4291	T	C	0.597646	-37.1254	10.7413	0.000548
2	191234995	rs4853696	intronic	INPP1	T	C	0.936601	-74.1101	21.4472	0.000549
6	132860713	rs2842897	downstream	TAAR9	C	T	0.830615	-48.0802	13.9159	0.00055
9	25659418	rs10967030	intergenic	IZUMO3,TUSC1	C	T	0.867421	-51.7662	14.9932	0.000555
7	144669690	rs10268248	intergenic	TPK1,CNTNAP2	G	A	0.751474	-40.8883	11.8463	0.000557
17	67729221	rs2012628	ncRNA_intronic	LOC101928122	G	A	0.300161	-38.3294	11.1056	0.000558
8	6828647	rs2615767	intergenic	DEFA10P,DEFA1	T	C	0.9164	-64.3965	18.6639	0.00056
8	39192481	rs13252535	ncRNA_intronic	ADAM5	G	A	0.35636	-35.8669	10.3958	0.00056
7	32394858	rs215692	intergenic	PDE1C,LOC100130673	T	C	0.19992	-45.7537	13.2604	0.00056
7	32305274	rs7780515	intronic	PDE1C	T	C	0.177061	-48.7752	14.1375	0.000561
15	82429837	rs2654222	intronic	EFTUD1	A	G	0.462022	-35.6287	10.3288	0.000562
2	127644785	rs10928992	intergenic	GYPC,BIN1	G	A	0.161191	-49.0659	14.2249	0.000562
14	21362657	rs148320273	intergenic	RNASE3,ECRP	T	A	0.161299	-49.4065	14.3393	0.00057
4	6259888	rs4380588	intergenic	LOC285484,WFS1	G	A	0.858707	-57.7772	16.7695	0.00057
8	5413325	rs4875580	intergenic	CSMD1,LOC100287015	A	C	0.592731	-37.5999	10.9128	0.00057
5	15420559	rs17647121	intergenic	LOC101929454,FBXL7	C	T	0.0695594	-66.657	19.3494	0.000571
11	1828941	rs7942309	intergenic	CTSD,SYT8	G	A	0.862216	-54.0463	15.6897	0.000572
11	117336280	rs544153	intronic	DSCAML1	A	G	0.387239	-36.518	10.6095	0.000577
4	125556414	rs34425216	intergenic	LOC101927087,ANKRD50	-	T	0.266381	-40.0596	11.6449	0.000581
21	15964119	rs456811	ncRNA_UTR3	LOC388813	G	A	0.171746	-47.5013	13.818	0.000587
21	17807929	rs2823792	ncRNA_intronic	LINC00478	A	G	0.122863	-53.8125	15.6628	0.000591
2	50540740	rs939425	intronic	NRXN1	C	T	0.546608	-36.6128	10.6622	0.000595
14	33304967	rs146597939	intergenic	AKAP6,NPAS3	-	TTTC	0.385745	-36.1205	10.5193	0.000595
14	33305499	rs12896446	intergenic	AKAP6,NPAS3	G	T	0.386024	-36.1204	10.5193	0.000595
19	44204340	rs2307689	intergenic	PLAUR,IRGC	TTC	-	0.76729	-40.9791	11.9339	0.000595
22	27730856	rs56180817	intergenic	LINC01422,MN1	G	C	0.632325	-37.4371	10.9057	0.000597
5	31557241	rs4867070	intergenic	C5orf22,PDZD2	T	C	0.130086	-49.7538	14.498	0.0006
7	114566565	rs77336725	intronic	MDFIC	T	C	0.196201	-45.2053	13.1749	0.000601
19	29930394	rs73020505	ncRNA_intronic	LOC284395	T	C	0.161812	-48.86	14.2417	0.000602
12	56814256	---	intronic	TIMELESS	GAT	-	0.420448	-34.4675	10.0461	0.000602
16	62642846	rs2911283	intergenic	CDH8,NONE	A	G	0.135439	-48.147	14.0376	0.000604
12	56597804	rs12427225	UTR3	RNF41	G	A	0.144941	-46.931	13.6874	0.000606
5	127152634	rs711360	intergenic	CTXN3,LINC01184	G	A	0.412189	-35.7069	10.4128	0.000606
14	56315109	rs17128869	intergenic	LINC00520,PELI2	C	T	0.5207	-35.2217	10.2767	0.00061
20	55387426	rs186099131	intergenic	TFAP2C,BMP7	A	G	0.930326	-71.2882	20.8026	0.000611
3	178341582	rs386555185	intronic	KCNMB2	A	G	0.556001	-38.1126	11.1228	0.000611
6	161529558	rs12195182	intronic	MAP3K4	C	G	0.723499	-40.9959	11.966	0.000612
10	77729499	rs140811393	intronic	C10orf11	-	T	0.333423	-36.7065	10.7143	0.000613
13	46750395	rs61949182	intronic	LCP1	C	T	0.497991	-35.5104	10.3697	0.000616
2	26792134	rs751652	intronic	C2orf70	C	T	0.0662216	-66.6484	19.4629	0.000616
5	128283017	rs6890670	intergenic	FBN2,SLC27A6	A	C	0.679354	-37.518	10.956	0.000616
10	10862649	rs10128481	intergenic	SFTA1P,LINC00710	T	C	0.283744	-38.237	11.1669	0.000617
22	23711467	rs116319124	ncRNA_intronic	CES5AP1	A	G	0.253207	-38.8335	11.3454	0.00062
15	66878900	rs2245586	ncRNA_intronic	LINC01169	A	G	0.0633013	-79.7126	23.2937	0.000621
10	130497948	rs79736363	intergenic	LINC01163,MGMT	A	G	0.899306	-56.6347	16.5551	0.000624
9	72838445	rs35473979	ncRNA_intronic	SMC5-AS1	A	G	0.775755	-40.1188	11.7309	0.000626
17	36592405	rs12949691	intronic	ARHGAP23	C	T	0.839257	-45.9934	13.4497	0.000627
19	51256051	rs1560093	intergenic	CLEC11A,GPR32	G	C	0.74031	-38.6347	11.2991	0.000628
2	209736883	rs12467529	intergenic	PTH2R,MAP2	A	G	0.56574	-35.9845	10.5288	0.000632
9	83547427	rs3886111	intergenic	LOC101927477,TLE1	A	G	0.408581	-33.4266	9.78389	0.000634
1	1261133	rs3813208	intronic	CPTP	T	G	0.292693	-38.0344	11.1364	0.000637
3	178324276	rs200818574	intronic	KCNMB2	G	T	0.282766	-40.4858	11.8541	0.000637
2	96691204	---	intronic	GPAT2	G	T	0.94068	-73.7452	21.5988	0.000639
16	66912706	---	intergenic	CA7,PDP2	T	C	0.26244	-38.1543	11.1749	0.000639
22	17403936	rs2011716	intergenic	HSFY1P1,GAB4	C	G	0.108144	-57.5172	16.8459	0.000639
7	82224083	rs1034783	intergenic	CACNA2D1,PCLO	C	T	0.901469	-59.3304	17.3775	0.00064
7	86714024	rs12704345	intergenic	KIAA1324L,DMTF1	T	G	0.611513	-36.3507	10.6512	0.000643
11	117469851	rs11274556	intronic	DSCAML1	AGAAATCTTTTCTTAGT	-	0.467656	-36.9222	10.8182	0.000643
2	28816116	rs77543953	intronic	PLB1	A	G	0.0742323	-66.6736	19.5363	0.000643
17	53699432	---	intergenic	MMD,TMEM100	G	A	0.151349	-52.0813	15.2614	0.000643
17	53682302	rs34803063	intergenic	MMD,TMEM100	T	C	0.151616	-52.0813	15.2614	0.000643
5	127225607	rs245170	intergenic	CTXN3,LINC01184	A	G	0.445009	-35.1737	10.312	0.000647
5	127229732	rs35210017	intergenic	CTXN3,LINC01184	T	-	0.444504	-35.1737	10.312	0.000647
20	11993194	rs143550482	intergenic	BTBD3,LOC101929486	G	A	0.892972	-57.5767	16.8797	0.000647
9	36481987	rs7044752	intergenic	RNF38,MELK	A	C	0.791199	-42.583	12.4865	0.000649
13	109085932	rs138014371	intergenic	TNFSF13B,MYO16	A	-	0.774003	-39.9359	11.7099	0.000649
1	17492052	rs55667496	intergenic	PADI2,PADI1	A	G	0.756019	-40.7464	11.9498	0.00065
5	163018061	rs294582	intergenic	MAT2B,LOC101927835	T	C	0.148133	-45.2513	13.2728	0.000651
11	125721971	rs12421710	intergenic	PATE4,HYLS1	T	C	0.540762	-37.1454	10.9062	0.00066
5	31384055	rs4050128	intergenic	CDH6,DROSHA	G	A	0.286364	-40.0038	11.7459	0.00066
5	31378267	rs13189393	intergenic	CDH6,DROSHA	T	C	0.285619	-40.0038	11.7459	0.00066
22	37679671	rs1041894	intronic	CYTH4	C	T	0.563938	-35.0038	10.2846	0.000665
1	109765795	rs12125002	intronic	SARS	G	A	0.550195	-35.4947	10.4311	0.000667
14	22942890	rs2254272	intergenic	OR4E2,DAD1	G	T	0.186782	-46.3535	13.6223	0.000667
1	108332317	rs145358260	intronic	VAV3	C	T	0.117749	-51.092	15.0144	0.000667
12	125209984	---	intergenic	NCOR2,SCARB1	G	A	0.401393	-34.6167	10.1776	0.000671
22	37679390	rs4821625	intronic	CYTH4	T	A	0.416285	-34.9911	10.2883	0.000671
3	154896076	rs3773872	intronic	MME	G	A	0.106522	-53.1941	15.6518	0.000677
18	19476977	rs55714019	intergenic	MIB1,GATA6-AS1	C	G	0.267905	-37.7514	11.1078	0.000677
4	138673754	rs12509546	intergenic	PCDH18,LINC00616	T	C	0.376305	-37.2169	10.9525	0.000679
20	19614510	rs183630739	intronic	SLC24A3	A	C	0.824328	-46.5809	13.7104	0.00068
21	40273464	rs77822150	ncRNA_intronic	LOC400867	G	T	0.084825	-60.3757	17.7749	0.000682
4	88499287	rs183079520	intergenic	SPARCL1,DSPP	G	C	0.885252	-54.9972	16.1954	0.000684
2	142701729	---	intronic	LRP1B	A	G	0.0639519	-71.4595	21.0501	0.000687
8	117785293	rs3842630	UTR3	UTP23	-	TTCTCATTTG	0.220974	-43.2271	12.7358	0.000688
13	20956834	rs4335644	intergenic	GJB6,CRYL1	A	G	0.70704	-37.6341	11.0872	0.000688
6	11798414	rs4713925	intergenic	ADTRP,HIVEP1	T	C	0.53953	-34.8795	10.276	0.000688
10	78175033	rs1907345	intronic	C10orf11	T	C	0.104378	-54.2157	15.976	0.00069
3	179594633	rs35130517	intronic	PEX5L	-	T	0.257821	-39.6466	11.6875	0.000693
14	93459613	rs117059980	intronic	ITPK1	G	A	0.199251	-44.4818	13.1134	0.000694
20	626081	rs6116929	intergenic	TCF15,SRXN1	G	A	0.717699	-38.1715	11.2539	0.000694
15	98965405	rs8029811	intergenic	LOC101927332,FAM169B	C	A	0.127003	-52.5177	15.4844	0.000695
10	14085561	---	intronic	FRMD4A	A	C	0.0845598	-59.8696	17.6521	0.000695
7	133598288	rs13228262	intronic	EXOC4	A	G	0.874766	-53.7224	15.8519	0.000701
4	81540467	rs144600519	intronic	C4orf22	T	C	0.902183	-57.9513	17.1017	0.000702
1	52256359	rs41293251	intronic	NRD1	G	A	0.335558	-36.7738	10.855	0.000705
6	14133573	rs9382940	intronic	CD83	T	C	0.413765	-34.6994	10.2443	0.000706
7	157152716	rs143193495	intronic	DNAJB6	C	G	0.0812867	-59.6843	17.624	0.000708
22	49550630	rs5769434	intergenic	LINC01310,NONE	T	C	0.868767	-52.6068	15.538	0.00071
12	13368311	rs139693731	UTR3	EMP1	G	A	0.622631	-36.3772	10.7464	0.000712
14	56295985	rs56272096	intergenic	LINC00520,PELI2	T	-	0.688619	-36.4867	10.7788	0.000712
17	55839058	rs11871658	intergenic	CCDC182,MRPS23	A	G	0.262975	-40.2419	11.8931	0.000715
6	72705949	rs4706499	intronic	RIMS1	C	T	0.647475	-37.3142	11.0291	0.000716
8	4590057	rs13255293	intronic	CSMD1	T	C	0.141176	-50.9192	15.0573	0.00072
5	128674596	rs7702810	intergenic	ISOC1,MIR4460	C	A	0.0522448	-79.7441	23.5889	0.000723
11	125349317	rs76837351	intronic	FEZ1	C	T	0.863332	-49.3716	14.6043	0.000723
3	93682544	rs62832761	intronic	PROS1	-	AGA	0.417143	-36.841	10.899	0.000724
11	96655901	rs80125710	intergenic	JRKL-AS1,MIR7976	C	T	0.156986	-48.676	14.4023	0.000726
15	64256930	rs34973418	intronic	DAPK2	C	T	0.904036	-65.1752	19.2901	0.000728
10	61618789	rs10994058	intronic	CCDC6	G	T	0.064654	-68.607	20.3045	0.000728
14	98780508	rs141142335	intergenic	C14orf64,C14orf177	G	T	0.169204	-46.0046	13.6162	0.000728
6	46347447	rs141241444	intronic	RCAN2	G	A	0.801763	-42.8852	12.6936	0.000729
20	17904680	rs6045098	intergenic	BANF2,SNX5	G	A	0.0688961	-66.0246	19.5422	0.000729
3	169234203	rs7616087	intronic	MECOM	T	C	0.350644	-35.8585	10.6143	0.000729
8	2289639	rs35255794	intergenic	MYOM2,CSMD1	-	GAGT	0.312533	-36.8174	10.9001	0.000731
7	87783166	rs10487009	intronic	ADAM22	A	G	0.519534	-34.4886	10.2137	0.000734
22	33145685	rs4821092	intronic	SYN3	C	T	0.298051	-37.3646	11.0678	0.000736
2	142892706	---	intergenic	LRP1B,KYNU	G	C	0.0610769	-71.5526	21.2031	0.000739
1	168742931	rs2786768	intergenic	DPT,LINC00626	G	A	0.826255	-45.0051	13.3365	0.000739
4	6256911	rs4440299	intergenic	LOC285484,WFS1	T	G	0.87955	-58.6628	17.3829	0.000739
7	7890115	rs34915489	ncRNA_intronic	RPA3OS	T	C	0.518459	-34.5633	10.2439	0.000741
1	18646833	rs34977403	intronic	IGSF21	-	CAGT	0.095495	-55.6999	16.5195	0.000747
14	40341369	rs12897262	intergenic	FBXO33,LOC644919	C	T	0.106113	-56.6161	16.7933	0.000748
17	62851673	---	intronic	LRRC37A3	-	GTAA	0.258931	-41.5032	12.31	0.000748
15	97972260	rs4641721	ncRNA_intronic	LOC101927286	A	G	0.300053	-38.809	11.5119	0.000748
2	31211295	rs60597389	intronic	GALNT14	A	G	0.394118	-35.075	10.4096	0.000753
16	75965028	rs191659677	intergenic	TERF2IP,CNTNAP4	C	T	0.942823	-76.7229	22.7751	0.000755
20	19387476	rs7264831	intronic	SLC24A3	T	C	0.832443	-46.132	13.6968	0.000757
2	50677857	---	intronic	NRXN1	G	C	0.0522448	-80.0746	23.7755	0.000757
21	18059112	rs56962002	intergenic	LINC00478,C21orf37	-	CAT	0.466747	-34.9609	10.3802	0.000757
3	40885879	rs627998	intergenic	ZNF621,CTNNB1	T	C	0.561598	-35.095	10.42	0.000757
16	54762673	rs139297387	intergenic	IRX3,CRNDE	G	-	0.199036	-45.2989	13.4513	0.000758
7	155721381	rs11767439	intergenic	SHH,LOC389602	C	T	0.878646	-60.0498	17.8306	0.000758
9	7497427	rs10119450	intergenic	KDM4C,TMEM261	A	C	0.406818	-37.3802	11.1102	0.000767
4	139787169	rs140388754	intergenic	LINC00499,CCRN4L	A	G	0.199251	-41.4889	12.3329	0.000768
20	4071940	rs34969280	intergenic	RNF24,SMOX	G	A	0.703555	-36.7853	10.9344	0.000768
16	59735337	rs10500416	intergenic	GOT2,APOOP5	G	A	0.92284	-66.0981	19.6522	0.00077
4	125601254	rs17008478	intronic	ANKRD50	C	T	0.265901	-39.455	11.7317	0.000771
4	125621766	rs150394673	intronic	ANKRD50	-	AATT	0.265767	-39.455	11.7317	0.000771
5	116018750	rs12517484	intergenic	SEMA6A,LOC102467223	G	C	0.447087	-35.6315	10.5951	0.000771
6	41068258	rs147185322	UTR3	NFYA	A	-	0.924906	-67.6098	20.1033	0.000771
8	39197783	rs11996111	ncRNA_intronic	ADAM5	G	A	0.364039	-34.5952	10.2918	0.000775
X	116265644	rs2840754	intergenic	CT83,KLHL13	A	G	0.76664	-32.4933	9.66629	0.000775
19	7901160	rs569175	intronic	EVI5L	T	G	0.209535	-44.9048	13.3614	0.000777
7	43561814	rs10487674	ncRNA_intronic	LOC100506895	C	T	0.168581	-45.4498	13.5296	0.000781
6	159556422	---	intergenic	TAGAP,LOC101929122	C	T	0.0795455	-59.8545	17.8168	0.000781
12	41459857	rs117243315	intronic	CNTN1	T	C	0.449839	-35.4727	10.561	0.000783
4	13024822	rs34096006	intergenic	HS3ST1,RAB28	A	C	0.830391	-48.5246	14.4477	0.000783
15	66464855	rs12437628	intronic	MEGF11	T	C	0.160128	-47.8449	14.2466	0.000784
5	128285686	rs67042189	intergenic	FBN2,SLC27A6	G	A	0.60043	-35.3761	10.5332	0.000784
10	130495355	rs4750992	intergenic	LINC01163,MGMT	T	C	0.626335	-36.3862	10.8378	0.000787
15	66928403	rs893913	ncRNA_intronic	LINC01169	G	T	0.228648	-41.2782	12.2948	0.000787
8	38460527	rs55896502	intergenic	RNF5P1,TACC1	G	A	0.0578468	-69.9922	20.8517	0.000789
11	125793787	---	downstream	DDX25	T	C	0.598024	-35.5039	10.5768	0.000789
14	72324330	rs2098110	intergenic	SIPA1L1,RGS6	C	T	0.443224	-35.4198	10.5535	0.00079
2	141586492	rs2380896	intronic	LRP1B	A	G	0.126774	-54.5273	16.2467	0.00079
13	78028895	rs141557535	intergenic	MYCBP2,SCEL	-	AC	0.207499	-44.5899	13.2868	0.000791
13	78006196	rs9530655	intergenic	MYCBP2,SCEL	A	G	0.207399	-44.5899	13.2868	0.000791
11	96802388	rs79145571	intergenic	JRKL-AS1,MIR7976	T	A	0.737514	-40.2341	11.9918	0.000793
12	118012815	rs10507282	intronic	KSR2	G	C	0.257722	-40.8394	12.1733	0.000794
9	89611015	rs149812099	ncRNA_intronic	LOC100506834	TATC	-	0.637701	-35.6134	10.616	0.000795
19	56687106	rs187987	upstream	GALP	C	T	0.50669	-34.6016	10.3152	0.000795
19	7231992	---	intronic	INSR	CTAA	-	0.827991	-45.4312	13.545	0.000796
12	50248871	rs67906820	intergenic	BCDIN3D,FAIM2	C	-	0.882408	-48.6476	14.5062	0.000798
3	94776538	rs7624843	intergenic	LINC00879,MTHFD2P1	G	A	0.509244	-34.8464	10.3946	0.000801
7	137808110	rs34787420	upstream	MIR4468	G	A	0.80537	-43.1933	12.8873	0.000803
3	151795899	---	intergenic	AADACL2-AS1,MBNL1-AS1	C	T	0.940352	-71.7421	21.4176	0.000809
15	82539688	rs7167913	intronic	EFTUD1	C	T	0.495317	-34.7059	10.3615	0.00081
12	50241013	rs11169176	intergenic	BCDIN3D,FAIM2	G	A	0.878606	-47.8954	14.3019	0.000811
10	78605316	rs1897584	intergenic	C10orf11,KCNMA1	C	T	0.182731	-44.9751	13.4324	0.000813
3	62285141	rs10510876	ncRNA_intronic	PTPRG-AS1	C	G	0.942323	-71.1695	21.2631	0.000817
22	44650173	rs926344	intronic	KIAA1644	G	A	0.359036	-36.6676	10.9553	0.000817
16	66827045	rs1548538	intronic	CCDC79	T	C	0.260358	-38.1636	11.408	0.000822
5	128696341	rs10038633	intergenic	ISOC1,MIR4460	G	A	0.054725	-77.0423	23.033	0.000823
15	82308016	rs2867552	intergenic	LOC101929655,MEX3B	T	C	0.0570398	-75.306	22.5168	0.000825
6	25170501	rs12529629	intergenic	CMAHP,LOC101928663	G	A	0.673803	-36.4175	10.8933	0.000829
13	107625153	rs7325306	intergenic	LINC00443,FAM155A	T	C	0.565944	-34.6821	10.3744	0.000829
2	68311729	rs62145917	intergenic	C1D,WDR92	G	A	0.751603	-39.6399	11.8577	0.000829
2	160291065	rs741	intronic	BAZ2B	G	A	0.935056	-62.0974	18.5781	0.00083
8	96705190	rs3102484	ncRNA_intronic	C8orf37-AS1	T	C	0.404647	-35.0655	10.4917	0.000831
1	59319599	rs74426131	ncRNA_intronic	LINC01135	AT	-	0.820208	-43.4267	12.9957	0.000833
1	59330272	rs12140615	ncRNA_intronic	LINC01135	A	C	0.819214	-43.4267	12.9957	0.000833
3	150262868	rs3836400	intronic	SERP1	T	-	0.839476	-44.1976	13.228	0.000834
2	206544665	rs6711044	intergenic	PARD3B,NRP2	T	C	0.585871	-35.1908	10.532	0.000834
10	130488265	rs4750991	intergenic	LINC01163,MGMT	C	T	0.794157	-43.0423	12.8874	0.000838
14	33938896	rs17101310	intronic	NPAS3	A	G	0.250401	-39.4855	11.8251	0.00084
17	58717832	rs149931676	intronic	PPM1D	T	C	0.285542	-40.156	12.028	0.000842
8	2323766	rs9650472	intergenic	MYOM2,CSMD1	A	G	0.314691	-36.4233	10.9097	0.000842
21	15954660	rs2822787	exonic	SAMSN1	T	C	0.217496	-43.0083	12.8836	0.000843
3	143163169	rs4839595	intronic	SLC9A9	G	A	0.234705	-42.5032	12.7331	0.000844
3	126097849	rs1877966	intergenic	KLF15,CCDC37-AS1	T	C	0.352776	-37.3627	11.1933	0.000844
13	71813378	rs12876714	intergenic	LINC00348,DACH1	G	A	0.939471	-70.5328	21.1302	0.000844
2	50654677	rs11885804	intronic	NRXN1	A	G	0.577623	-35.505	10.6419	0.000849
12	82062312	rs12826173	intronic	PPFIA2	C	T	0.923622	-66.6885	19.9912	0.00085
19	57105492	rs7251367	intergenic	ZNF470,ZNF71	T	C	0.40804	-36.0581	10.8105	0.000852
8	92655605	rs192643947	intergenic	SLC26A7,RUNX1T1	G	A	0.0517704	-87.3848	26.2021	0.000853
8	92728283	rs190622724	intergenic	SLC26A7,RUNX1T1	G	A	0.0527652	-87.3848	26.2021	0.000853
6	161383479	rs604924	intergenic	PLG,MAP3K4	C	T	0.761026	-38.6577	11.5925	0.000854
11	78882172	rs2508241	intronic	TENM4	T	C	0.276387	-39.5018	11.8472	0.000855
13	19663687	rs192695108	intergenic	LINC00442,RNU6-52P	G	A	0.853421	-50.4522	15.1317	0.000855
3	125903186	rs1868120	ncRNA_intronic	ALDH1L1-AS2	G	A	0.915487	-61.0262	18.3038	0.000856
15	66884987	rs4776305	ncRNA_intronic	LINC01169	T	C	0.369118	-34.4075	10.3223	0.000858
6	53163176	rs137885485	intronic	ELOVL5	ACTT	-	0.42022	-34.4758	10.3437	0.000859
13	113538832	rs12427866	UTR3	ATP11A	A	G	0.834629	-44.6034	13.3905	0.000865
11	96774700	rs75849989	intergenic	JRKL-AS1,MIR7976	C	T	0.205046	-43.1916	12.9674	0.000866
15	65104826	rs4777602	intergenic	RBPMS2,PIF1	A	G	0.502403	-33.4696	10.049	0.000866
20	57278022	rs77212705	ncRNA_intronic	STX16-NPEPL1	A	G	0.316845	-36.8515	11.0675	0.000869
1	149037370	rs4586028	ncRNA_intronic	NBPF25P	C	T	0.778952	-41.4306	12.4427	0.000869
6	161544198	rs9347480	intergenic	MAP3K4,AGPAT4	A	C	0.940171	-64.8618	19.4872	0.000873
19	29413635	rs35909958	intergenic	LOC100420587,LINC00906	T	C	0.211159	-46.1264	13.8583	0.000873
6	45987653	rs9395145	intronic	CLIC5	C	T	0.264431	-39.6341	11.9083	0.000874
6	40778324	rs7768866	intergenic	LRFN2,LOC101929555	A	G	0.91453	-57.306	17.2185	0.000874
6	73036411	rs77263461	intronic	RIMS1	G	A	0.828751	-44.4948	13.3724	0.000877
2	25597681	rs730072	intergenic	DNMT3A,DTNB	A	G	0.341796	-36.0242	10.8269	0.000877
3	46722373	rs6792255	intronic	ALS2CL	C	T	0.61672	-37.4604	11.2596	0.000878
9	28249691	rs67112157	intronic	LINGO2	C	T	0.783957	-41.7321	12.5458	0.00088
9	28402971	rs10812807	intronic	LINGO2	T	C	0.666711	-38.5772	11.5985	0.000881
13	104085848	rs7324647	intergenic	MIR548AS,NONE	G	A	0.107717	-57.0315	17.1501	0.000883
1	170221400	rs5778655	intergenic	METTL11B,LINC01142	G	-	0.838515	-47.4697	14.277	0.000884
14	25687715	rs34176723	intergenic	STXBP6,NOVA1	-	T	0.274245	-39.4901	11.8778	0.000885
9	136817186	rs654182	intronic	VAV2	T	C	0.637834	-35.7614	10.758	0.000887
9	136819146	rs141971619	intronic	VAV2	TTC	-	0.637517	-35.7614	10.758	0.000887
8	6064071	rs4471063	intergenic	CSMD1,LOC100287015	T	C	0.142074	-47.8304	14.3891	0.000887
X	85115604	rs187564085	downstream	CHM	G	T	0.205142	-32.0251	9.635	0.000888
17	36048871	---	intronic	HNF1B	T	G	0.0836017	-69.3501	20.8681	0.00089
5	113542198	rs10040046	intergenic	YTHDC2,KCNN2	T	C	0.094526	-56.9535	17.1387	0.00089
13	20949225	rs7333859	intergenic	GJB6,CRYL1	A	G	0.639647	-35.968	10.8251	0.000892
14	25712232	rs1454367	intergenic	STXBP6,NOVA1	T	C	0.243785	-41.5155	12.5061	0.000901
9	28578887	rs75113461	intronic	LINGO2	G	A	0.876905	-49.2128	14.8266	0.000903
18	74369096	rs75018831	intergenic	LOC101927651,LOC400661	-	TCT	0.445486	-36.6016	11.0294	0.000905
13	92072110	rs3848051	intronic	GPC5	A	G	0.360123	-32.8657	9.90415	0.000905
16	59686109	rs2088741	intergenic	GOT2,APOOP5	G	A	0.637142	-34.921	10.5265	0.000908
2	17675992	rs389916	intergenic	FAM49A,RAD51AP2	T	G	0.0859856	-54.5336	16.4375	0.000908
6	53351289	rs1467408	intergenic	ELOVL5,GCLC	A	G	0.917606	-59.7071	18.0001	0.00091
16	61863336	rs190621330	intronic	CDH8	C	T	0.0506143	-81.5897	24.6069	0.000914
2	141491981	rs12467677	intronic	LRP1B	T	G	0.198795	-48.148	14.5234	0.000916
14	30588110	rs11627948	intergenic	PRKD1,G2E3	T	C	0.218742	-43.0892	13.0005	0.000918
9	76997098	rs34622406	ncRNA_intronic	LOC101927358,MIR6130	T	G	0.0701211	-66.479	20.0582	0.000919
5	157634926	rs186822390	intergenic	CLINT1,LOC101927697	C	T	0.931454	-72.6128	21.9159	0.000922
5	157662356	rs117806811	intergenic	CLINT1,LOC101927697	A	G	0.931265	-72.6132	21.916	0.000922
1	88227120	rs41461152	intergenic	LINC01364,PKN2-AS1	T	G	0.6407	-33.7347	10.1827	0.000923
1	162531494	rs28384483	UTR5	UAP1	T	C	0.343048	-37.853	11.4258	0.000923
7	123850188	rs138020409	intergenic	TMEM229A,LOC101928211	C	A	0.938735	-71.9346	21.7155	0.000924
22	44748989	rs185431015	intergenic	KIAA1644,LOC101927526	T	C	0.207353	-43.5723	13.1544	0.000925
13	58856242	rs8000262	intergenic	LOC101926897,DIAPH3	A	G	0.329068	-35.8854	10.8381	0.000929
9	4596213	rs10974636	intergenic	SLC1A1,SPATA6L	T	G	0.625701	-34.4018	10.3893	0.000929
3	168951915	rs11719636	intronic	MECOM	A	G	0.0960716	-58.5234	17.6832	0.000935
6	8261214	rs117647322	intergenic	EEF1E1-BLOC1S5,SLC35B3	G	A	0.0532853	-74.8176	22.6089	0.000936
9	35905761	rs10814295	upstream	HRCT1	T	C	0.781651	-40.6986	12.3005	0.000937
16	73301111	rs11866137	intergenic	C16orf47,LOC100506172	T	A	0.898983	-56.7558	17.1526	0.000937
15	51942208	---	intergenic	DMXL2,SCG3	A	G	0.946018	-83.7084	25.301	0.000938
15	51822405	---	intronic	DMXL2	G	T	0.947045	-83.7083	25.301	0.000938
2	149246551	rs10497034	intronic	MBD5	A	G	0.74526	-40.0946	12.122	0.000941
3	61957368	---	intronic	PTPRG	A	G	0.947664	-73.9979	22.3735	0.000942
9	6600071	rs117712249	intronic	GLDC	G	A	0.884035	-56.2326	17.0072	0.000945
5	113514627	---	intergenic	YTHDC2,KCNN2	T	A	0.0883941	-58.2628	17.6225	0.000946
17	75238874	rs78651327	intergenic	SEC14L1,SEPT9	C	T	0.077365	-63.991	19.3578	0.000947
7	155379294	rs6651028	intergenic	CNPY1,RBM33	G	C	0.938825	-70.5116	21.334	0.000949
1	166824667	rs12404946	downstream	POGK	G	C	0.698851	-37.9287	11.4759	0.00095
20	40007073	rs6065343	intergenic	EMILIN3,CHD6	G	T	0.443167	-36.3934	11.0113	0.00095
6	53322869	rs640848	intergenic	ELOVL5,GCLC	C	T	0.867041	-51.2053	15.4989	0.000954
13	67590302	rs2181753	intronic	PCDH9	C	T	0.530481	-33.73	10.2095	0.000954
10	66453375	rs10995982	intergenic	REEP3,ANXA2P3	C	T	0.518459	-35.5458	10.7613	0.000956
10	66454412	rs71028578	intergenic	REEP3,ANXA2P3	G	-	0.518296	-35.5458	10.7613	0.000956
2	39159616	rs184205632	intronic	ARHGEF33	G	A	0.839984	-45.4991	13.7761	0.000957
18	28826698	rs2217075	intergenic	DSC1,DSG1	C	T	0.0752272	-67.296	20.376	0.000958
3	178420628	rs78520246	intronic	KCNMB2	C	T	0.391729	-36.4101	11.0244	0.000958
17	15235878	rs1380184	intronic	TEKT3	A	G	0.303237	-35.5982	10.78	0.000959
X	48365517	rs6651590	intergenic	FTSJ1,PORCN	T	G	0.582086	-27.1435	8.21921	0.000959
17	42355095	rs117431393	intergenic	SLC4A1,LOC101926996	A	G	0.942097	-75.2177	22.7813	0.000961
13	61817377	rs3127298	intergenic	MIR3169,PCDH20	G	A	0.912295	-57.9421	17.5505	0.000962
2	17655480	rs394874	intergenic	FAM49A,RAD51AP2	T	C	0.0785466	-55.6031	16.8462	0.000965
9	96367121	rs34389956	intronic	PHF2	-	T	0.168179	-45.3759	13.7488	0.000966
14	99726000	rs2614462	intronic	BCL11B	C	G	0.851565	-48.8287	14.7988	0.000968
7	154904988	---	intergenic	HTR5A,INSIG1	A	G	0.302537	-37.4734	11.3625	0.000974
6	161608089	rs3778224	intronic	AGPAT4	C	T	0.898504	-54.5976	16.5577	0.000976
11	68000579	rs4930568	intergenic	SUV420H1,C11orf24	A	G	0.230646	-41.5922	12.6157	0.000978
7	89592000	rs76617248	ncRNA_intronic	STEAP2-AS1	T	C	0.154647	-52.5991	15.9578	0.00098
11	98919031	rs12576805	intronic	CNTN5	A	C	0.612567	-36.6266	11.113	0.000981
2	213313085	---	intronic	ERBB4	C	A	0.902859	-57.0687	17.3174	0.000983
20	731927	rs6107871	intergenic	SCRT2,SLC52A3	T	C	0.269107	-38.2562	11.6112	0.000985
10	78522318	rs846642	intergenic	C10orf11,KCNMA1	G	A	0.408204	-32.8786	9.98019	0.000986
3	143167372	rs61591068	intronic	SLC9A9	A	C	0.241861	-40.05	12.1573	0.000987
11	10714074	rs34632364	intronic	MRVI1	G	-	0.81491	-42.6966	12.964	0.000989
1	217355764	rs17045404	intergenic	ESRRG,GPATCH2	C	A	0.702804	-37.4556	11.3746	0.000991
9	89629870	rs7035658	ncRNA_intronic	LOC440173	G	A	0.636412	-34.9229	10.6056	0.000992
10	77718324	rs36051998	intronic	C10orf11	-	A	0.333153	-35.3218	10.7283	0.000993
12	6344369	rs138043550	intronic	CD9	G	A	0.886084	-62.7759	19.067	0.000994
3	178362198	rs77844160	intronic	KCNMB2	T	C	0.214076	-42.3686	12.8797	0.001004
14	34199901	rs11386738	intronic	NPAS3	-	A	0.945148	-67.5294	20.534	0.001007
7	137819080	rs1906488	intergenic	MIR4468,TRIM24	T	C	0.659486	-35.6673	10.8476	0.001009
18	28705370	rs2017984	ncRNA_intronic	LOC101927698	C	T	0.299866	-36.3113	11.0447	0.00101
14	50830113	rs11570808	intronic	CDKL1	G	A	0.906058	-60.3433	18.3549	0.00101
11	125795030	rs12417252	intergenic	DDX25,CDON	T	C	0.228816	-40.6598	12.3692	0.001012
6	155406753	rs1485755	intergenic	SCAF8,TIAM2	A	G	0.110443	-52.4972	15.9706	0.001012
11	131946681	rs1547898	intronic	NTM	A	G	0.249197	-38.4942	11.7122	0.001014
15	90877560	rs6496653	intergenic	NGRN,GABARAPL3	G	T	0.501624	-34.8474	10.6025	0.001014
22	44657628	rs135427	intronic	KIAA1644	C	T	0.415039	-34.3732	10.4639	0.00102
14	30605415	rs11627212	intergenic	PRKD1,G2E3	G	A	0.313885	-38.4012	11.6895	0.00102
11	117336108	rs482287	intronic	DSCAML1	T	C	0.501469	-35.4744	10.8018	0.001023
2	50644449	rs12053271	intronic	NRXN1	A	C	0.601604	-35.5787	10.837	0.001027
3	47033113	rs200666191	exonic	NBEAL2	C	A	0.0672718	-67.9921	20.7163	0.00103
4	87752909	rs7690165	intronic	SLC10A6	G	T	0.0534188	-68.4673	20.8644	0.001032
1	195381965	rs16838346	intergenic	NONE,KCNT2	A	G	0.179877	-41.4379	12.6278	0.001033
1	108569698	rs1781070	intergenic	VAV3-AS1,SLC25A24	G	A	0.325342	-36.7678	11.2052	0.001033
11	67908805	rs11228144	intergenic	CHKA,SUV420H1	G	A	0.283881	-37.7539	11.5067	0.001034
6	40469438	rs2436735	intronic	LRFN2	A	G	0.875636	-56.0644	17.0892	0.001036
8	107892871	rs145222126	intergenic	ABRA,ANGPT1	A	G	0.932346	-61.4934	18.7464	0.001037
18	18655451	rs1481280	intronic	ROCK1	A	C	0.456173	-34.2315	10.4365	0.001038
17	50183057	rs12451232	intronic	CA10	C	T	0.795424	-38.7724	11.822	0.001039
13	22827752	rs1408051	ncRNA_intronic	LINC00540	C	T	0.14492	-51.0764	15.5785	0.001043
16	59886113	rs12920783	intergenic	APOOP5,LOC101927580	C	T	0.388919	-35.5811	10.8538	0.001045
17	43367152	rs4792846	intronic	MAP3K14	A	G	0.747995	-37.0763	11.3122	0.001047
19	49307999	rs837642	intronic	BCAT2	A	G	0.845299	-51.1917	15.6185	0.001047
6	53357018	rs6922238	intergenic	ELOVL5,GCLC	G	T	0.88972	-51.313	15.6615	0.001051
1	202189966	rs3010073	intronic	LGR6	G	A	0.346977	-36.8541	11.2477	0.001051
6	41127543	rs2234255	exonic	TREM2	G	A	0.928514	-67.0836	20.4746	0.001051
18	43302976	rs3760578	intergenic	SLC14A2,SLC14A1	T	C	0.582732	-34.46	10.5189	0.001053
8	27567885	rs11780158	intergenic	MIR3622B,CCDC25	C	T	0.724064	-39.6631	12.1113	0.001057
17	78994528	rs68136562	intergenic	CHMP6,BAIAP2-AS1	A	G	0.702786	-36.2554	11.0716	0.001058
4	187538330	rs1280099	exonic	FAT1	A	G	0.41424	-34.0388	10.3948	0.001058
1	248138013	rs12736548	intronic	OR2L13	C	T	0.206971	-42.4209	12.9553	0.001059
4	120619656	rs10007283	intergenic	PDE5A,LINC01365	A	G	0.338988	-36.2924	11.0897	0.001066
8	15271690	rs11990912	intergenic	SGCZ,TUSC3	A	C	0.250067	-39.5761	12.0949	0.001067
8	135023442	rs1379440	intergenic	ST3GAL1,ZFAT	T	C	0.0901178	-58.8903	17.9989	0.001068
12	91849109	rs12309325	intergenic	DCN,C12orf79	T	C	0.841698	-48.5565	14.84	0.001068
3	179621537	rs4855123	ncRNA_intronic	LOC101928790	G	T	0.256218	-38.4454	11.7507	0.001069
2	56504565	rs11305389	intronic	CCDC85A	T	-	0.823789	-47.5721	14.5433	0.001071
16	74027248	rs2716566	intergenic	LOC100506172,LOC101928035	C	T	0.600267	-35.1944	10.7593	0.001071
18	2405380	rs8090995	intergenic	LINC00470,METTL4	C	T	0.729751	-38.2628	11.7	0.001074
5	65107342	rs11749289	intronic	NLN	C	T	0.497461	-33.9282	10.3793	0.00108
3	94346008	rs9861461	intergenic	NSUN3,LINC00879	C	A	0.198531	-48.7252	14.9058	0.00108
2	16504888	rs12615356	intergenic	MYCN,FAM49A	A	G	0.549209	-34.7364	10.6291	0.001083
5	172133229	rs77850724	intergenic	NEURL1B,LOC101928093	A	C	0.836538	-43.7705	13.3941	0.001084
20	2796341	rs148817519	exonic	C20orf141	C	G	0.218683	-37.609	11.5099	0.001085
8	65942775	rs4556118	intergenic	CYP7B1,LINC00251	T	C	0.515805	-32.8275	10.0476	0.001086
5	173576129	rs11738508	intergenic	HMP19,MSX2	G	A	0.139305	-45.6655	13.9779	0.001087
5	8564762	rs6889061	intergenic	MIR4458HG,LOC101929284	T	G	0.145911	-45.6328	13.9701	0.001089
2	213317117	rs35477461	intronic	ERBB4	A	-	0.901448	-56.7111	17.3643	0.001091
21	35724968	rs67398828	intergenic	LINC00310,KCNE2	CATGAATGGTTTA	-	0.693387	-36.7444	11.2516	0.001092
8	38779647	rs9643901	intronic	PLEKHA2	G	A	0.690992	-36.3832	11.1408	0.001092
9	96506903	rs2265806	intergenic	PHF2,MIR4291	G	T	0.581862	-35.7976	10.9629	0.001093
4	81906024	rs7667446	intergenic	C4orf22,BMP3	C	T	0.396335	-34.8718	10.6805	0.001095
22	46075526	---	intronic	ATXN10	C	G	0.0574084	-72.6581	22.2559	0.001096
20	595425	rs16991081	intergenic	TCF15,SRXN1	G	T	0.188286	-43.3262	13.2753	0.0011
11	121076896	rs142912903	intergenic	TECTA,SC5D	AAC	-	0.62791	-35.3704	10.8395	0.001102
21	18057043	rs8129927	intergenic	LINC00478,C21orf37	A	G	0.466738	-33.8345	10.3699	0.001103
8	59802662	rs10092649	intronic	TOX	A	C	0.0570506	-67.3045	20.6296	0.001104
11	121129931	rs4936599	intergenic	TECTA,SC5D	T	C	0.611468	-35.023	10.736	0.001105
11	121135327	---	intergenic	TECTA,SC5D	-	A	0.612343	-35.023	10.736	0.001105
10	101166544	rs2234971	exonic	GOT1	C	T	0.502674	-33.0475	10.1315	0.001107
11	81680388	rs1955011	ncRNA_intronic	LOC101928989	A	G	0.274064	-38.4713	11.7957	0.001108
4	30454312	rs6833068	intergenic	MIR4275,PCDH7	A	T	0.677635	-35.7495	10.9634	0.001111
8	2590639	rs6982142	intergenic	MYOM2,CSMD1	C	G	0.231365	-39.1588	12.0114	0.001114
22	23589154	rs2267019	intronic	BCR	G	A	0.253039	-38.1849	11.713	0.001114
1	109711263	rs12565561	intronic	KIAA1324	A	G	0.590254	-34.6541	10.6311	0.001115
18	74739537	rs67753710	intronic	MBP	-	CT	0.574124	-35.4436	10.8731	0.001115
12	50248724	rs7953118	intergenic	BCDIN3D,FAIM2	C	T	0.845846	-43.0329	13.2018	0.001116
15	38383103	rs1319145	intergenic	LOC101928227,SPRED1	G	A	0.453062	-33.4207	10.2543	0.001117
16	54994622	rs11866410	intergenic	IRX5,IRX6	C	T	0.928171	-64.15	19.6841	0.001118
19	45082982	rs12976975	intergenic	CEACAM22P,IGSF23	G	T	0.629879	-34.7364	10.6593	0.001119
7	154904070	rs1730149	intergenic	HTR5A,INSIG1	G	A	0.411325	-35.4594	10.8816	0.001119
7	134027660	rs10954444	intergenic	SLC35B4,AKR1B1	T	C	0.836364	-43.7645	13.4307	0.00112
6	14136373	rs3734665	UTR3	CD83	G	A	0.427922	-32.8429	10.0792	0.00112
20	51886614	rs6022365	intronic	TSHZ2	G	A	0.0560748	-69.4431	21.3133	0.001121
10	80395366	rs892543	intergenic	LINC00595,ZMIZ1-AS1	G	A	0.43516	-34.6251	10.6284	0.001123
22	29525126	rs132274	intronic	KREMEN1	C	T	0.285142	-35.8487	11.0065	0.001126
2	79416434	---	intergenic	REG3A,LOC101927987	T	C	0.940839	-76.3502	23.4433	0.001127
8	2322620	rs150376510	intergenic	MYOM2,CSMD1	-	TC	0.315811	-35.7676	10.9887	0.001134
1	18859887	rs35192516	intergenic	KLHDC7A,PAX7	T	C	0.313607	-36.8965	11.3363	0.001135
8	96678745	rs7010953	ncRNA_intronic	C8orf37-AS1	A	G	0.724156	-37.3762	11.4862	0.001138
12	132671437	rs11246973	intergenic	NOC4L,GALNT9	T	G	0.72476	-38.1726	11.7338	0.001141
16	59886838	rs9922307	intergenic	APOOP5,LOC101927580	C	G	0.275932	-37.77	11.6106	0.001142
16	61034811	rs1424253	intergenic	LOC729159,CDH8	G	A	0.274436	-36.0678	11.0895	0.001144
8	5387251	rs75818661	intergenic	CSMD1,LOC100287015	C	T	0.830472	-42.933	13.2012	0.001145
8	67114113	rs4613981	intergenic	LINC00967,RRS1-AS1	A	G	0.474184	-33.2306	10.2223	0.001151
X	42351292	rs11798337	intergenic	CASK,PPP1R2P9	T	G	0.295673	-27.5792	8.48434	0.001152
18	71535340	rs880372	intergenic	LOC100505817,FBXO15	T	C	0.130732	-50.7009	15.6028	0.001156
5	146943123	rs6867523	ncRNA_intronic	JAKMIP2-AS1	C	G	0.333289	-34.9911	10.7706	0.001159
X	141960960	rs12848023	intergenic	MAGEC2,SPANXN4	C	G	0.729556	-29.4904	9.07892	0.001161
7	155618247	rs288765	intergenic	SHH,LOC389602	G	A	0.661584	-34.9073	10.7474	0.001162
11	125601979	rs4937023	intergenic	ACRV1,PATE1	C	T	0.537146	-35.785	11.0177	0.001162
4	13073618	rs566737	intergenic	HS3ST1,RAB28	A	C	0.843633	-48.5914	14.9618	0.001163
2	56519175	---	intronic	CCDC85A	A	C	0.812788	-46.4695	14.3131	0.001168
3	189254670	rs114067206	intergenic	TPRG1,TP63	G	A	0.0637189	-68.4716	21.0902	0.001168
3	194387253	---	exonic	LSG1	G	A	0.180433	-42.6462	13.1364	0.001169
4	120596579	rs71999651	intergenic	PDE5A,LINC01365	-	TTCC	0.336481	-36.396	11.2125	0.00117
6	30849822	rs9295930	intergenic	IER3,DDR1	A	G	0.383886	-34.9992	10.7826	0.001171
15	31661641	rs6493627	intronic	KLF13	C	T	0.759076	-39.8562	12.2838	0.001176
9	93558010	rs1333638	intergenic	DIRAS2,SYK	C	T	0.543343	-33.1217	10.2104	0.001179
5	62990951	rs79443625	intergenic	IPO11,HTR1A	T	A	0.929185	-63.292	19.5161	0.001182
5	177979113	rs474772	intronic	COL23A1	T	C	0.93613	-74.3848	22.9366	0.001182
2	68285641	rs4671871	intronic	C1D	G	A	0.727831	-36.7369	11.3274	0.001182
3	93843683	rs9860972	intronic	NSUN3	A	G	0.441287	-35.2114	10.8613	0.001187
17	14758142	rs12951588	intergenic	HS3ST3B1,CDRT7	A	G	0.251269	-35.3931	10.9198	0.00119
17	14758826	rs35538661	intergenic	HS3ST3B1,CDRT7	-	C	0.251736	-35.3931	10.9198	0.00119
5	10680547	rs9857	UTR3	DAP	C	T	0.381575	-33.7861	10.4267	0.001194
16	66483806	rs9926387	intronic	BEAN1	T	C	0.254072	-39.212	12.1013	0.001194
6	54713828	rs10428736	intronic	FAM83B	A	G	0.877944	-51.7916	15.985	0.001195
9	7515786	rs10511481	intergenic	KDM4C,TMEM261	A	C	0.648435	-35.8732	11.0727	0.001196
17	46574318	rs4239210	intergenic	LOC101927166,HOXB1	A	G	0.298128	-37.4295	11.5542	0.001197
7	16557858	rs4721511	intergenic	SOSTDC1,LRRC72	C	T	0.610814	-34.2791	10.584	0.0012
5	127177522	rs33914303	intergenic	CTXN3,LINC01184	T	-	0.406409	-34.1723	10.5513	0.001201
16	61027587	rs974221	intergenic	LOC729159,CDH8	C	A	0.210674	-40.5436	12.5199	0.001202
11	8341669	rs4362135	intergenic	LMO1,STK33	T	C	0.579314	-33.8066	10.445	0.00121
22	23717854	rs9612337	ncRNA_intronic	CES5AP1	T	A	0.0897196	-53.9172	16.6607	0.001211
10	66463972	rs16920161	intergenic	REEP3,ANXA2P3	A	G	0.672825	-35.8216	11.0704	0.001213
9	36495926	rs10972923	intergenic	RNF38,MELK	G	C	0.675795	-36.2607	11.2066	0.001214
18	74751949	rs62106763	intronic	MBP	A	G	0.54837	-35.421	10.9471	0.001214
1	248089313	rs78570845	intergenic	OR2T8,OR2L13	A	G	0.365152	-35.8586	11.0858	0.001218
18	23054945	rs28454330	intergenic	ZNF521,SS18	C	T	0.758505	-40.6136	12.5554	0.001218
13	107629253	rs149039768	intergenic	LINC00443,FAM155A	AAAAC	-	0.567524	-33.3798	10.3275	0.001229
13	107592100	rs1475550	intergenic	LINC00443,FAM155A	A	G	0.620279	-34.4782	10.6677	0.001229
1	229112266	rs478282	intergenic	RHOU,RAB4A	A	G	0.448142	-33.4243	10.342	0.00123
17	17125702	rs41356848	intronic	FLCN	G	A	0.895088	-55.6181	17.2141	0.001234
2	206606041	---	intronic	NRP2	G	A	0.831861	-44.8717	13.8883	0.001234
6	129179488	rs9388668	intergenic	PTPRK,LAMA2	C	T	0.260875	-41.9281	12.9819	0.001239
9	94227264	rs4744054	intergenic	NFIL3,MIR3910-1	A	G	0.863076	-53.8478	16.6738	0.00124
19	8374407	rs3760680	intergenic	CD320,NDUFA7	T	C	0.249599	-36.6404	11.3464	0.001241
9	133055949	rs4260979	intronic	HMCN2	C	T	0.527696	-35.0315	10.8507	0.001244
15	41214152	rs28434362	intergenic	VPS18,DLL4	T	C	0.300187	-34.9246	10.8176	0.001244
11	10756026	rs4910182	intergenic	MRVI1,CTR9	T	G	0.802807	-40.7948	12.6361	0.001245
7	82207636	rs11765558	intergenic	CACNA2D1,PCLO	T	C	0.758694	-38.7886	12.0158	0.001246
6	53107320	rs9463885	intergenic	GCM1,ELOVL5	C	A	0.416823	-34.0125	10.5394	0.00125
7	157208278	rs72505538	intronic	DNAJB6	A	G	0.112357	-50.6874	15.7148	0.001258
2	87557232	rs3914751	intergenic	LOC285074,LINC00152	G	C	0.856111	-46.1335	14.3084	0.001263
3	20921929	rs76418042	intergenic	LOC101927829,VENTXP7	C	A	0.766373	-37.6731	11.6928	0.001273
9	136801081	rs2810521	intronic	VAV2	G	A	0.514182	-33.0802	10.2677	0.001274
4	96226609	rs17433092	intronic	UNC5C	C	T	0.472735	-34.8926	10.8313	0.001275
6	40416800	rs1433734	intronic	LRFN2	A	C	0.411316	-34.7955	10.8028	0.001278
19	8067359	---	intronic	ELAVL1	A	G	0.0509086	-80.0273	24.8492	0.00128
11	121112889	rs12289923	intergenic	TECTA,SC5D	G	A	0.565596	-34.1871	10.6156	0.00128
6	67494388	rs7759827	intergenic	SLC25A51P1,BAI3	T	C	0.721776	-35.7597	11.1045	0.001281
13	107569280	rs3803241	intergenic	LINC00443,FAM155A	G	T	0.652691	-34.0548	10.5762	0.001282
8	5457210	rs2527719	intergenic	CSMD1,LOC100287015	C	A	0.924125	-63.6424	19.7654	0.001282
4	63843652	rs2055697	intergenic	LPHN3-AS1,TECRL	A	T	0.773739	-37.9934	11.8001	0.001283
6	70442892	---	intronic	LMBRD1	T	G	0.939455	-69.9114	21.714	0.001283
7	31492735	rs218104	intergenic	NEUROD6,CCDC129	G	T	0.50374	-32.7764	10.1796	0.001283
15	60525778	rs190057867	intergenic	FOXB1,ANXA2	G	A	0.949498	-73.6189	22.8696	0.001286
12	91984257	---	intergenic	DCN,C12orf79	T	G	0.826784	-44.4549	13.81	0.001286
14	26136738	rs28525978	intergenic	STXBP6,NOVA1	T	C	0.0707395	-71.3131	22.1543	0.001287
9	33541938	rs35884633	intronic	ANKRD18B	C	T	0.944638	-68.0343	21.1434	0.001292
17	945417	rs68095564	intronic	ABR	GACA	-	0.566648	-34.4567	10.708	0.001292
9	16500182	rs76256811	intronic	BNC2	G	A	0.934608	-74.4536	23.1409	0.001293
8	135048557	rs55927641	intergenic	ST3GAL1,ZFAT	T	C	0.101257	-53.2364	16.5463	0.001293
18	19408529	rs4591246	ncRNA_exonic	MIR133A1HG	A	G	0.332082	-34.7291	10.7939	0.001293
18	19346348	rs10569329	intronic	MIB1	-	AAG	0.331551	-34.6647	10.7754	0.001295
6	7528194	rs9328429	intergenic	RIOK1,DSP	T	C	0.669655	-35.063	10.9026	0.0013
15	90757048	rs76356360	intronic	SEMA4B	C	G	0.148104	-45.4091	14.1228	0.001303
4	115665320	rs6533817	intergenic	UGT8,NDST4	T	C	0.292246	-38.4754	11.9664	0.001303
15	90734820	rs75663145	intronic	SEMA4B	G	A	0.154103	-45.4091	14.1228	0.001303
6	25089611	rs9467389	ncRNA_intronic	CMAHP	G	A	0.504821	-33.8301	10.5232	0.001305
12	6303641	rs182608176	intergenic	VWF,CD9	C	T	0.924186	-66.3307	20.6374	0.001308
8	15209080	rs6983997	intergenic	SGCZ,TUSC3	G	A	0.240096	-38.4257	11.9549	0.001308
20	594780	rs1533087	intergenic	TCF15,SRXN1	C	T	0.771257	-38.4207	11.9548	0.00131
17	4435235	rs73335842	intronic	SPNS2	G	A	0.116493	-52.5091	16.3396	0.001311
19	7242948	rs59011698	intronic	INSR	A	G	0.82741	-43.6486	13.5852	0.001314
5	10676692	rs13168857	intergenic	ANKRD33B,DAP	G	T	0.36472	-33.832	10.531	0.001315
17	78265667	rs7503557	intronic	RNF213	T	C	0.883814	-49.8448	15.5181	0.001318
15	83309108	rs7171180	intronic	CPEB1	C	T	0.446113	-33.4679	10.4219	0.001321
6	124292594	rs728017	intronic	NKAIN2	G	A	0.680481	-34.3745	10.7095	0.001329
6	159579638	rs73589201	intergenic	TAGAP,LOC101929122	C	T	0.108405	-51.9729	16.1994	0.001335
10	77742856	rs7077719	intronic	C10orf11	G	A	0.351562	-33.7013	10.5052	0.001336
3	178320007	rs67744775	intronic	KCNMB2	TAAC	-	0.581507	-34.0869	10.6254	0.001336
16	17254059	rs1463462	intronic	XYLT1	A	G	0.774672	-37.8605	11.8037	0.001339
5	67024643	rs7718500	intergenic	CD180,LOC102467655	T	C	0.667246	-35.6428	11.1152	0.001343
2	31213910	rs2241431	intronic	GALNT14	T	C	0.230174	-37.4223	11.6706	0.001343
22	35043279	rs5755185	intergenic	LARGE,ISX	T	C	0.930385	-64.4873	20.1103	0.001343
7	32258435	rs11763287	intronic	PDE1C	C	A	0.190795	-43.3037	13.5067	0.001345
18	70193484	rs1432074	intergenic	LOC100505776,CBLN2	G	A	0.0823089	-54.1335	16.8853	0.001346
4	190327386	rs1456342	intergenic	LINC01060,LINC01262	T	C	0.938568	-75.797	23.6461	0.001348
8	38459737	rs17582785	upstream	RNF5P1	C	T	0.0785102	-58.4477	18.2397	0.001353
11	58202974	rs17474904	intergenic	OR5B2,OR5B12	G	A	0.685428	-34.7405	10.8433	0.001356
4	35026772	rs6819942	intergenic	NONE,ARAP2	C	T	0.182595	-41.3883	12.9203	0.001358
6	161657187	rs3798940	intronic	AGPAT4	C	T	0.867489	-50.4963	15.765	0.00136
7	8681526	rs76132502	intronic	NXPH1	T	C	0.363466	-35.2192	10.9976	0.001363
11	121136458	rs10790420	intergenic	TECTA,SC5D	T	C	0.760397	-36.9241	11.5305	0.001363
13	36726486	rs193243698	intergenic	DCLK1,CCDC169-SOHLH2	T	C	0.0777036	-61.7964	19.2972	0.001363
1	202184761	rs4950834	intronic	LGR6	T	A	0.254949	-39.6641	12.3873	0.001365
1	202185049	rs35567242	intronic	LGR6	-	A	0.255609	-39.6641	12.3873	0.001365
6	23772870	---	intergenic	HDGFL1,NRSN1	C	A	0.0745662	-63.0233	19.6844	0.001366
15	74010301	rs4327001	intergenic	CD276,C15orf59	A	G	0.288636	-37.005	11.558	0.001366
18	71647745	rs9963306	intergenic	LOC100505817,FBXO15	G	T	0.932548	-70.2688	21.9481	0.001367
6	22980272	rs2473686	intergenic	HDGFL1,NRSN1	A	G	0.594304	-33.169	10.3612	0.001368
16	51302535	rs77757477	intergenic	SALL1,LOC101927364	G	A	0.823758	-45.1987	14.1186	0.001368
16	74032227	rs2716569	intergenic	LOC100506172,LOC101928035	G	T	0.615652	-34.3768	10.738	0.001368
5	109576365	rs77354594	intergenic	LOC100289673,TMEM232	G	A	0.19629	-43.6818	13.6463	0.00137
13	21916512	rs67864731	ncRNA_intronic	LINC00539,MIPEPP3	A	G	0.711028	-36.1516	11.2948	0.001371
4	37925216	rs4832743	intronic	TBC1D1	C	T	0.65767	-34.9474	10.9219	0.001375
4	4845315	rs28655839	intergenic	STX18-AS1,MSX1	G	A	0.296172	-34.3953	10.752	0.001379
15	66878876	rs2469131	ncRNA_intronic	LINC01169	G	T	0.195617	-43.8007	13.6942	0.001381
3	149221611	rs140132942	downstream	TM4SF4	A	G	0.0522428	-72.4915	22.6661	0.001383
15	99461442	rs72752866	intronic	IGF1R	G	A	0.234784	-39.778	12.4381	0.001383
2	206577114	rs3771045	intronic	NRP2	G	A	0.879947	-48.777	15.2519	0.001383
10	36083311	rs140558845	ncRNA_intronic	LINC01452	A	C	0.794314	-40.4468	12.6472	0.001383
10	15227664	rs10906852	intergenic	NMT2,FAM171A1	T	C	0.254208	-38.6225	12.0774	0.001384
9	77282470	rs11144051	intronic	RORB	G	A	0.122026	-50.9494	15.9327	0.001385
4	138614124	rs1830118	intergenic	PCDH18,LINC00616	C	T	0.114141	-53.7614	16.8122	0.001385
2	79401014	rs17016420	intergenic	REG3A,LOC101927987	A	G	0.894413	-58.2769	18.2256	0.001386
16	17214305	rs9923657	intronic	XYLT1	T	G	0.677092	-35.8598	11.2155	0.001387
7	88603347	rs12704413	intronic	ZNF804B	G	A	0.0896681	-50.9195	15.9283	0.00139
14	34436957	rs7142406	intergenic	EGLN3,SPTSSA	C	T	0.183824	-44.2551	13.8452	0.001391
4	187523510	rs1280105	intronic	FAT1	T	C	0.206017	-40.0803	12.5391	0.001391
7	86284002	rs182679996	intronic	GRM3	T	C	0.77806	-42.9202	13.4271	0.001391
7	135488183	rs11770449	intergenic	FAM180A,LUZP6	A	G	0.942991	-73.7792	23.0845	0.001393
8	135012101	rs10081532	intergenic	ST3GAL1,ZFAT	C	T	0.177885	-39.938	12.4993	0.001397
8	15235900	rs13270271	intergenic	SGCZ,TUSC3	G	A	0.20733	-41.7234	13.0584	0.001398
15	23640568	rs78729159	intergenic	GOLGA8S,MIR4508	T	C	0.194586	-41.8311	13.0924	0.001398
1	159992494	rs28690172	intergenic	LINC01133,PIGM	G	A	0.100856	-52.7828	16.5207	0.001399
14	25519963	rs75456262	upstream	STXBP6	A	C	0.205228	-41.4536	12.9747	0.001399
16	74978618	rs2042415	intronic	WDR59	G	A	0.755407	-39.5097	12.3674	0.0014
11	1870852	rs810022	intergenic	TNNI2,LSP1	G	A	0.577769	-35.6563	11.1642	0.001404
19	51254187	rs11084027	intergenic	CLEC11A,GPR32	G	A	0.656158	-33.8224	10.5922	0.001407
1	17462595	rs2871692	intergenic	PADI2,PADI1	C	A	0.190559	-41.2888	12.9313	0.001408
4	81377490	rs142080547	intronic	C4orf22	G	A	0.914194	-56.6409	17.7388	0.001408
13	109080492	rs61973471	intergenic	TNFSF13B,MYO16	A	C	0.652807	-36.7962	11.5249	0.001409
17	71654977	rs9906119	intergenic	SDK2,LOC100134391	T	G	0.300321	-36.5173	11.4395	0.001412
15	99560166	rs8033971	intergenic	PGPEP1L,SYNM	C	T	0.0983146	-56.3805	17.662	0.001412
1	160647545	rs75917977	downstream	CD48	G	C	0.94128	-69.9239	21.9072	0.001414
7	154563276	rs11763741	intronic	DPP6	A	G	0.059893	-63.0561	19.7565	0.001415
6	129293043	rs9375605	intronic	LAMA2	G	A	0.0948944	-58.9687	18.4784	0.001417
4	139765732	rs77145138	intergenic	LINC00499,CCRN4L	C	A	0.252738	-38.0162	11.9137	0.001418
9	96446863	rs12156559	intergenic	PHF2,MIR4291	T	C	0.143887	-46.3134	14.5139	0.001418
7	157830676	rs11760246	intronic	PTPRN2	C	T	0.885951	-52.3935	16.4206	0.001419
9	19470113	rs10964156	intergenic	ACER2,SLC24A2	C	T	0.925134	-59.3188	18.5927	0.001421
2	50547263	rs139045014	intronic	NRXN1	C	-	0.604362	-34.3404	10.7639	0.001421
12	4317819	rs11834692	intergenic	PARP11,CCND2	A	G	0.704205	-36.5953	11.4728	0.001424
10	78359956	rs11314922	intergenic	C10orf11,KCNMA1	C	-	0.426002	-31.8627	9.98886	0.001424
4	86807489	rs10006500	intronic	ARHGAP24	G	A	0.436625	-32.1302	10.0731	0.001424
3	94554192	rs34315354	intergenic	NSUN3,LINC00879	-	C	0.42498	-33.2318	10.42	0.001427
18	74743200	rs470276	intronic	MBP	C	T	0.746724	-38.1106	11.9502	0.001427
20	23700824	rs7266357	intergenic	CST4,CST1	T	G	0.931509	-65.6515	20.5865	0.001427
20	23723678	rs60260041	intergenic	CST4,CST1	C	-	0.932274	-65.6515	20.5865	0.001427
3	94583834	rs7642399	intergenic	NSUN3,LINC00879	T	C	0.424692	-33.2318	10.42	0.001427
13	97883141	rs9516877	intronic	MBNL2	T	C	0.261056	-38.1756	11.972	0.001429
9	15057624	rs7031476	intergenic	LOC389705,TTC39B	G	A	0.848318	-44.2871	13.8894	0.00143
16	17112908	rs1317262	intergenic	NPIPA7,XYLT1	C	T	0.810778	-41.0144	12.8637	0.001431
1	2268678	rs2645069	intronic	MORN1	C	T	0.834938	-45.68	14.3303	0.001434
9	6831631	rs7871156	intronic	KDM4C	C	T	0.852365	-43.1082	13.5286	0.00144
5	58829777	rs1876209	intronic	PDE4D	G	A	0.699412	-36.2943	11.3899	0.00144
9	75622753	rs7469208	intergenic	ALDH1A1,ANXA1	A	G	0.825187	-45.6295	14.3214	0.001442
22	47511958	rs875419	intronic	TBC1D22A	G	A	0.255547	-37.8489	11.8817	0.001445
1	1227665	rs3831920	downstream	ACAP3,SCNN1D	TGAG	-	0.365118	-32.4976	10.2043	0.001449
10	77737678	rs11352643	intronic	C10orf11	-	A	0.351514	-33.3755	10.4801	0.001449
5	177784417	rs4076637	intronic	COL23A1	A	C	0.445856	-31.4212	9.86729	0.001451
1	183796455	rs11349396	intronic	RGL1	T	-	0.238293	-39.2191	12.3187	0.001454
5	78964729	rs10514164	exonic	PAPD4	G	T	0.26249	-37.2976	11.724	0.001466
12	93452247	rs34183826	ncRNA_intronic	LOC643339	-	A	0.225474	-39.6499	12.4637	0.001467
4	35249457	---	intergenic	NONE,ARAP2	C	T	0.0689287	-63.4834	19.957	0.001468
19	49562177	rs117851066	intergenic	CGB7,NTF4	C	T	0.920631	-68.0306	21.3884	0.001469
5	108066173	---	intergenic	LINC01023,FER	C	A	0.0667913	-73.9456	23.2486	0.00147
2	240826711	rs12468878	intergenic	LOC150935,MIR4786	G	A	0.745019	-38.5924	12.1345	0.001471
3	150259152	rs11917991	downstream	SERP1	G	T	0.838908	-42.1673	13.2588	0.001471
2	240822458	---	intergenic	LOC150935,MIR4786	G	A	0.74459	-38.5924	12.1345	0.001471
5	132321276	rs13188569	intergenic	AFF4,ZCCHC10	G	A	0.751204	-35.6854	11.2203	0.001471
2	5747177	rs16863992	intergenic	LINC01249,LINC01248	G	T	0.0717339	-55.9492	17.5927	0.001471
17	32048425	rs75865787	intronic	ASIC2	T	A	0.858687	-44.8722	14.1139	0.001476
3	93818466	rs2965	intronic	NSUN3	T	G	0.414148	-34.7743	10.938	0.001477
4	78351457	rs7678876	intergenic	CCNG2,CXCL13	G	C	0.452694	-33.0142	10.3878	0.001482
8	66966248	rs13252592	intronic	DNAJC5B	T	C	0.56713	-33.0893	10.4116	0.001482
17	67777413	rs17690625	ncRNA_intronic	LOC101928122	T	G	0.311933	-35.1708	11.0689	0.001486
X	116662337	---	intergenic	CT83,KLHL13	C	A	0.938625	-53.4224	16.8142	0.001487
6	11227969	rs4713282	intronic	NEDD9	G	A	0.884759	-48.4405	15.2487	0.00149
3	146479098	---	intergenic	PLSCR5,ZIC4	T	C	0.924352	-64.7842	20.3981	0.001493
12	125251585	rs838869	intergenic	NCOR2,SCARB1	T	C	0.339262	-32.7711	10.319	0.001494
18	74757938	rs470340	intronic	MBP	A	G	0.780999	-40.8432	12.8614	0.001495
14	98694956	rs78162132	intergenic	C14orf64,C14orf177	G	C	0.220486	-40.6453	12.7989	0.001495
11	36988062	rs7949687	intergenic	C11orf74,LOC103312105	A	G	0.923727	-64.4064	20.2809	0.001495
22	44752950	rs1974462	intergenic	KIAA1644,LOC101927526	C	T	0.225949	-39.0089	12.2852	0.001497
2	212783175	rs6435681	intronic	ERBB4	G	A	0.836806	-48.4633	15.2641	0.001499
9	28735866	rs61135014	intronic	LINGO2	A	G	0.869019	-45.8943	14.4565	0.0015
4	187484032	rs6852670	intergenic	MTNR1A,FAT1	T	C	0.231429	-37.8901	11.9366	0.001502
3	189290704	rs79926923	intergenic	TPRG1,TP63	G	A	0.114033	-52.0272	16.3904	0.001502
5	63299929	rs440776	intergenic	HTR1A,RNF180	G	A	0.635074	-34.6505	10.9167	0.001503
22	47567477	rs78497594	intronic	TBC1D22A	G	A	0.643373	-34.262	10.7943	0.001503
12	4273490	rs10848994	intergenic	PARP11,CCND2	A	G	0.648993	-33.3272	10.5002	0.001504
11	95770130	rs1010730	intronic	MAML2	G	A	0.457765	-31.6624	9.97657	0.001505
19	53286909	rs7245596	intronic	ZNF600	C	T	0.685947	-33.4463	10.5392	0.001506
7	7906852	rs6463740	ncRNA_intronic	RPA3OS	T	C	0.34746	-34.2473	10.7933	0.001509
9	36928389	rs4880039	intronic	PAX5	C	A	0.770599	-37.921	11.9514	0.001509
5	11169945	rs6885224	intronic	CTNND2	C	T	0.666978	-34.9266	11.0119	0.001515
14	34826327	rs12432554	intergenic	EGLN3,SPTSSA	G	A	0.347995	-35.4298	11.1724	0.001518
19	7924957	rs11666991	intronic	EVI5L	G	T	0.23927	-41.6328	13.1301	0.00152
17	67635007	rs74252581	ncRNA_intronic	LOC101928122	G	T	0.100027	-54.7446	17.2656	0.001521
6	46423922	rs1918477	intronic	RCAN2	G	A	0.262109	-40.7751	12.8606	0.001522
16	76881330	rs60939089	intergenic	LOC101928203,MIR4719	A	-	0.295989	-34.1678	10.7781	0.001524
1	168709509	rs75452905	intergenic	DPT,LINC00626	C	T	0.886108	-56.4183	17.797	0.001524
7	10949703	rs12669857	intergenic	PER4,NDUFA4	G	C	0.231799	-36.8803	11.6348	0.001525
5	163031692	rs292408	intergenic	MAT2B,LOC101927835	G	A	0.165643	-40.333	12.7244	0.001526
10	36666512	rs2384598	intergenic	LINC01452,ANKRD30A	G	A	0.601015	-34.9265	11.0189	0.001526
21	18230124	rs201669004	intergenic	LINC00478,C21orf37	-	T	0.859736	-50.4551	15.9183	0.001526
2	15729583	rs3755130	intergenic	NBAS,DDX1	G	A	0.571868	-32.0434	10.1111	0.001529
11	247972	rs3020900	intronic	PSMD13	C	A	0.894526	-48.1168	15.188	0.001535
7	129262824	rs75020879	intronic	NRF1	A	G	0.936125	-69.5059	21.9394	0.001535
8	107093203	rs6469035	intergenic	ZFPM2,OXR1	G	A	0.915642	-55.8434	17.629	0.001537
17	69982193	rs11348036	intergenic	CASC17,LOC102723505	-	A	0.789118	-39.2022	12.3779	0.00154
12	56815281	rs2291738	intronic	TIMELESS	C	T	0.160064	-42.3619	13.3783	0.001543
8	117676559	rs10505282	intronic	EIF3H	T	C	0.217694	-41.2161	13.0182	0.001545
11	116562687	rs117393825	intergenic	LINC00900,BUD13	T	C	0.163807	-43.9186	13.8735	0.001547
3	61768269	rs60950982	intronic	PTPRG	C	T	0.246396	-35.332	11.1617	0.001548
7	138026870	rs139215073	intergenic	MIR4468,TRIM24	G	T	0.861059	-47.6693	15.0598	0.001549
9	36914406	rs10973127	intronic	PAX5	A	G	0.823577	-42.7155	13.4956	0.00155
1	170210591	rs34579857	intergenic	METTL11B,LINC01142	T	-	0.840454	-45.3565	14.3326	0.001553
1	170217002	rs10919337	intergenic	METTL11B,LINC01142	G	A	0.840118	-45.3565	14.3326	0.001553
6	70054601	rs79653786	intronic	BAI3	T	C	0.16613	-45.7421	14.4547	0.001553
11	2930656	rs2286660	intronic	SLC22A18	G	T	0.29973	-36.1264	11.4168	0.001554
9	28727612	rs140189782	intronic	LINGO2	C	-	0.876302	-46.8344	14.803	0.001557
6	137649935	rs11154922	intergenic	IFNGR1,OLIG3	C	T	0.0730337	-58.439	18.4715	0.001558
1	229100364	rs638348	intergenic	RHOU,RAB4A	C	T	0.641522	-33.7467	10.6685	0.001561
9	137281707	rs35656590	intronic	RXRA	C	T	0.773653	-40.7356	12.8793	0.001562
X	1993096	---	intergenic	ASMT,DHRSX	A	C	0.282178	-38.3961	12.1405	0.001563
7	88066857	rs193869	intergenic	STEAP4,ZNF804B	G	A	0.627944	-34.2716	10.8371	0.001564
2	56438189	rs6749100	intronic	CCDC85A	C	T	0.40954	-31.9476	10.1028	0.001565
7	128147275	rs193123716	intergenic	METTL2B,LINC01000	T	C	0.103877	-52.6422	16.6462	0.001565
8	2478420	rs75503600	intergenic	MYOM2,CSMD1	G	T	0.757948	-40.1497	12.6965	0.001566
4	89218624	rs72877296	intergenic	PPM1K,HERC6	G	T	0.270003	-36.4406	11.5249	0.001568
6	46651473	rs35373914	intergenic	SLC25A27,TDRD6	-	T	0.394121	-34.7937	11.0061	0.001571
2	115875452	rs150470911	intronic	DPP10	C	A	0.846227	-50.0761	15.8416	0.001572
22	43646677	rs35819202	intronic	SCUBE1	-	G	0.408897	-31.9857	10.1198	0.001574
16	12304810	rs113913935	intronic	SNX29	C	G	0.948437	-66.6656	21.0946	0.001576
16	12270316	rs111419905	intronic	SNX29	C	G	0.949146	-66.6656	21.0946	0.001576
8	15042048	rs34206153	intronic	SGCZ	-	T	0.233674	-37.8604	11.983	0.00158
13	111179796	rs418543	intronic	RAB20	C	T	0.221434	-39.2116	12.4114	0.001581
12	105205032	rs2468338	intronic	SLC41A2	G	T	0.619219	-35.0476	11.0932	0.001581
3	94797056	rs5850972	intergenic	LINC00879,MTHFD2P1	-	AGT	0.511508	-32.8531	10.3991	0.001582
6	53528735	rs139683356	intronic	KLHL31	G	A	0.889987	-50.6797	16.0433	0.001583
9	37380802	---	intergenic	ZCCHC7,GRHPR	A	G	0.110547	-54.7539	17.3337	0.001584
13	103346659	rs7981120	intronic	METTL21C	G	A	0.361788	-35.3385	11.1871	0.001584
12	4070593	rs56160813	intergenic	PARP11,CCND2	C	T	0.846688	-49.2879	15.6042	0.001585
12	56546011	rs3809134	upstream	MYL6B	G	A	0.178036	-41.7202	13.2089	0.001586
1	11934653	rs7545014	intergenic	NPPB,KIAA2013	T	C	0.603743	-33.716	10.6755	0.001587
3	178286073	rs9881434	intronic	KCNMB2	A	G	0.304878	-36.0437	11.4135	0.001589
21	21352994	rs2825928	intergenic	LOC101927797,LINC00320	T	C	0.46507	-32.2458	10.2136	0.001593
4	183553052	rs6841261	intronic	TENM3	G	A	0.0949519	-52.9723	16.7789	0.001594
7	155066575	rs10609674	intergenic	HTR5A,INSIG1	GA	-	0.654717	-34.9617	11.074	0.001594
18	35106439	rs35089305	intronic	CELF4	T	C	0.19275	-39.0509	12.3707	0.001595
8	43413071	rs140606830	intergenic	POTEA,NONE	A	G	0.131509	-47.8786	15.1677	0.001596
18	74757558	rs470970	intronic	MBP	T	C	0.896575	-50.405	15.9718	0.0016
6	161605825	rs10945719	intronic	AGPAT4	T	C	0.868815	-48.6833	15.4292	0.001604
8	39453653	rs72641285	intronic	ADAM18	T	C	0.241647	-37.6164	11.9246	0.001608
13	109073774	rs7322418	intergenic;intergenic	TNFSF13B,MYO16	C	A	0.611022	-35.3983	11.222	0.001608
2	31240326	rs6730181	intronic	GALNT14	G	C	0.187283	-40.4154	12.8137	0.00161
12	118040631	rs4767575	intronic	KSR2	C	T	0.120427	-51.9279	16.4644	0.001611
6	11270884	rs4713333	intronic	NEDD9	A	G	0.69238	-37.4497	11.875	0.001612
5	11166948	rs12716080	intronic	CTNND2	G	T	0.692924	-36.5436	11.5881	0.001613
1	229077516	---	intergenic	RHOU,RAB4A	A	G	0.368653	-33.5496	10.64	0.001615
20	16705102	rs6044267	intergenic	KIF16B,SNRPB2	T	G	0.323978	-33.8219	10.7272	0.001617
13	23612608	rs9317420	intergenic;intergenic	BASP1P1,SGCG	A	G	0.501739	-32.0733	10.1741	0.001619
7	155681728	rs56037097	intergenic	SHH,LOC389602	G	T	0.0823309	-54.287	17.2226	0.001621
15	26503902	rs144180651	intergenic	LINC00929,GABRB3	C	A	0.295436	-36.0153	11.4271	0.001623
2	78862701	rs1239066	intergenic	LOC101927967,REG3G	C	T	0.305169	-34.5855	10.9736	0.001623
20	5043873	rs6139617	intergenic	SLC23A2,TMEM230	A	G	0.419808	-33.0682	10.4933	0.001625
X	65332996	rs192643193	intergenic	VSIG4,HEPH	C	T	0.927942	-47.5312	15.0825	0.001625
17	46585890	rs925284	intergenic	LOC101927166,HOXB1	T	C	0.391537	-32.8208	10.4173	0.001629
8	28298393	rs6558061	intronic	FBXO16	G	A	0.191538	-42.6196	13.528	0.00163
10	101130302	rs1892511	intronic	CNNM1	T	A	0.600083	-32.9498	10.4597	0.001632
10	101182508	rs73328382	intronic	GOT1	A	C	0.142533	-47.1216	14.9585	0.001632
8	39588503	rs12542470	downstream	ADAM18	C	T	0.430522	-33.233	10.5501	0.001633
17	67728703	rs2947868	ncRNA_intronic	LOC101928122	G	A	0.458646	-32.8521	10.4298	0.001634
6	87507673	rs7744472	intergenic	SNHG5,HTR1E	A	G	0.887919	-52.0552	16.5285	0.001636
22	34377771	rs145266161	intergenic	LARGE,ISX	C	T	0.0634518	-65.4973	20.7989	0.001638
3	5349336	rs6803605	intergenic	MIR4790,LOC101927347	A	G	0.866684	-46.8084	14.8654	0.001639
13	23425498	rs73159048	intergenic	LINC00540,BASP1P1	A	G	0.882495	-52.9962	16.8305	0.001639
8	59587226	rs13253753	intergenic	NSMAF,TOX	A	T	0.599651	-34.0011	10.8015	0.001645
19	7605566	rs591040	exonic	PNPLA6	T	C	0.246387	-36.3178	11.5379	0.001646
8	67107158	rs16932626	ncRNA_intronic	LINC00967	T	C	0.525501	-32.3091	10.2671	0.00165
16	85432296	rs9934875	intergenic	MIR5093,GSE1	C	G	0.476343	-32.595	10.3576	0.00165
19	55017508	rs4806768	intronic	LAIR2	C	T	0.667335	-31.5844	10.0379	0.001652
2	15830241	rs10204902	upstream	LOC101926966	G	C	0.634708	-33.0754	10.5148	0.001657
2	56585274	rs11900727	intronic	CCDC85A	A	G	0.788806	-41.6959	13.2562	0.001659
16	85285888	rs12716758	intergenic	LOC400548,LINC00311	T	C	0.155665	-46.2613	14.7087	0.00166
8	96537844	rs1472560	ncRNA_intronic	C8orf37-AS1	T	C	0.516363	-32.5717	10.3574	0.001662
11	114737249	rs7117958	intergenic	NXPE2,CADM1	G	C	0.353421	-33.7567	10.7345	0.001663
18	43298169	rs16978466	intergenic	SLC14A2,SLC14A1	G	A	0.343457	-33.1906	10.5547	0.001663
12	4299606	rs6489525	intergenic	PARP11,CCND2	G	A	0.23732	-37.6857	11.9839	0.001663
20	57945816	rs198512	intergenic	EDN3,PHACTR3	C	G	0.615868	-33.2533	10.5751	0.001664
5	172245092	rs12188089	intergenic	DUSP1,ERGIC1	C	T	0.275401	-34.8184	11.0742	0.001666
17	27341434	rs7220474	intergenic	SEZ6,PIPOX	A	G	0.639327	-34.1849	10.873	0.001667
X	141657785	rs5908361	intergenic	MAGEC2,SPANXN4	C	T	0.360064	-27.7857	8.8386	0.001668
3	62047085	rs11359974	intronic	PTPRG	-	C	0.227248	-38.0803	12.1128	0.001668
3	62046686	rs9311836	intronic	PTPRG	T	C	0.226617	-38.0803	12.1128	0.001668
16	78979560	rs11646571	intronic	WWOX	G	A	0.739717	-36.2437	11.531	0.001671
2	141370160	rs531021	intronic	LRP1B	T	C	0.298767	-36.7194	11.6824	0.001672
5	60795187	rs144116198	intronic	ZSWIM6	-	TC	0.523536	-32.3852	10.3038	0.001672
1	107837591	rs12404866	intronic	NTNG1	G	A	0.662252	-33.8919	10.7862	0.001677
9	89650503	rs10868527	ncRNA_intronic	LOC440173	G	A	0.600053	-31.6825	10.0833	0.001677
6	167624570	rs2346143	intergenic	TCP10L2,UNC93A	G	T	0.666087	-32.5783	10.3688	0.001678
3	33928468	rs9838500	intergenic	PDCD6IP,LOC101928135	A	G	0.813203	-38.9569	12.3987	0.001678
10	25735858	rs11014566	intronic	GPR158	G	A	0.599141	-33.0115	10.5074	0.00168
9	21746274	rs10738596	intergenic	MIR31HG,MTAP	G	C	0.818461	-43.0639	13.708	0.001681
3	38630623	---	intronic	SCN5A	A	C	0.0792357	-66.2789	21.099	0.001682
14	80858152	rs34016104	ncRNA_intronic	DIO2-AS1	C	T	0.679394	-34.6701	11.0372	0.001682
2	5769931	rs55740061	intergenic	LINC01249,LINC01248	A	C	0.0954545	-50.5605	16.095	0.001682
8	65788069	rs13281387	intergenic	CYP7B1,LINC00251	A	G	0.53393	-32.2656	10.2722	0.001683
3	25850788	---	intergenic	OXSM,LINC00692	T	C	0.91551	-61.6272	19.6199	0.001683
2	240751161	rs2412076	intergenic	LOC150935,MIR4786	G	A	0.577252	-33.1845	10.5651	0.001684
9	72063671	rs117158361	intronic	APBA1	C	T	0.74666	-38.9742	12.4109	0.001688
6	85218715	rs6902878	intergenic	CEP162,TBX18	T	C	0.816275	-41.5307	13.2267	0.00169
7	52681177	rs1372579	intergenic	COBL,POM121L12	G	A	0.685997	-37.0165	11.7894	0.00169
11	5408071	rs35934369	intronic	OR51B5	A	-	0.766827	-39.8043	12.6793	0.001693
14	105211666	rs188445817	intronic	ADSSL1	A	G	0.102082	-55.0365	17.5315	0.001694
10	10874408	rs4749995	intergenic	SFTA1P,LINC00710	G	A	0.190661	-41.1847	13.1205	0.001695
6	53310839	rs9367532	intergenic	ELOVL5,GCLC	G	A	0.202193	-39.0084	12.4265	0.001695
X	65328292	rs5918586	intergenic	VSIG4,HEPH	A	G	0.910805	-46.5384	14.8261	0.001696
13	107618184	rs79055953	intergenic	LINC00443,FAM155A	G	T	0.0901924	-61.7232	19.6639	0.001696
3	38424130	---	intronic	XYLB	A	T	0.0680473	-68.3624	21.7827	0.001699
7	32447083	rs384711	intergenic	PDE1C,LOC100130673	T	C	0.173349	-43.5619	13.8821	0.001701
19	8660283	rs10432321	intronic	ADAMTS10	C	T	0.458233	-31.8706	10.1569	0.001702
12	129620358	rs61944808	intronic	TMEM132D	T	C	0.0612653	-76.3996	24.348	0.001702
14	25723757	rs12588608	intergenic	STXBP6,NOVA1	A	G	0.17776	-43.0305	13.714	0.001703
17	67637495	rs12937052	ncRNA_intronic	LOC101928122	G	A	0.20171	-41.3797	13.189	0.001704
17	67650694	rs67050335	ncRNA_intronic	LOC101928122	-	T	0.202057	-41.3797	13.189	0.001704
5	81098251	rs139947688	intergenic	SSBP2,ATG10	G	A	0.839882	-44.8493	14.295	0.001704
17	67636017	---	ncRNA_intronic	LOC101928122	-	AA	0.201949	-41.3797	13.189	0.001704
7	86684927	rs35595157	intronic	KIAA1324L	G	T	0.629114	-33.6729	10.7328	0.001705
1	195241106	rs16838214	intergenic	CDC73,KCNT2	C	T	0.391881	-32.6244	10.3988	0.001705
5	172747247	rs189927152	intronic	STC2	G	A	0.863782	-47.4915	15.1389	0.001707
8	6062800	rs17368494	intergenic	CSMD1,LOC100287015	C	T	0.116351	-49.2676	15.7069	0.001709
10	66442310	rs11285870	intergenic	REEP3,ANXA2P3	G	-	0.519957	-33.8085	10.7803	0.001712
13	80118082	rs141613433	intronic	NDFIP2	TTTA	-	0.660428	-34.1849	10.9004	0.001712
22	29542183	rs3216846	UTR3	KREMEN1	-	T	0.282168	-34.5796	11.0312	0.00172
17	14299892	rs8082455	intergenic	HS3ST3B1,CDRT7	A	G	0.425134	-34.4346	10.9845	0.00172
6	23891240	---	intergenic	HDGFL1,NRSN1	T	C	0.0756156	-61.0442	19.4741	0.001721
3	194387786	---	intronic	LSG1	-	CTTT	0.181175	-40.9668	13.0695	0.001721
3	147362167	rs2319338	intergenic	LOC440982,AGTR1	T	C	0.750669	-34.8697	11.1252	0.001723
15	90850762	rs11635236	intergenic	NGRN,GABARAPL3	A	G	0.280556	-35.8641	11.4445	0.001726
21	18085482	rs1475860	intergenic	LINC00478,C21orf37	G	C	0.52583	-32.1429	10.2584	0.001728
11	117461602	rs553637	intronic	DSCAML1	T	C	0.496127	-34.7106	11.0778	0.001728
7	149500992	rs4725830	intronic	SSPO	G	A	0.222743	-38.2636	12.2121	0.001729
6	11233801	rs72827152	intronic	NEDD9	C	T	0.916756	-57.5991	18.3847	0.00173
6	97974639	rs146643896	ncRNA_intronic	LOC101927314	T	G	0.285905	-35.7377	11.4069	0.00173
13	80057831	rs9565509	intronic	NDFIP2	C	T	0.661364	-34.3109	10.9525	0.001732
17	69728406	rs55864290	intergenic	CASC17,LOC102723505	G	A	0.520761	-33.3469	10.6453	0.001733
17	4407712	rs9896111	intronic	SPNS2	G	A	0.284912	-36.9061	11.7822	0.001734
3	140799213	rs16851055	intronic	SPSB4	A	G	0.0690992	-58.916	18.8099	0.001735
11	8703195	rs67331570	upstream	RPL27A	-	TGC	0.188889	-38.2485	12.214	0.001739
11	8725626	rs7940366	intronic	ST5	C	G	0.1927	-38.2485	12.214	0.001739
15	24033450	rs9920378	intergenic	NDN,PWRN2	T	C	0.593959	-32.0084	10.2211	0.001739
5	109672734	rs58770688	intergenic	LOC100289673,TMEM232	C	T	0.706402	-34.4487	11.0054	0.001747
11	125757235	rs112098079	UTR5	HYLS1	-	A	0.539006	-33.9122	10.8345	0.001748
12	12106053	rs141690844	intergenic	RNU6-19P,BCL2L14	G	T	0.905182	-53.0224	16.9408	0.001749
11	95749304	rs12286938	intronic	MAML2	C	T	0.108144	-48.7153	15.5663	0.001751
7	16587257	rs62441149	intronic	LRRC72	A	C	0.677912	-33.6736	10.7601	0.001751
17	15172419	rs5819517	intergenic	PMP22,TEKT3	A	-	0.481625	-32.147	10.274	0.001754
6	161675491	rs3798943	intronic	AGPAT4	C	T	0.804011	-41.0652	13.1254	0.001756
16	12597602	rs8061448	intronic	SNX29	G	A	0.882314	-50.3465	16.0925	0.001757
14	105147308	rs7145300	intergenic	MIR4710,INF2	A	G	0.550789	-32.2402	10.31	0.001765
9	115631418	rs10114602	UTR3	SNX30	C	T	0.400134	-33.6178	10.7516	0.001767
3	179624681	rs10581509	ncRNA_intronic	LOC101928790	-	TCA	0.255954	-36.8317	11.7795	0.001767
12	13555908	rs7960985	intergenic	C12orf36,GRIN2B	G	C	0.122026	-47.9245	15.3311	0.001772
5	10672391	rs11746592	intergenic	ANKRD33B,DAP	A	G	0.556091	-32.0045	10.2394	0.001774
18	74731642	rs8090485	intronic	MBP	T	C	0.543984	-31.9635	10.2264	0.001775
17	53654209	rs112592001	intergenic	MMD,TMEM100	-	T	0.154852	-45.4555	14.543	0.001775
9	83653556	---	intergenic	LOC101927477,TLE1	T	C	0.12764	-47.5542	15.2154	0.001776
22	50610299	rs34564312	intronic	PANX2	-	A	0.136413	-48.9729	15.6732	0.00178
7	152658352	rs1106716	intergenic	ACTR3B,DPP6	A	G	0.842014	-46.8334	14.9883	0.00178
5	8784063	rs16881407	intergenic	MIR4458HG,LOC101929284	G	T	0.772776	-41.7164	13.3524	0.001783
5	71022741	---	intergenic	CARTPT,MAP1B	T	C	0.0713522	-68.1072	21.8096	0.001791
9	77328579	rs80110628	intergenic	RORB,TRPM6	C	T	0.0956765	-55.5977	17.8058	0.001793
18	6505597	rs11873891	intergenic	L3MBTL4,C18orf64	G	A	0.213732	-38.5527	12.3467	0.001793
11	125621186	rs34148995	intergenic	PATE1,PATE2	T	-	0.647114	-35.2952	11.305	0.001796
6	8399931	rs2327084	intergenic	EEF1E1-BLOC1S5,SLC35B3	A	G	0.848047	-45.9997	14.7345	0.001797
5	52292555	rs35236	intronic	ITGA2	T	G	0.491024	-31.0742	9.95588	0.001801
17	14177467	---	intergenic	CDRT15,HS3ST3B1	C	T	0.0599945	-63.0553	20.2022	0.001801
10	107883904	rs17819726	intergenic	LOC101927549,SORCS1	A	G	0.909407	-56.4443	18.0847	0.001802
2	199964073	---	intergenic	LOC101927619,SATB2	-	ATGT	0.203981	-40.6302	13.0188	0.001803
7	82197863	rs28694335	intergenic	CACNA2D1,PCLO	T	C	0.713522	-34.731	11.1291	0.001804
7	82195035	rs3056581	intergenic	CACNA2D1,PCLO	ACTG	-	0.714324	-34.731	11.1291	0.001804
2	199983384	rs75510369	intergenic	LOC101927619,SATB2	A	G	0.20721	-39.951	12.802	0.001804
14	20533442	rs1805277	intergenic	OR4L1,OR4K17	A	G	0.31969	-33.641	10.7806	0.001805
8	18629355	---	intronic	PSD3	T	C	0.616382	-32.6805	10.4724	0.001805
1	1241800	rs3737720	intronic	ACAP3	G	A	0.364377	-31.8994	10.2223	0.001805
10	125771087	rs7076421	intronic	CHST15	A	G	0.452591	-32.4097	10.3872	0.001808
6	95480593	rs79357372	intergenic	TSG1,MANEA-AS1	G	A	0.945498	-90.0207	28.8548	0.00181
6	47306041	rs9473066	intergenic	TNFRSF21,CD2AP	A	G	0.700616	-34.6067	11.0939	0.001812
12	116135929	rs73404172	intergenic	TBX3,MED13L	A	G	0.584782	-31.9396	10.2389	0.001812
5	128551757	---	intergenic	ISOC1,MIR4460	G	T	0.0537577	-70.4411	22.5847	0.001815
14	25917248	rs10148615	intergenic	STXBP6,NOVA1	A	G	0.877303	-60.534	19.4102	0.001817
20	40976288	rs192626279	intronic	PTPRT	T	G	0.940187	-58.6567	18.811	0.001819
2	17901485	rs1834619	intronic	SMC6	G	A	0.050775	-65.5536	21.0225	0.001819
9	39008877	rs7048342	intergenic	FAM201A,CNTNAP3	A	C	0.591104	-32.6759	10.4791	0.00182
2	31158875	rs62139547	intronic	GALNT14	T	C	0.113752	-49.8228	15.9798	0.001822
7	9102112	rs1476620	intergenic	NXPH1,PER4	G	A	0.852075	-46.3076	14.8524	0.001822
16	28149672	rs11640001	intronic	XPO6	C	G	0.349786	-33.6753	10.8014	0.001823
21	44188956	---	intronic	PDE9A	C	T	0.568832	-31.5655	10.1259	0.001825
14	105247476	rs36214559	intronic	AKT1	T	C	0.102941	-54.828	17.5887	0.001826
22	28103259	rs1569950	intergenic	LINC01422,MN1	G	A	0.781901	-38.1239	12.2306	0.001826
X	70394700	rs7057298	intergenic	NLGN3,BCYRN1	A	G	0.176463	-34.0996	10.9404	0.001828
22	35980173	rs9610322	intergenic	RASD2,MB	A	G	0.660652	-34.3059	11.0065	0.001828
15	98882772	rs76091785	intergenic	LOC101927332,FAM169B	G	A	0.138429	-45.5699	14.6211	0.001829
4	133589454	rs2419532	intergenic	NONE,PCDH10	C	T	0.164201	-46.006	14.7625	0.001831
7	121130521	rs73225220	intergenic	FAM3C,PTPRZ1	G	A	0.899519	-54.891	17.6142	0.001831
3	94253526	rs55672406	intergenic	NSUN3,LINC00879	T	G	0.254352	-38.6057	12.3901	0.001834
8	5426516	rs79869495	intergenic	CSMD1,LOC100287015	A	C	0.918558	-61.6115	19.7753	0.001836
6	11773851	rs4713893	intronic	ADTRP	G	T	0.111727	-47.7759	15.3349	0.001836
3	125724313	rs6791399	downstream	SLC41A3	C	A	0.938168	-64.9739	20.8613	0.001842
3	125733852	rs2047805	intronic	SLC41A3	A	G	0.938051	-64.974	20.8614	0.001842
6	66590361	rs138339261	intergenic	SLC25A51P1,NONE	A	G	0.889171	-55.3497	17.7718	0.001843
14	33945710	rs11847009	intronic	NPAS3	A	T	0.175661	-40.0513	12.8624	0.001847
11	70492000	rs188012850	intronic	SHANK2	T	C	0.0795029	-60.1958	19.3359	0.001851
10	90820832	rs117548198	intergenic	FAS,MIR4679-2	C	A	0.114305	-51.9206	16.6824	0.001856
8	15261433	rs1390050	intergenic	SGCZ,TUSC3	T	C	0.318732	-35.5047	11.4081	0.001857
13	101926493	rs386597864	intronic	NALCN	T	C	0.404571	-31.5169	10.1272	0.001857
4	6523395	rs4075007	intronic	PPP2R2C	A	G	0.401738	-32.4616	10.4327	0.001861
5	141243646	rs3797054	exonic	PCDH1	A	G	0.710337	-37.1405	11.9371	0.001862
6	4514161	---	intergenic	LOC100507506,KU-MEL-3	T	C	0.712737	-35.8059	11.5078	0.001862
12	118196382	rs515398	intronic	KSR2	A	G	0.431302	-32.5729	10.4698	0.001864
1	19050907	---	intronic	PAX7	A	G	0.10494	-55.2075	17.7476	0.001866
11	10722348	rs139119600	intergenic	MRVI1,CTR9	TC	-	0.815607	-40.6934	13.0827	0.001868
11	10724434	rs7129273	intergenic	MRVI1,CTR9	T	C	0.815395	-40.6934	13.0827	0.001868
6	11272532	rs6920739	intronic	NEDD9	G	A	0.788714	-40.8726	13.1405	0.001868
18	3497852	rs238114	UTR3	DLGAP1	G	C	0.735985	-35.8162	11.5166	0.001871
6	161684562	rs56765369	intronic	AGPAT4	C	T	0.79716	-39.4974	12.7011	0.001872
5	107112741	rs6891926	intergenic	EFNA5,FBXL17	A	C	0.75	-35.4637	11.4065	0.001877
1	88213014	rs12139208	intergenic	LINC01364,PKN2-AS1	T	C	0.8498	-43.3654	13.9488	0.001878
3	94410651	rs34279413	intergenic	NSUN3,LINC00879	-	AA	0.347471	-33.4097	10.7476	0.00188
6	2536877	rs1680862	intergenic	GMDS-AS1,C6orf195	A	G	0.923797	-66.7585	21.4809	0.001885
19	53846714	rs10422675	intronic	ZNF845	G	A	0.678819	-33.2819	10.7147	0.001895
3	176775075	rs146472462	intronic	TBL1XR1	T	C	0.143201	-46.9726	15.1226	0.001896
3	179909533	rs10222466	intergenic	PEX5L,TTC14	T	C	0.273701	-37.1435	11.9581	0.001896
9	96523092	rs34624092	intergenic	PHF2,MIR4291	A	G	0.457464	-33.0426	10.6403	0.0019
8	64207946	rs12541242	intergenic	YTHDF3,LINC01289	G	A	0.535179	-32.0209	10.3112	0.0019
14	30022094	rs35129794	ncRNA_intronic	MIR548AI	C	T	0.104729	-56.8862	18.3228	0.001905
7	132971503	rs60498338	intronic	EXOC4	T	C	0.544882	-31.553	10.1632	0.001905
6	46626353	rs953062	intronic	SLC25A27	G	A	0.39364	-34.3438	11.0625	0.001906
12	49480948	rs2117028	intergenic	RHEBL1,DHH	G	A	0.775918	-41.0693	13.2293	0.001906
3	179990811	rs4854907	intergenic	PEX5L,TTC14	A	G	0.289952	-37.4344	12.0581	0.001906
13	108473248	rs7994757	ncRNA_intronic	FAM155A-IT1	A	G	0.213351	-40.6867	13.1073	0.001908
6	22583857	rs35541991	intergenic	HDGFL1,NRSN1	A	-	0.689094	-35.2393	11.3528	0.001909
6	22603610	rs6456498	intergenic	HDGFL1,NRSN1	G	A	0.684317	-35.2393	11.3528	0.001909
20	4967393	rs2326576	intronic	SLC23A2	T	C	0.174906	-42.8684	13.8127	0.001912
17	75095242	rs2292852	intronic	SEC14L1	G	A	0.525401	-30.424	9.80331	0.001913
2	19504721	rs4666325	intergenic	NT5C1B-RDH14,MIR4757	T	C	0.70219	-35.1181	11.316	0.001913
3	32263237	rs150502679	intergenic	GPD1L,CMTM8	C	G	0.820941	-47.1873	15.2063	0.001915
16	76883566	rs1546183	intergenic	LOC101928203,MIR4719	C	T	0.288925	-34.0004	10.9573	0.001916
5	109714115	---	intergenic	LOC100289673,TMEM232	T	-	0.738979	-35.7277	11.5148	0.001917
8	62605506	rs200119965	intronic	ASPH	C	G	0.0525261	-68.0012	21.9178	0.001919
8	62597687	rs11775077	intronic	ASPH	A	G	0.0523225	-68.0012	21.9178	0.001919
7	149534216	rs57307418	intergenic	SSPO,ZNF862	G	A	0.224506	-37.8752	12.2077	0.001919
17	46238276	rs11079812	intronic	SKAP1	G	A	0.613812	-33.6268	10.8399	0.001921
1	38741805	rs77660959	intergenic	LINC01343,RRAGC	G	A	0.903738	-50.0194	16.1273	0.001925
8	6064250	rs4587350	intergenic	CSMD1,LOC100287015	A	G	0.103738	-52.928	17.07	0.001931
13	22840347	rs2476512	ncRNA_intronic	LINC00540	T	C	0.328284	-33.8081	10.9045	0.001933
14	34225709	rs76665380	intronic	NPAS3	G	A	0.946715	-64.6049	20.8404	0.001935
7	82126741	rs149408720	intergenic	CACNA2D1,PCLO	C	T	0.863187	-46.9741	15.1527	0.001935
15	78523161	rs147277076	intronic	ACSBG1	-	TTCT	0.246019	-38.0058	12.2621	0.001939
22	27727106	rs4822868	intergenic	LINC01422,MN1	A	C	0.512231	-33.1124	10.6832	0.001939
13	67587855	rs146056006	intronic	PCDH9	C	-	0.717426	-34.7145	11.2012	0.00194
7	137770675	rs75314391	intronic	AKR1D1	C	A	0.884688	-46.1978	14.9077	0.001942
4	141785159	rs11100679	intergenic	TBC1D9,RNF150	G	C	0.889334	-51.9402	16.7614	0.001943
17	78257591	rs4073111	intronic	RNF213	C	G	0.559759	-32.1945	10.3898	0.001944
10	77536364	rs16932635	intergenic	LOC101929234,C10orf11	T	C	0.671921	-34.0256	10.9812	0.001945
12	129624648	rs7956184	intronic	TMEM132D	A	G	0.0892571	-59.9624	19.3548	0.001948
7	31460476	rs4723075	intergenic	NEUROD6,CCDC129	A	C	0.619389	-32.7757	10.5824	0.001954
10	117663083	rs142689380	intronic	ATRNL1	G	A	0.91256	-57.4865	18.5619	0.001955
2	47581174	---	intergenic	LOC101927043,EPCAM	T	-	0.213386	-40.0994	12.9498	0.001958
1	209782343	rs11119314	exonic	CAMK1G	G	A	0.653826	-33.735	10.8969	0.001963
8	15051928	rs2168128	intronic	SGCZ	T	C	0.235491	-36.6578	11.841	0.001963
19	46080275	rs1079271	intronic	OPA3	C	T	0.848424	-44.0069	14.2161	0.001964
13	77947139	rs1927403	intergenic	MYCBP2,SCEL	T	G	0.228456	-40.016	12.928	0.001966
4	37912719	rs13107074	intronic	TBC1D1	C	A	0.641979	-33.393	10.7889	0.001967
12	118312000	rs186682222	intronic	KSR2	T	C	0.934579	-68.3628	22.0935	0.001973
1	217396743	---	intergenic	ESRRG,GPATCH2	A	G	0.0656836	-63.7885	20.6181	0.001976
19	57132456	rs2075167	intronic	ZNF71	C	A	0.751403	-36.3572	11.7518	0.001976
4	86808386	rs17011131	intronic	ARHGAP24	A	G	0.604167	-33.9078	10.9616	0.001979
7	32389059	rs61245071	intergenic	PDE1C,LOC100130673	T	C	0.169614	-44.6395	14.4329	0.001982
15	81748180	rs72743843	intergenic	LOC101929655,MEX3B	G	A	0.756341	-38.4204	12.4219	0.001982
13	109089069	rs61973476	intergenic	TNFSF13B,MYO16	T	C	0.772143	-39.1145	12.6468	0.001983
4	99496673	rs112629954	intronic	TSPAN5	-	TC	0.399226	-34.6511	11.2042	0.001984
2	240836148	rs6737883	intergenic	LOC150935,MIR4786	T	C	0.502138	-33.23	10.7451	0.001984
7	88105760	---	intergenic	STEAP4,ZNF804B	G	A	0.359471	-32.7942	10.6047	0.001985
4	31216203	rs16884584	intergenic	PCDH7,NONE	T	C	0.936695	-62.5425	20.224	0.001985
9	82592333	rs11138436	ncRNA_intronic	LOC101927477	T	C	0.734972	-35.8639	11.5976	0.001986
2	199397958	rs115562497	intergenic	LOC101927619,SATB2	A	T	0.781969	-39.6874	12.8356	0.001988
20	19355809	rs7263597	intronic	SLC24A3	G	A	0.879172	-46.3028	14.9758	0.001989
1	230327766	rs6678450	intronic	GALNT2	C	T	0.130161	-47.4196	15.3386	0.001991
7	43910787	rs2730611	intronic	URGCP-MRPS24	A	G	0.0563739	-67.3834	21.7958	0.001991
12	52291354	rs4761835	intergenic	ANKRD33,ACVRL1	T	C	0.348756	-33.0663	10.6957	0.001991
7	154658504	rs3823529	intronic	DPP6	T	G	0.0992244	-50.6248	16.3758	0.001992
12	131469734	rs10848262	intronic	GPR133	A	G	0.302281	-34.287	11.0919	0.001994
2	87547782	rs144424509	intergenic	LOC285074,LINC00152	G	A	0.861986	-46.7434	15.1225	0.001995
17	59403590	rs16945139	intronic	BCAS3	G	A	0.107525	-54.3322	17.5776	0.001995
5	110693589	---	intronic	CAMK4	G	A	0.0587921	-73.1404	23.6653	0.001997
12	125238811	---	intergenic	NCOR2,SCARB1	C	T	0.447446	-31.87	10.3137	0.002001
12	105192655	rs2453170	intergenic	CHST11,SLC41A2	C	T	0.57681	-33.476	10.8341	0.002002
11	114732135	rs4936307	intergenic	NXPE2,CADM1	C	A	0.260375	-36.3104	11.7513	0.002002
12	49444545	rs2241726	exonic	KMT2D	G	A	0.81605	-43.7076	14.1467	0.002004
4	27239274	rs13121254	intergenic	STIM2,MIR4275	T	C	0.711533	-35.4818	11.4872	0.00201
X	45170505	rs181391821	intergenic	CXorf36,LINC01204	A	G	0.873898	-37.4721	12.1324	0.002011
6	33731787	rs943466	intergenic	IP6K3,LEMD2	G	A	0.406651	-32.8534	10.6379	0.002013
1	241078538	rs138312282	intronic	RGS7	A	G	0.207799	-38.1528	12.3549	0.002015
1	34679066	rs4652997	intronic	C1orf94	A	G	0.911883	-53.0467	17.1781	0.002015
19	53593449	rs36001188	intronic	ZNF160	T	C	0.473988	-33.4961	10.8497	0.00202
17	26412824	rs4420579	intronic	NLK	T	C	0.906008	-52.6735	17.0626	0.002021
6	10425031	---	intergenic	TFAP2A,LINC00518	T	C	0.569842	-32.3522	10.4817	0.002025
12	8189880	rs10846377	intronic	FOXJ2	T	G	0.220738	-38.5776	12.4996	0.002027
12	49389476	rs3741619	UTR3	DDN	G	A	0.815789	-43.8894	14.2233	0.002031
8	67101269	rs4419797	intergenic	CRH,LINC00967	C	T	0.536383	-31.6401	10.257	0.002037
8	67107618	rs61548292	ncRNA_intronic	LINC00967	A	-	0.537413	-31.6401	10.257	0.002037
5	52292477	rs3212392	intronic	ITGA2	C	T	0.428209	-30.8423	9.99891	0.002038
10	78092093	rs16933339	intronic	C10orf11	A	G	0.13271	-44.7471	14.5063	0.002038
20	16681577	rs6135857	intergenic	KIF16B,SNRPB2	T	C	0.317207	-33.7444	10.9406	0.00204
2	77595904	rs192634	intronic	LRRTM4	G	A	0.471754	-30.285	9.82	0.002042
7	16572008	rs2301965	intronic	LRRC72	C	T	0.522995	-31.6469	10.2657	0.002051
1	114856300	rs75941965	intergenic	SYT6,TRIM33	T	G	0.881442	-46.3879	15.0484	0.002052
1	163134404	rs6704267	ncRNA_intronic	LOC101928404	C	A	0.763348	-40.2648	13.0632	0.002054
5	88186469	rs9293505	ncRNA_intronic	MEF2C-AS1	G	T	0.847873	-47.3733	15.3711	0.002056
8	24858793	rs3860834	intergenic	NEFL,DOCK5	C	A	0.24312	-38.0176	12.3396	0.002063
20	55165067	rs6024978	intergenic	FAM209B,TFAP2C	A	C	0.312483	-33.7878	10.9668	0.002064
5	127168735	rs245202	intergenic	CTXN3,LINC01184	C	G	0.680567	-34.8752	11.3198	0.002064
2	58564130	rs75942864	intergenic	FANCL,LINC01122	T	C	0.902325	-50.577	16.4168	0.002064
7	90147619	rs4728900	intergenic	CLDN12,CDK14	C	T	0.183641	-39.4721	12.8138	0.002067
22	23597992	rs9620232	intronic	BCR	G	A	0.295589	-35.2833	11.4538	0.002067
7	48617315	rs143160858	intronic	ABCA13	-	TG	0.230176	-38.0169	12.3419	0.002068
7	48579358	rs12113920	intronic	ABCA13	T	G	0.232076	-38.0169	12.3419	0.002068
7	86622970	rs4728656	intronic	KIAA1324L	C	T	0.274358	-34.0322	11.0495	0.00207
13	103345465	rs9514044	intronic	METTL21C	C	T	0.122662	-47.691	15.4871	0.002074
7	32394340	rs3079628	intergenic	PDE1C,LOC100130673	-	AT	0.169829	-44.5156	14.4567	0.002075
2	26778638	rs10192160	intronic	OTOF	G	C	0.107592	-52.7943	17.146	0.002076
15	52521383	rs62623565	exonic	MYO5C	C	T	0.906868	-59.9331	19.464	0.002076
15	52531813	rs17707007	intronic	MYO5C	T	C	0.907501	-59.9332	19.464	0.002076
17	45956804	rs180926671	intergenic	SP6,SP2	A	T	0.27441	-35.8449	11.6424	0.002078
11	118100700	rs3062199	intronic	MPZL3	AT	-	0.616907	-33.3758	10.8417	0.002081
11	118116496	rs11605435	intronic	MPZL3	T	C	0.617388	-33.3758	10.8417	0.002081
21	18236454	rs2824099	intergenic	LINC00478,C21orf37	A	C	0.608626	-34.1751	11.1025	0.002083
22	32877682	rs201567999	intronic	FBXO7	A	-	0.791463	-38.9234	12.6449	0.002083
1	149050264	rs61787789	ncRNA_intronic	NBPF25P	T	C	0.143203	-44.2894	14.3896	0.002085
15	53150050	---	intergenic	ONECUT1,WDR72	T	C	0.944622	-72.562	23.5809	0.00209
15	53157229	---	intergenic	ONECUT1,WDR72	C	T	0.944993	-72.562	23.5809	0.00209
22	34155472	rs118187983	intronic	LARGE	C	T	0.091237	-52.5828	17.0881	0.00209
3	189261517	rs12486199	intergenic	TPRG1,TP63	A	G	0.218808	-39.9648	12.9898	0.002094
11	11226112	rs7948621	intergenic	ZBED5-AS1,GALNT18	C	A	0.380385	-32.9395	10.7064	0.002094
19	47338505	rs7256313	intergenic	SNAR-E,AP2S1	G	A	0.0796153	-66.1731	21.5086	0.002094
18	28864173	rs111513798	intergenic	DSC1,DSG1	T	C	0.0779706	-61.3752	19.9509	0.002096
4	89147868	rs150802709	intronic	ABCG2	A	G	0.171074	-44.9536	14.6179	0.002103
15	31821275	rs79161733	intronic	OTUD7A	A	G	0.410614	-32.2939	10.5025	0.002106
14	22782681	rs75542890	intergenic	OR4E2,DAD1	T	G	0.0615138	-64.4639	20.9707	0.002112
3	196742290	rs9855410	exonic	MFI2	T	C	0.902029	-54.4491	17.713	0.002112
1	247560979	rs10802495	intergenic	ZNF496,NLRP3	C	A	0.329053	-35.0158	11.3914	0.002113
14	72316402	rs11158915	intergenic	SIPA1L1,RGS6	T	G	0.427389	-32.3364	10.5206	0.002115
7	23623862	rs13232005	downstream	CLK2P	C	T	0.117978	-49.3669	16.062	0.002116
22	48227923	rs17617384	ncRNA_intronic	LOC284930	G	A	0.19992	-36.0103	11.7173	0.002117
6	115026310	rs7745314	intergenic	HS3ST5,FRK	C	A	0.417447	-32.2573	10.497	0.002119
6	132865549	rs2840830	intergenic	TAAR9,TAAR8	T	C	0.777718	-36.8532	11.9951	0.002124
12	84803241	rs138113691	intergenic	TMTC2,SLC6A15	C	T	0.940279	-71.649	23.3219	0.002125
2	76243552	rs6755642	intergenic	GCFC2,LRRTM4	C	T	0.902563	-59.079	19.2329	0.002128
15	38427638	rs11634456	intergenic	LOC101928227,SPRED1	C	T	0.334537	-33.536	10.9179	0.002129
15	24033252	rs144249327	intergenic	NDN,PWRN2	TTCT	-	0.640043	-32.1582	10.4709	0.002132
3	26471474	rs7619880	intergenic	LINC00692,LRRC3B	T	C	0.824826	-43.433	14.1434	0.002134
4	37922307	rs2925957	intronic	TBC1D1	G	C	0.796242	-40.2147	13.0953	0.002134
3	75463915	rs144851442	intergenic	MIR4444-1,FAM86DP	C	A	0.915309	-59.4612	19.3634	0.002135
17	46005464	rs187872777	ncRNA_UTR3	SP2	A	G	0.266497	-36.4067	11.8577	0.002138
8	96693539	rs146305340	ncRNA_intronic	C8orf37-AS1	AAG	-	0.722964	-35.2943	11.496	0.00214
20	10892348	rs6074201	intergenic	LOC101929413,LOC339593	C	G	0.701951	-35.6608	11.6167	0.002142
8	136532459	rs11166596	intronic	KHDRBS3	T	C	0.37607	-32.7791	10.6788	0.002144
1	108215310	rs17019693	intronic	VAV3	C	T	0.731655	-37.2324	12.13	0.002145
12	130309991	rs73160240	intronic	TMEM132D	T	A	0.223438	-38.3719	12.5023	0.002146
2	31213679	rs2241427	intronic	GALNT14	G	A	0.340642	-33.3694	10.8743	0.00215
7	9104692	rs2189866	intergenic	NXPH1,PER4	C	T	0.934626	-69.1541	22.5369	0.002152
5	56727674	rs10940559	intergenic	GPBP1,ACTBL2	G	A	0.880781	-52.3011	17.0448	0.002152
16	72274908	rs9930820	intergenic	PMFBP1,ZFHX3	C	G	0.189222	-38.7607	12.6327	0.002153
4	32640652	rs9995527	intergenic	PCDH7,NONE	T	C	0.129877	-44.8807	14.6282	0.002154
1	247713661	rs116822129	intronic	GCSAML	C	T	0.155288	-47.202	15.3876	0.002158
6	161621784	rs3798930	intronic	AGPAT4	G	A	0.878173	-46.6538	15.213	0.002164
6	156801876	rs2493239	intergenic	NOX3,ARID1B	G	A	0.491437	-31.9833	10.4296	0.002165
2	58119475	rs4144044	intergenic	CCDC85A,VRK2	A	G	0.278684	-36.2964	11.84	0.002172
19	17924918	rs36075281	downstream	B3GNT3	G	A	0.83525	-42.0384	13.7132	0.002173
6	161562397	rs57231061	intronic	AGPAT4	T	C	0.834713	-44.1911	14.4157	0.002173
9	26207267	rs1434883	intergenic	LOC100506422,CAAP1	G	A	0.0756189	-63.965	20.8658	0.002173
17	75033715	rs73996873	intergenic	MGAT5B,SEC14L1	A	G	0.0698795	-70.6788	23.059	0.002176
5	23112301	rs141220567	intergenic	CDH12,PRDM9	AAAT	-	0.910986	-57.4425	18.7415	0.002177
5	23124187	rs9293055	intergenic	CDH12,PRDM9	A	G	0.910819	-57.4425	18.7415	0.002177
6	161555840	rs10945713	UTR3	AGPAT4	C	T	0.868287	-44.7361	14.5973	0.002179
9	36941431	rs7047780	intronic	PAX5	G	A	0.815122	-39.6251	12.9304	0.00218
18	11572327	rs79367782	intergenic	LINC01255,SLC35G4P	G	A	0.643812	-32.3037	10.5415	0.002181
9	31715443	---	intergenic	LINC01242,ACO1	CCTCTTT	-	0.943984	-69.6185	22.7185	0.002181
14	81620883	rs28441485	intergenic	TSHR,GTF2A1	T	G	0.33993	-33.3634	10.8896	0.002185
1	109793851	rs149311467	exonic	CELSR2	G	T	0.804702	-40.0992	13.0903	0.002189
20	633149	rs6116961	intronic	SRXN1	G	A	0.777244	-37.5978	12.2768	0.002195
9	16568780	rs1952346	intronic	BNC2	G	A	0.888235	-51.6219	16.8575	0.002197
12	118036758	rs7313062	intronic	KSR2	C	T	0.364547	-34.1342	11.1501	0.002204
13	84624912	rs9319013	intergenic	SLITRK1,LINC00333	C	T	0.187133	-39.4284	12.8798	0.002204
X	65408445	rs6624875	intronic	HEPH	C	T	0.929468	-49.9455	16.3185	0.002208
6	124180018	rs6932634	intronic	NKAIN2	A	C	0.203188	-41.3575	13.5138	0.00221
2	22468823	rs79541149	intergenic	LOC645949,LOC102723362	C	G	0.0831554	-60.6812	19.8276	0.00221
17	8801043	rs61759639	intronic	PIK3R5	C	G	0.911898	-52.3803	17.1175	0.002213
6	67049879	rs72885664	intergenic	SLC25A51P1,NONE	T	C	0.691845	-34.1177	11.1504	0.002215
4	178798761	rs10021886	ncRNA_intronic	LINC01098,LINC01099	C	T	0.78287	-38.4866	12.5781	0.002215
10	78007805	rs35809507	intronic	C10orf11	T	C	0.855063	-43.5745	14.2438	0.002219
2	134417558	rs115967978	intergenic	NCKAP5,MIR3679	A	G	0.808278	-41.8941	13.6943	0.002219
6	67502788	rs116897148	intergenic	SLC25A51P1,BAI3	C	T	0.113114	-55.1753	18.0369	0.002221
16	2115819	---	intronic	TSC2	A	G	0.118889	-52.1956	17.0637	0.002222
22	43092912	rs3761464	intronic	A4GALT	T	C	0.141043	-41.1269	13.4472	0.002225
16	18632356	rs7405346	intergenic	ABCC6P1,RPS15A	A	C	0.715569	-36.5604	11.9547	0.002226
8	6068274	rs6992412	intergenic	CSMD1,LOC100287015	A	G	0.086631	-57.632	18.8447	0.002226
1	229685509	rs36058471	intronic	ABCB10	TT	-	0.558525	-32.3093	10.566	0.002229
5	11716254	rs141860609	intronic	CTNND2	G	A	0.882644	-51.7126	16.9121	0.00223
18	74391057	rs4891187	intergenic	LOC101927651,LOC400661	C	G	0.547185	-31.6876	10.3637	0.002232
15	66884975	rs4776304	ncRNA_intronic	LINC01169	T	C	0.240983	-37.4282	12.2432	0.002235
4	139753368	rs6815616	intergenic	LINC00499,CCRN4L	A	G	0.706205	-33.2786	10.8866	0.002237
18	6541752	rs9950154	ncRNA_intronic	LINC01387	G	A	0.21916	-37.2132	12.1743	0.002238
5	88228378	rs16903411	ncRNA_intronic	MEF2C-AS1	T	G	0.852847	-46.7479	15.2967	0.002243
2	56484164	rs4671277	intronic	CCDC85A	C	T	0.481293	-31.1772	10.2022	0.002244
22	43145466	rs59171526	intergenic	A4GALT,ARFGAP3	C	T	0.768077	-36.3967	11.9105	0.002244
13	83315555	rs76638919	intergenic	NONE,SLITRK1	T	G	0.949266	-72.7357	23.8037	0.002246
6	160669718	rs3912161	intronic	SLC22A2	T	C	0.939018	-69.0998	22.621	0.002253
5	78995703	rs72768863	intronic	CMYA5	T	C	0.521012	-32.2411	10.5569	0.002258
17	15258369	---	intergenic	TEKT3,TVP23C-CDRT4	C	T	0.679001	-34.5835	11.3268	0.002264
12	100390192	rs74525525	intergenic	ANKS1B,UHRF1BP1L	A	G	0.210604	-40.5058	13.2688	0.002268
15	32424169	rs140577272	intronic	CHRNA7	-	CTC	0.222792	-40.2082	13.1718	0.002269
13	103346442	rs3885617	intronic	METTL21C	A	G	0.323041	-33.7453	11.0572	0.002274
11	33949342	rs7103973	intergenic	LMO2,CAPRIN1	T	C	0.180652	-40.1698	13.1641	0.002277
4	6533061	rs4689472	intronic	PPP2R2C	G	A	0.812533	-42.1281	13.8056	0.002277
12	20292214	rs977894	intergenic	LOC100506393,PDE3A	T	C	0.82874	-41.4943	13.6	0.00228
1	108218276	rs2504469	intronic	VAV3	C	T	0.610844	-33.7865	11.0746	0.002282
21	16798841	rs62218408	intergenic	NRIP1,USP25	C	A	0.170187	-42.7431	14.0127	0.002286
9	136934924	rs2427977	intergenic	BRD3,WDR5	G	A	0.716292	-36.2452	11.8836	0.002288
10	134385217	rs189639443	intronic	INPP5A	A	C	0.563835	-32.6177	10.6941	0.002288
15	99107603	rs146885333	intergenic	FAM169B,IGF1R	G	A	0.0840011	-59.5308	19.5199	0.00229
15	99127204	rs141559944	intergenic	FAM169B,IGF1R	A	G	0.0840921	-59.5308	19.5199	0.00229
6	23804128	rs141240722	intergenic	HDGFL1,NRSN1	C	T	0.124565	-46.0287	15.0922	0.00229
8	92878356	---	intergenic	SLC26A7,RUNX1T1	G	C	0.947861	-78.8368	25.8524	0.002292
11	98177964	rs35344911	intergenic	MIR7976,CNTN5	A	G	0.124866	-48.6998	15.9697	0.002292
14	67888692	rs182785205	intergenic	PLEK2,TMEM229B	A	G	0.0831551	-61.0481	20.0199	0.002293
17	31709445	rs7207448	intronic	ASIC2	A	G	0.0718675	-59.2175	19.4199	0.002294
19	31269287	rs183284902	intergenic	ZNF536,TSHZ3	A	G	0.185314	-41.7816	13.7039	0.002297
1	88238041	rs1030742	intergenic	LINC01364,PKN2-AS1	A	G	0.566171	-32.211	10.565	0.002297
2	85971108	rs6750921	intergenic	GNLY,ATOH8	T	C	0.185879	-41.9341	13.7561	0.002301
5	14097292	rs6896801	intergenic	DNAH5,TRIO	G	A	0.579555	-31.2042	10.2366	0.002301
21	44188250	rs68104891	intronic	PDE9A	C	-	0.567513	-31.0408	10.1837	0.002303
2	78845587	rs66490227	intergenic	LOC101927967,REG3G	-	TCTT	0.304731	-33.802	11.0909	0.002306
8	5434935	rs28369420	intergenic	CSMD1,LOC100287015	G	A	0.382652	-31.2861	10.2653	0.002306
11	97056901	rs1690588	intergenic	JRKL-AS1,MIR7976	T	A	0.309193	-34.3081	11.2597	0.002312
22	49911182	rs9616668	intergenic	NONE,C22orf34	C	T	0.7886	-37.5527	12.3258	0.002314
7	13954631	rs66974425	intronic	ETV1	T	C	0.382597	-33.1343	10.8764	0.002316
9	72083489	rs35532555	intronic	APBA1	T	C	0.17651	-43.7212	14.3515	0.002316
5	8418720	rs866152	ncRNA_intronic	LOC729506	T	C	0.444296	-31.4778	10.333	0.002317
5	60883190	rs10058219	intergenic	ZSWIM6,C5orf64	T	C	0.664706	-33.7365	11.0745	0.002317
15	72105544	rs2415120	intronic	NR2E3	G	A	0.405189	-32.2731	10.5953	0.002319
15	84173859	rs10906975	intronic	SH3GL3	G	A	0.694251	-34.6059	11.361	0.002319
6	8072008	rs76290933	ncRNA_intronic	EEF1E1-BLOC1S5	C	T	0.0892952	-51.449	16.8911	0.00232
11	8637191	rs1128559	UTR3	TRIM66	G	C	0.21054	-36.0384	11.8323	0.002321
5	172037490	rs10516134	intergenic	SH3PXD2B,NEURL1B	C	T	0.8748	-47.2014	15.4982	0.002322
16	12597948	rs67054068	intronic	SNX29	C	A	0.906793	-52.2513	17.1559	0.002322
9	94227768	---	intergenic	NFIL3,MIR3910-1	T	-	0.848169	-46.5508	15.2848	0.002322
10	111289799	rs9787509	intergenic	RNU6-53P,XPNPEP1	A	G	0.133199	-47.7407	15.6764	0.002324
20	16708109	rs3787509	intergenic	KIF16B,SNRPB2	T	A	0.441578	-30.4306	9.9928	0.002325
12	118159132	rs1348777	intronic	KSR2	A	G	0.518583	-31.1639	10.2342	0.002326
10	88441708	rs55815121	intronic	LDB3	C	T	0.695913	-33.97	11.1587	0.002332
8	137682484	rs305307	intergenic	KHDRBS3,FAM135B	C	T	0.813587	-42.4247	13.936	0.002333
11	82424372	rs1390978	intergenic	LOC101928989,FAM181B	T	C	0.479742	-30.9146	10.1566	0.002336
3	114203969	rs2055981	ncRNA_intronic	LOC101929754	T	C	0.56016	-32.7506	10.7602	0.002337
13	67527643	rs17195202	intronic	PCDH9	G	T	0.736568	-35.4755	11.6561	0.002338
5	31385936	---	intergenic	CDH6,DROSHA	C	A	0.249733	-36.9371	12.1372	0.00234
8	111051403	rs10505135	intergenic	KCNV1,NONE	T	C	0.0788348	-53.8042	17.682	0.002343
10	36730100	rs12784257	intergenic	LINC01452,ANKRD30A	G	C	0.647821	-34.045	11.1888	0.002344
16	17177321	rs1391351	intergenic	NPIPA7,XYLT1	G	A	0.753606	-35.3703	11.6247	0.002345
10	10859858	rs10905835	intergenic	SFTA1P,LINC00710	A	G	0.250134	-34.2421	11.2551	0.002347
15	100458069	rs2573613	intergenic	DNM1P46,ADAMTS17	A	C	0.273201	-36.3286	11.9417	0.002349
15	45947619	rs6493165	intronic	SQRDL	G	A	0.311746	-35.5141	11.6741	0.002349
2	180971370	rs10497558	intergenic	CWC22,SCHLAP1	C	G	0.925634	-61.9608	20.3684	0.00235
18	66884934	rs35895460	intergenic	CCDC102B,DOK6	A	G	0.239439	-38.6387	12.7021	0.002351
8	18693453	rs11782622	intronic	PSD3	C	T	0.190807	-38.5282	12.6671	0.002353
15	30232542	rs74368288	intergenic	TJP1,GOLGA8J	T	C	0.192893	-40.0973	13.185	0.002357
8	67101240	rs75631689	intergenic	CRH,LINC00967	C	T	0.112714	-47.7231	15.6944	0.00236
17	14301613	rs2323178	intergenic	HS3ST3B1,CDRT7	T	C	0.6295	-32.6548	10.7405	0.002363
5	65137461	rs16894446	intergenic	NLN,ERBB2IP	C	T	0.564425	-32.8974	10.8207	0.002364
22	50603719	rs145167669	intergenic	MOV10L1,PANX2	-	AAAG	0.137008	-47.1441	15.5094	0.002368
16	76053385	rs1909105	intergenic	TERF2IP,CNTNAP4	G	A	0.590471	-33.2565	10.9426	0.002372
8	15259345	rs12542950	intergenic	SGCZ,TUSC3	G	T	0.375735	-32.947	10.8413	0.002373
9	36950029	rs3780163	intronic	PAX5	A	G	0.461642	-32.3424	10.6445	0.002378
9	72174469	rs79765672	intronic	APBA1	T	A	0.166981	-43.9448	14.4631	0.002378
15	30091011	rs45474401	intronic	TJP1	A	G	0.906995	-57.7936	19.0218	0.002379
5	157616208	rs17055363	intergenic	CLINT1,LOC101927697	G	A	0.385695	-33.6362	11.0711	0.00238
17	8735332	rs71371871	intronic	PIK3R6	A	G	0.902778	-51.2978	16.8843	0.00238
12	118234710	rs4766876	intronic	KSR2	G	A	0.512858	-32.9186	10.8355	0.002381
16	79465592	rs7201447	intergenic	WWOX,MAF	C	G	0.922552	-56.3849	18.5611	0.002383
18	23030909	rs7506079	intergenic	ZNF521,SS18	C	G	0.781492	-38.952	12.8221	0.002383
18	23003791	rs35895023	intergenic	ZNF521,SS18	GA	-	0.781901	-38.9521	12.8222	0.002383
6	22741910	rs9348532	intergenic	HDGFL1,NRSN1	G	T	0.634761	-30.966	10.1938	0.002384
9	27910294	rs138459363	intergenic	C9orf72,LINGO2	T	C	0.941676	-65.1215	21.4382	0.002384
15	31464648	rs16956610	intergenic	TRPM1,LOC283710	T	C	0.374766	-33.4162	11.0013	0.002386
15	81754356	rs180964647	intergenic	LOC101929655,MEX3B	T	C	0.894793	-46.8353	15.4203	0.002387
9	74050819	rs12375722	intergenic	TRPM3,TMEM2	C	T	0.551484	-31.104	10.2421	0.00239
5	154746704	rs10058975	intergenic	KIF4B,SGCD	G	T	0.401043	-33.4887	11.028	0.002392
14	21586101	rs12887490	intergenic	ZNF219,OR5AU1	A	G	0.574079	-30.8855	10.1713	0.002393
2	50852770	rs17040906	intronic	NRXN1	A	C	0.799465	-41.2061	13.5703	0.002393
10	102206386	rs76770539	intergenic	LINC00263,WNT8B	-	T	0.167929	-42.0121	13.8361	0.002394
14	95172215	rs28695954	intergenic	SERPINA13P,GSC	G	A	0.91689	-57.8722	19.0599	0.002395
16	89437560	rs889573	intronic	ANKRD11	T	C	0.390078	-32.3465	10.6546	0.002398
17	8982593	rs9901367	intronic	NTN1	G	T	0.326017	-32.9879	10.8657	0.002398
15	99465473	rs3743262	exonic	IGF1R	T	C	0.281208	-36.665	12.0775	0.002399
22	27705687	rs55826249	intergenic	LINC01422,MN1	A	C	0.593558	-33.4578	11.021	0.002399
1	244311943	rs78608976	intergenic	ZBTB18,C1orf100	A	G	0.272302	-36.5493	12.0409	0.002402
8	39585569	rs201996	intronic	ADAM18	A	G	0.395377	-32.2375	10.621	0.002403
22	24834307	rs200817845	ncRNA_exonic	ADORA2A-AS1	AAT	-	0.851377	-46.1308	15.1983	0.002403
15	31663368	rs8027784	intronic	KLF13	C	G	0.551392	-31.5702	10.4009	0.002403
12	132323784	rs10751699	intronic	MMP17	G	T	0.582013	-32.5817	10.735	0.002404
7	90190462	rs993357	intergenic	CLDN12,CDK14	A	G	0.189757	-39.4548	13	0.002405
12	113112650	rs232928	intergenic	PTPN11,RPH3A	T	C	0.505256	-31.1661	10.2696	0.002407
3	178398587	rs75885951	intronic	KCNMB2	C	A	0.217473	-39.2973	12.9492	0.002408
22	46014064	rs134828	intergenic	FBLN1,ATXN10	T	C	0.547874	-31.8842	10.5069	0.002409
1	38925397	rs2248698	intergenic	LINC01343,RRAGC	G	T	0.862383	-44.5829	14.6938	0.002412
2	15409565	rs735447	intronic	NBAS	G	A	0.160299	-43.6488	14.3861	0.002413
18	6510030	rs57979553	intergenic	L3MBTL4,C18orf64	C	T	0.172584	-40.3791	13.3104	0.002416
3	26881548	rs148659023	intergenic	LRRC3B,NEK10	TTA	-	0.238573	-36.022	11.8772	0.002422
3	26879345	rs1488202	intergenic	LRRC3B,NEK10	C	T	0.239898	-36.022	11.8772	0.002422
9	21818617	rs113297738	intronic	MTAP	T	C	0.0582164	-62.6368	20.6573	0.002428
4	164140448	rs201165254	intergenic	NAF1,NPY1R	-	G	0.3126	-33.7119	11.1188	0.00243
19	44198526	rs8111293	intergenic	PLAUR,IRGC	T	G	0.405189	-31.6508	10.4433	0.00244
14	67768587	---	intronic	MPP5	C	T	0.0838235	-60.1255	19.8405	0.002442
8	39567333	rs34687306	intronic	ADAM18	T	C	0.42698	-30.6441	10.1122	0.002442
5	78825689	rs4704561	intergenic	HOMER1,PAPD4	T	G	0.521658	-31.64	10.4413	0.002443
4	164780151	rs978401	intronic	MARCH1	T	A	0.840379	-43.6176	14.3954	0.002446
21	18284079	rs2824117	intergenic	LINC00478,C21orf37	C	A	0.374967	-31.4172	10.3697	0.002448
7	155677943	rs7786445	intergenic	SHH,LOC389602	T	C	0.068924	-55.6795	18.3778	0.002448
2	16815684	rs6761864	intronic	FAM49A	T	C	0.163636	-42.2764	13.9548	0.002449
3	94018746	rs4241463	intergenic	NSUN3,LINC00879	T	C	0.395371	-32.5574	10.7468	0.00245
15	83248250	rs71156036	intronic	CPEB1	-	G	0.37139	-32.7257	10.8032	0.002451
11	2170773	rs10743144	UTR5	IGF2	C	T	0.680668	-34.8117	11.4944	0.002457
15	31853921	rs72726925	intronic	OTUD7A	G	A	0.409164	-31.4307	10.3786	0.002458
3	46731524	rs7615747	intronic	ALS2CL	A	G	0.589252	-33.0226	10.9085	0.002468
16	59681001	rs112554056	intergenic	GOT2,APOOP5	T	-	0.73004	-33.5273	11.0754	0.002469
16	59690404	rs16961231	intergenic	GOT2,APOOP5	T	C	0.728526	-33.5273	11.0754	0.002469
12	130558804	rs10847988	intergenic	LOC100190940,FZD10-AS1	G	A	0.207182	-39.2746	12.9748	0.00247
20	50123757	rs3787189	intronic	NFATC2	C	T	0.552089	-30.2644	9.99917	0.002472
4	138691123	rs7675201	intergenic	PCDH18,LINC00616	G	A	0.113728	-50.8565	16.8032	0.002473
9	16289322	rs6415727	intergenic	C9orf92,BNC2	G	A	0.555183	-31.3848	10.3698	0.002474
16	59883481	rs9924403	intergenic	APOOP5,LOC101927580	G	A	0.262032	-36.8955	12.1924	0.002477
8	144620871	rs3750209	exonic	ZC3H3	G	A	0.123097	-47.7023	15.7653	0.00248
8	59817068	rs1562612	intronic	TOX	G	A	0.0982095	-48.4726	16.0207	0.002481
6	22568930	rs5874875	upstream	HDGFL1	-	AT	0.391281	-31.0888	10.2764	0.002484
3	63442622	rs1376478	ncRNA_intronic	SYNPR-AS1	G	A	0.640909	-33.8243	11.1827	0.002489
X	145240758	rs5920027	intergenic	MIR891A,CXorf51A	A	G	0.0777362	-44.0801	14.5741	0.00249
1	229698973	rs35228210	intergenic	ABCB10,TAF5L	G	-	0.539583	-32.3119	10.6835	0.002491
17	55840174	rs11650287	intergenic	CCDC182,MRPS23	A	G	0.295345	-35.1235	11.6137	0.002492
15	32439006	rs61027465	intronic	CHRNA7	A	G	0.221421	-40.053	13.2436	0.002492
16	73709901	rs146378483	intergenic	LOC100506172,LOC101928035	G	A	0.919533	-53.4279	17.6658	0.002492
7	10951764	rs73061478	intergenic	PER4,NDUFA4	G	A	0.180251	-38.4329	12.7096	0.002495
22	44755650	rs10854823	intergenic	KIAA1644,LOC101927526	A	G	0.375567	-33.531	11.0891	0.002496
2	15826700	rs6733775	intergenic	DDX1,LOC101926966	T	C	0.770577	-36.5986	12.1033	0.002496
7	134030156	rs6977112	intergenic	SLC35B4,AKR1B1	G	A	0.796554	-38.7236	12.8062	0.002496
9	84186297	rs11795364	intergenic	LOC101927477,TLE1	A	G	0.732692	-35.6659	11.7965	0.002499
5	8433227	rs2308021	ncRNA_intronic	LOC729506	CA	-	0.442765	-31.1802	10.3139	0.002502
13	67667051	rs138536478	intronic	PCDH9	T	-	0.714458	-33.797	11.1826	0.002509
2	50659907	rs4971674	intronic	NRXN1	G	A	0.66591	-33.6577	11.1379	0.002512
3	70804138	rs6801516	intergenic	LINC01212,FOXP1	T	C	0.490072	-31.5442	10.4387	0.002512
X	85954175	rs144719313	intronic	DACH2	T	A	0.812082	-34.2148	11.3233	0.002514
8	15147301	rs67361343	intergenic	SGCZ,TUSC3	-	TG	0.203158	-38.832	12.8528	0.002517
14	25935161	rs7154982	intergenic	STXBP6,NOVA1	A	G	0.251336	-35.6336	11.7954	0.00252
8	15169588	rs10090191	intergenic	SGCZ,TUSC3	G	A	0.467491	-30.6848	10.1581	0.002522
8	18957688	rs12056348	intergenic	PSD3,LOC100128993	G	C	0.65854	-33.6847	11.1527	0.002525
8	96706501	rs34897900	ncRNA_intronic	C8orf37-AS1	-	G	0.298824	-33.7823	11.1851	0.002525
3	176819833	rs78811724	intronic	TBL1XR1	T	C	0.936716	-64.3687	21.3125	0.002526
17	65702132	rs77178670	intergenic	PITPNC1,NOL11	C	T	0.75288	-35.4337	11.7343	0.00253
17	46345760	rs2938474	intronic	SKAP1	T	G	0.68989	-34.5506	11.4424	0.002532
15	40198877	rs169329	intronic	GPR176	G	A	0.241052	-33.786	11.1901	0.002534
11	70421933	rs10793151	intronic	SHANK2	T	C	0.40508	-31.714	10.504	0.002534
7	148635117	rs9986856	intergenic	EZH2,PDIA4	G	A	0.321113	-34.5711	11.4513	0.002536
7	154653219	rs6954087	intronic	DPP6	A	G	0.109183	-47.2608	15.6547	0.002537
3	32431066	rs9877410	intergenic	CMTM8,CMTM7	A	G	0.381881	-32.1254	10.6417	0.002538
6	168057909	rs62425985	intergenic	TCP10,LOC401286	G	A	0.595429	-32.7137	10.8372	0.002539
18	70836524	rs7359790	ncRNA_intronic	LOC400655	G	A	0.638755	-33.7697	11.1869	0.002539
1	160646357	rs4656925	intergenic	SLAMF1,CD48	C	T	0.795485	-42.0562	13.9327	0.00254
11	29413728	rs792520	intergenic	MIR8068,KCNA4	C	T	0.813002	-38.7113	12.8249	0.002541
17	8774188	rs9911857	intergenic	PIK3R6,PIK3R5	G	A	0.89113	-49.74	16.479	0.002541
11	29424416	rs60621510	intergenic	MIR8068,KCNA4	AACA	-	0.811278	-38.6313	12.8005	0.002545
3	36794597	rs7632683	intergenic	DCLK3,TRANK1	T	C	0.0753809	-57.6106	19.0901	0.002546
10	24832885	rs3748218	exonic	KIAA1217	T	C	0.28348	-34.4077	11.4019	0.002547
10	78457990	rs2395423	intergenic	C10orf11,KCNMA1	A	G	0.198315	-40.3573	13.3752	0.00255
4	125558223	rs59106012	intergenic	LOC101927087,ANKRD50	T	C	0.609818	-31.4005	10.4077	0.002553
11	92801894	rs16918472	intergenic	MTNR1B,SLC36A4	G	A	0.512684	-30.8399	10.222	0.002553
11	3643739	rs3061886	intergenic	LOC650368,TRPC2	AT	-	0.839786	-40.7997	13.5252	0.002557
17	41065975	rs76156285	UTR3	G6PC	G	A	0.947073	-72.9719	24.1909	0.002557
5	113482833	rs4645324	intergenic	YTHDC2,KCNN2	T	C	0.100803	-49.4175	16.3823	0.002557
20	57945730	---	intergenic	EDN3,PHACTR3	T	C	0.564991	-33.1533	10.9911	0.002558
3	30592668	rs6795494	intergenic	RBMS3,TGFBR2	G	A	0.380438	-31.1693	10.3346	0.002561
1	187436371	rs66621905	intergenic	PLA2G4A,NONE	-	CTA	0.195379	-39.5209	13.1036	0.002561
10	66314543	rs10822312	intergenic	REEP3,ANXA2P3	G	T	0.594793	-32.2589	10.6971	0.002564
9	16658278	---	intronic	BNC2	ACAG	-	0.791111	-39.8334	13.2087	0.002564
8	136546338	rs138638426	intronic	KHDRBS3	-	A	0.351061	-32.7024	10.8446	0.002565
17	49943598	rs1263893	intronic	CA10	G	A	0.799572	-36.1995	12.0044	0.002565
7	31353401	---	intergenic	ADCYAP1R1,NEUROD6	A	G	0.0775908	-55.6242	18.4455	0.002565
5	155910944	rs11304197	intronic	SGCD	G	-	0.692523	-34.0928	11.3071	0.002568
11	2933065	rs4930028	intronic	SLC22A18	C	A	0.300162	-34.5903	11.4726	0.00257
3	143166869	rs67392581	intronic	SLC9A9	A	G	0.245652	-37.2446	12.3539	0.002572
4	110209365	rs2214375	intronic	COL25A1	A	C	0.689337	-32.279	10.7079	0.002574
6	32282854	rs6910071	intronic	C6orf10	A	G	0.756366	-37.148	12.3247	0.002577
9	132306633	rs145159543	intergenic	LINC00963,NTMT1	A	G	0.05	-74.0663	24.5776	0.002582
10	118965210	rs1678037	intronic	KCNK18	C	T	0.234617	-40.7467	13.5226	0.002585
22	27673159	rs134805	intergenic	LINC01422,MN1	G	A	0.473143	-30.927	10.2653	0.002589
15	33722464	rs72725484	intronic	RYR3	G	A	0.794975	-38.2696	12.7095	0.002603
1	66736142	rs17128715	intronic	PDE4B	A	G	0.171257	-40.2558	13.369	0.002603
14	22964880	rs226986	intergenic	OR4E2,DAD1	C	A	0.0728026	-58.3698	19.3856	0.002604
14	25942829	rs12432376	intergenic	STXBP6,NOVA1	G	A	0.241508	-35.6481	11.8392	0.002604
2	68324127	rs11126175	intergenic	C1D,WDR92	T	G	0.413171	-30.7115	10.2004	0.002605
17	12564611	rs1548660	intergenic	LINC00670,MYOCD	C	T	0.452833	-31.7049	10.5332	0.002612
6	154888288	rs9383715	intergenic	CNKSR3,SCAF8	C	T	0.601778	-32.4646	10.7853	0.002612
7	94444750	rs1926095	intergenic;intergenic	PEG10,PPP1R9A	A	G	0.295667	-33.1695	11.0214	0.002616
9	34818833	rs141986427	intergenic	FAM205A,FAM205B	C	A	0.0599091	-64.7395	21.5123	0.002618
7	116402733	rs17138983	intronic	MET	G	A	0.149866	-43.076	14.3144	0.002619
17	77422679	rs8076227	intronic	RBFOX3	G	T	0.548853	-30.9471	10.2839	0.002619
12	19149370	rs10743299	intergenic	CAPZA3,PLEKHA5	C	G	0.880882	-46.0834	15.3162	0.002623
16	50413232	rs8060063	intergenic	BRD7,NKD1	G	A	0.639134	-32.6053	10.8368	0.002623
11	33522613	rs2615938	intergenic	HIPK3,KIAA1549L	C	T	0.288025	-33.6193	11.1746	0.002625
4	32654299	rs79084137	intergenic	PCDH7,NONE	A	C	0.120123	-45.1123	14.9953	0.002626
6	53044379	rs9382181	intergenic	GCM1,ELOVL5	G	A	0.231437	-36.0916	11.9974	0.002627
4	89228383	rs7660693	intergenic	PPM1K,HERC6	C	T	0.366702	-32.4434	10.785	0.002628
14	25690496	rs1461555	intergenic	STXBP6,NOVA1	T	C	0.276129	-35.5344	11.8131	0.002629
7	90317673	rs1858763	intronic	CDK14	T	C	0.790409	-39.2776	13.0584	0.002631
22	43641737	rs17516862	intronic	SCUBE1	A	G	0.411969	-30.2118	10.045	0.002633
17	64963463	rs117424134	intronic	CACNG4	G	A	0.931836	-64.2312	21.357	0.002634
5	173594254	rs13169574	intergenic	HMP19,MSX2	C	T	0.274379	-34.3598	11.4249	0.002635
10	44105044	rs10899836	intronic	ZNF485	A	G	0.27843	-36.4056	12.1058	0.002636
5	77129500	rs353972	intergenic	TBCA,LOC101929154	G	T	0.260829	-37.6961	12.5358	0.002638
8	65983392	rs12678249	intergenic	CYP7B1,LINC00251	C	T	0.574826	-30.445	10.1246	0.002638
13	98021849	rs9516919	intronic	MBNL2	C	T	0.532353	-29.9018	9.94465	0.00264
11	92209853	rs1941438	intronic	FAT3	T	G	0.668272	-32.1165	10.6819	0.002642
3	93999959	rs34697039	intergenic	NSUN3,LINC00879	-	A	0.37313	-33.0277	10.9866	0.002645
1	208229228	rs11118979	intronic	PLXNA2	G	T	0.441468	-30.3038	10.0808	0.002646
X	30428541	rs9887430	intergenic	NR0B1,CXorf21	T	C	0.613728	-24.9503	8.30002	0.002647
10	78158137	rs1907337	intronic	C10orf11	C	T	0.213827	-37.1138	12.3465	0.002647
16	60017786	rs12447518	ncRNA_intronic	LOC101927580	G	A	0.178524	-40.7238	13.5475	0.002647
22	42939708	rs5758798	intergenic	RRP7A,SERHL2	G	A	0.14949	-39.8862	13.2698	0.002649
15	83267981	rs783529	intronic	CPEB1	G	A	0.37149	-32.4082	10.7824	0.00265
8	15027115	rs11356258	intronic	SGCZ	-	G	0.234358	-35.7166	11.8841	0.002652
9	14346394	rs12338722	intronic	NFIB	G	C	0.934893	-62.9922	20.9611	0.002654
5	180663134	---	downstream	GNB2L1,TRIM41	AGTC	-	0.279915	-33.3227	11.0903	0.002659
3	70884086	rs11128197	intergenic	LINC01212,FOXP1	T	C	0.370713	-32.722	10.8904	0.002659
5	173594770	rs17076911	intergenic	HMP19,MSX2	G	A	0.273408	-33.5947	11.1814	0.00266
17	77381431	rs8070973	intronic	RBFOX3	A	C	0.541199	-30.0867	10.0139	0.00266
16	17199665	rs4238652	UTR3	XYLT1	T	C	0.637728	-32.6501	10.8677	0.002662
10	57892777	rs2454994	intergenic	MTRNR2L5,ZWINT	C	T	0.281192	-35.2837	11.7449	0.002663
9	77252271	rs77956998	intronic	RORB	C	T	0.806542	-37.2342	12.3949	0.002665
14	79792521	rs189261623	intronic	NRXN3	A	G	0.927236	-59.8761	19.9342	0.002667
13	36858016	rs3818459	intronic	CCDC169,CCDC169-SOHLH2	T	C	0.253141	-37.3182	12.4255	0.00267
9	7569747	rs12553836	intergenic	KDM4C,TMEM261	C	T	0.864681	-46.5776	15.509	0.002671
17	12715753	rs192718636	intronic	ARHGAP44	G	A	0.168894	-42.4566	14.1385	0.002674
1	162551486	rs12736865	intronic	UAP1	C	T	0.318899	-33.9926	11.3204	0.002675
12	118333144	rs61945384	intronic	KSR2	G	A	0.664973	-34.5591	11.5093	0.002676
6	57496087	rs2894924	intronic	PRIM2	A	G	0.429365	-32.3699	10.781	0.002678
4	44713714	rs143805744	intronic	GNPDA2	T	C	0.90008	-50.4073	16.7889	0.002678
2	160853899	rs12692580	intronic	PLA2R1	A	G	0.426663	-31.6084	10.5279	0.002679
13	51363411	rs593407	intronic	DLEU7	A	G	0.0929736	-50.813	16.9253	0.00268
1	18873615	rs2816036	intergenic	KLHDC7A,PAX7	C	A	0.768058	-38.8903	12.9542	0.002681
8	65796677	rs7840142	intergenic	CYP7B1,LINC00251	G	A	0.560813	-31.2736	10.4183	0.002684
10	85802087	rs80313053	intergenic	NRG3,GHITM	C	T	0.650281	-32.2164	10.7327	0.002685
5	52335140	rs34190363	intronic	ITGA2	-	A	0.464762	-29.5959	9.86087	0.002688
19	54876749	rs140979146	intronic	LAIR1	T	C	0.380743	-31.7804	10.5888	0.002688
14	33294781	rs2300861	intronic	AKAP6	C	T	0.305541	-34.3228	11.4369	0.002691
5	127864312	rs62390666	intronic	FBN2	T	C	0.779337	-35.7447	11.9122	0.002694
8	2462516	rs77028988	intergenic	MYOM2,CSMD1	G	T	0.773762	-38.882	12.9583	0.002695
2	199856088	rs11690303	intergenic	LOC101927619,SATB2	A	C	0.223176	-37.4557	12.4832	0.002695
3	5739586	rs10212568	intergenic	MIR4790,LOC101927347	C	T	0.645518	-32.4353	10.8116	0.0027
1	108235719	rs7530592	intronic	VAV3	G	T	0.635381	-32.9172	10.9758	0.002708
20	5020018	rs35786764	intergenic	SLC23A2,TMEM230	T	C	0.106073	-48.5437	16.1866	0.002709
13	106213914	rs77462937	intergenic	DAOA-AS1,LINC00343	G	T	0.0712567	-59.7445	19.923	0.002711
12	130306222	rs34097861	intronic	TMEM132D	-	A	0.242716	-36.5328	12.1825	0.002711
2	216220870	rs35671754	intergenic	ATIC,FN1	G	T	0.721108	-33.8193	11.278	0.002711
1	195993751	rs930732	intergenic	NONE,KCNT2	A	G	0.415709	-31.9639	10.6596	0.002712
7	157314054	rs917736	intergenic	LOC101927914,PTPRN2	C	T	0.79585	-37.5874	12.5361	0.002715
12	133072330	rs116006088	intronic	FBRSL1	T	G	0.777629	-35.4356	11.8204	0.002719
22	25077432	rs4378906	intergenic	POM121L10P,PIWIL3	A	G	0.592588	-31.0891	10.3715	0.002722
5	18880112	rs75472876	intergenic	LOC401177,CDH18	-	CTT	0.155716	-42.4849	14.1742	0.002723
5	18866355	rs34679107	intergenic	LOC401177,CDH18	T	C	0.155582	-42.4849	14.1742	0.002723
5	43297032	rs3733768	intronic	HMGCS1	C	T	0.670418	-33.7414	11.2617	0.002734
5	43315062	rs141358295	intergenic	HMGCS1,CCL28	AC	-	0.663767	-33.7414	11.2617	0.002734
13	46419571	rs6561270	intronic	SIAH3	A	G	0.124265	-48.6764	16.2493	0.002739
22	39053342	---	intronic	CBY1	T	C	0.942338	-71.8229	23.9765	0.00274
3	196751474	rs2280296	intronic	MFI2	T	C	0.267193	-36.0487	12.035	0.002742
16	17127101	rs10852388	intergenic	NPIPA7,XYLT1	C	T	0.779573	-35.9774	12.013	0.002746
9	34630310	rs62557480	intergenic	ARID3C,SIGMAR1	G	A	0.923283	-53.9253	18.0062	0.002746
12	118174237	rs1995553	intronic	KSR2	G	A	0.514698	-31.7044	10.5873	0.002748
22	24833164	rs11704811	ncRNA_intronic	ADORA2A-AS1,SPECC1L-ADORA	C	T	0.849394	-45.4519	15.1798	0.002751
6	167015686	rs77889715	intronic	RPS6KA2	G	C	0.0572322	-67.7075	22.6126	0.002751
14	21454543	---	intergenic	RNASE2,METTL17	T	C	0.0993324	-51.3069	17.1363	0.002753
3	122342697	rs6788885	intronic	PARP15	A	G	0.120216	-49.6232	16.576	0.002756
11	96535365	rs3019708	intergenic	JRKL-AS1,MIR7976	T	C	0.420735	-31.8545	10.641	0.002757
9	117482066	rs7861372	intergenic	LOC100505478,TNFSF15	C	T	0.0849359	-58.2454	19.4592	0.002761
9	77590349	rs80315529	ncRNA_intronic	LOC101927380	C	T	0.502548	-31.0589	10.3774	0.002763
1	229042787	rs10916378	intergenic	RHOU,RAB4A	T	C	0.921975	-67.8518	22.6707	0.002763
7	134019353	rs34574525	intergenic	SLC35B4,AKR1B1	A	G	0.758492	-37.2193	12.437	0.002766
15	82180967	rs77136110	intergenic	LOC101929655,MEX3B	C	T	0.131277	-48.2822	16.1362	0.00277
17	78951177	rs11653897	intergenic	RPTOR,CHMP6	T	C	0.28896	-35.6693	11.9216	0.002772
22	49967868	rs9616683	intergenic	NONE,C22orf34	C	T	0.436463	-31.5757	10.554	0.002773
7	85004375	rs1916667	intergenic	SEMA3D,GRM3	A	G	0.249933	-37.4278	12.512	0.002778
19	6555363	rs10853994	intergenic	TNFSF9,CD70	A	G	0.633084	-32.3161	10.8039	0.002779
6	40774638	rs10947915	intergenic	LRFN2,LOC101929555	G	A	0.897676	-48.9002	16.3489	0.00278
7	29549626	rs1006250	intronic	CHN2	T	C	0.492378	-30.3404	10.1448	0.002783
3	178308440	rs147820555	intronic	KCNMB2	A	G	0.204114	-39.3329	13.1536	0.002787
21	16920653	---	intergenic	NRIP1,USP25	A	G	0.0655716	-64.1517	21.4539	0.002788
17	14919543	rs58669774	intergenic	HS3ST3B1,CDRT7	A	G	0.251337	-33.7139	11.2772	0.002794
4	139809658	rs28468615	intergenic	LINC00499,CCRN4L	C	T	0.252138	-36.347	12.16	0.002798
7	114585047	rs59273804	intronic	MDFIC	T	C	0.472601	-31.3861	10.5002	0.002798
3	145731629	rs6798509	intergenic	C3orf58,PLOD2	G	A	0.155131	-46.2717	15.4814	0.0028
12	93384925	rs147770406	intergenic	EEA1,LOC643339	T	C	0.12016	-46.8905	15.6891	0.002801
12	131513072	rs7306353	intronic	GPR133	T	C	0.222816	-36.4139	12.184	0.002802
10	78492836	rs846587	intergenic	C10orf11,KCNMA1	T	C	0.196954	-39.9137	13.3555	0.002803
9	101318075	rs884886	intronic	GABBR2	T	G	0.426545	-32.0856	10.7363	0.002803
10	25996101	rs10764581	ncRNA_intronic	LINC00836	T	C	0.90241	-46.2522	15.4763	0.002803
21	21311875	rs3031166	intergenic	LOC101927797,LINC00320	-	TTT	0.464334	-29.8183	9.97768	0.002804
1	195315514	rs10465601	intergenic	NONE,KCNT2	C	T	0.516822	-30.0342	10.0529	0.002812
12	132688842	rs3935476	intronic	GALNT9	C	T	0.797781	-36.8513	12.3378	0.002819
7	88080423	rs17164284	intergenic	STEAP4,ZNF804B	C	G	0.212814	-37.1294	12.4317	0.00282
22	27409295	rs116860326	intergenic	LINC01422,MN1	A	G	0.0744993	-51.728	17.3212	0.002823
6	64249883	rs1923521	intergenic	LGSN,PTP4A1	A	G	0.794447	-40.6631	13.6162	0.002823
3	2653226	rs79741282	intronic	CNTN4	C	T	0.135709	-46.7662	15.6601	0.002824
13	59786384	rs9317054	intergenic	LOC101926897,DIAPH3	T	C	0.818376	-39.552	13.2463	0.002828
7	31298243	rs1005653	intergenic	ADCYAP1R1,NEUROD6	G	A	0.477674	-30.3088	10.1509	0.002828
5	25446514	rs10942114	intergenic	LOC340107,CDH9	T	C	0.458322	-29.3628	9.83513	0.002831
10	29238423	rs12784730	intergenic	C10orf126,LYZL1	A	G	0.852111	-41.146	13.783	0.002833
9	16290290	rs7033995	intergenic	C9orf92,BNC2	A	G	0.539984	-30.8872	10.3463	0.002833
17	78266759	rs11869363	intronic	RNF213	A	G	0.648609	-31.5482	10.5683	0.002834
5	52338664	rs3926397	intronic	ITGA2	G	T	0.462631	-29.4292	9.85867	0.002835
11	117315692	rs11216394	intronic	DSCAML1	A	G	0.383218	-31.7415	10.6337	0.002836
X	92468672	rs5940044	intergenic	PCDH11X,NAP1L3	C	T	0.14897	-34.7901	11.6552	0.002836
16	73999731	rs144029241	intergenic	LOC100506172,LOC101928035	G	C	0.873846	-47.6128	15.9519	0.002838
3	94093804	rs12493918	intergenic	NSUN3,LINC00879	C	T	0.327212	-33.8277	11.3337	0.002838
2	58394543	rs848286	intronic	FANCL	T	C	0.696791	-34.2209	11.4654	0.002838
3	178290081	rs11918114	intronic	KCNMB2	T	C	0.342312	-32.3586	10.8423	0.002841
6	91440898	---	intergenic	MAP3K7,MIR4643	C	T	0.944133	-73.8195	24.7356	0.002842
13	93249693	rs140369226	intronic	GPC5	C	T	0.0785179	-54.6809	18.3232	0.002843
15	90853337	rs8040549	intergenic	NGRN,GABARAPL3	G	A	0.450348	-31.1707	10.4457	0.002844
11	117101574	rs522645	intronic	PCSK7	C	A	0.869594	-50.6052	16.9598	0.002847
2	72034455	rs4852271	intergenic	DYSF,CYP26B1	C	G	0.517532	-30.8843	10.3506	0.002847
3	105759149	rs1159290	intergenic	CBLB,LINC00882	C	T	0.733271	-35.3377	11.8441	0.002849
4	99424491	rs10015273	intronic	TSPAN5	G	C	0.328785	-34.2116	11.4684	0.002853
16	76041094	rs34816330	intergenic	TERF2IP,CNTNAP4	C	-	0.589123	-32.7065	10.9646	0.002855
8	135022644	rs67875853	intergenic	ST3GAL1,ZFAT	-	A	0.0804859	-57.5009	19.2772	0.002856
8	135022545	rs11990122	intergenic	ST3GAL1,ZFAT	G	A	0.0806839	-57.501	19.2772	0.002856
7	52658632	rs73696255	intergenic	COBL,POM121L12	G	A	0.852902	-44.6964	14.985	0.002857
14	33955825	rs1570211	intronic	NPAS3	T	C	0.140813	-40.542	13.5926	0.002858
2	240875852	rs13019067	intergenic	LOC150935,MIR4786	A	G	0.243912	-37.2689	12.4954	0.002858
6	40468990	rs2504832	intronic	LRFN2	A	T	0.904229	-50.4064	16.902	0.002861
12	14546472	rs3083696	intronic	ATF7IP	AA	-	0.531393	-31.0811	10.4233	0.002865
17	53773714	rs4793799	intergenic	MMD,TMEM100	T	C	0.114748	-49.9788	16.7613	0.002866
21	18096399	---	intergenic	LINC00478,C21orf37	T	C	0.515099	-30.1717	10.1187	0.002866
3	45969992	rs12638598	intronic	FYCO1	G	A	0.635113	-32.4873	10.8954	0.002866
8	142539132	rs57768039	intergenic	MROH5,MIR4472-1	G	A	0.425762	-31.6805	10.6253	0.002867
2	53254100	rs11125468	intergenic	NRXN1,ASB3	C	T	0.75555	-33.2583	11.1544	0.002867
5	133415769	rs244668	intergenic	VDAC1,TCF7	G	A	0.65466	-33.905	11.3725	0.00287
10	61793424	rs10821659	intronic	ANK3	G	A	0.0921228	-53.723	18.02	0.00287
2	206572534	rs3771047	intronic	NRP2	C	G	0.919786	-51.7007	17.3437	0.002874
9	82430749	rs1411162	intergenic	TLE4,LOC101927477	T	C	0.886279	-48.3098	16.2071	0.002875
6	53349999	rs10484785	intergenic	ELOVL5,GCLC	G	A	0.881857	-48.2875	16.1998	0.002876
5	65094008	rs62370062	intronic	NLN	T	C	0.482186	-31.0394	10.4151	0.00288
7	16540815	rs59736468	intergenic	SOSTDC1,LRRC72	G	T	0.596865	-30.6304	10.2783	0.002882
8	39792365	rs67170328	upstream	IDO2	-	T	0.0971444	-49.8148	16.7175	0.002884
5	156766466	rs10551072	intronic	CYFIP2	TCT	-	0.846914	-42.8725	14.3878	0.002884
5	156758480	rs10085139	intronic	CYFIP2	C	T	0.847449	-42.8725	14.3878	0.002884
8	39791658	rs11992749	upstream	IDO2	C	A	0.0972222	-49.8149	16.7175	0.002884
13	104949470	---	intergenic	MIR548AS,DAOA-AS1	-	TATTA	0.171081	-39.4933	13.2534	0.002884
22	45497905	rs7284581	intergenic	PHF21B,NUP50-AS1	C	T	0.109805	-51.4115	17.2534	0.002884
6	87508314	rs73493754	intergenic	SNHG5,HTR1E	A	G	0.906492	-57.6716	19.356	0.002887
2	160739910	rs3842564	intronic	LY75,LY75-CD302	-	G	0.399545	-31.4261	10.5472	0.002887
11	117467560	rs4938415	intronic	DSCAML1	A	C	0.208033	-38.0416	12.769	0.00289
X	111955906	rs138975582	intergenic	LHFPL1,AMOT	C	A	0.889987	-40.115	13.4648	0.00289
X	111948117	rs141429876	intergenic	LHFPL1,AMOT	T	C	0.889706	-40.115	13.4648	0.00289
5	20036457	rs1865717	intronic	CDH18	C	T	0.900268	-52.7005	17.6908	0.002892
2	228811038	---	intergenic	DAW1,SPHKAP	-	TT	0.725583	-33.6321	11.2907	0.002894
20	59606573	rs6101199	intergenic	MIR4533,LOC100506470	C	T	0.550696	-31.5354	10.5872	0.002895
1	88225813	rs305418	intergenic	LINC01364,PKN2-AS1	G	T	0.339219	-32.7629	11.0005	0.002898
8	69111244	rs7831659	intronic	PREX2	G	A	0.39088	-31.2607	10.4967	0.0029
19	7559586	rs7260586	intergenic	PEX11G,C19orf45	C	T	0.497053	-29.9507	10.0568	0.0029
4	86720955	rs12504839	intronic	ARHGAP24	G	A	0.729614	-36.8818	12.3849	0.002902
5	38417930	rs72742509	intronic	EGFLAM	T	C	0.777552	-36.5287	12.2674	0.002904
5	65534403	rs29460	intergenic	SREK1,LOC101928769	C	T	0.354701	-32.8511	11.0333	0.002907
10	125756643	rs4929807	intergenic	CPXM2,CHST15	A	G	0.635768	-32.3567	10.8675	0.002907
3	194225655	rs9824773	intergenic	LINC00884,TMEM44-AS1	G	A	0.370291	-31.7403	10.6603	0.002907
15	78609853	rs4887033	intergenic	WDR61,CRABP1	G	T	0.635915	-32.3885	10.8801	0.002912
10	78629013	rs2894346	downstream	KCNMA1	A	G	0.287604	-34.2321	11.4997	0.002913
5	19918383	rs4288117	intronic	CDH18	A	G	0.900027	-52.4666	17.6264	0.002915
1	120406941	---	intergenic	NBPF7,ADAM30	A	G	0.0503077	-67.3388	22.6249	0.002917
1	4029766	rs78497699	intergenic	LINC01346,LOC284661	A	G	0.285199	-33.1885	11.1515	0.002919
3	170958358	rs9844004	intronic	TNIK	C	G	0.0687717	-60.7888	20.4276	0.002922
9	84194472	rs35931914	intergenic	LOC101927477,TLE1	C	-	0.731838	-35.2348	11.8405	0.002922
5	163511391	rs13154652	intergenic	MAT2B,LOC101927835	G	A	0.100962	-54.0354	18.1622	0.002928
10	131638751	rs188762999	intronic	EBF3	T	C	0.160652	-39.2427	13.1911	0.002931
21	36193225	---	intronic	RUNX1	T	C	0.0703773	-57.1964	19.2277	0.002933
8	15178106	rs12678297	intergenic	SGCZ,TUSC3	G	A	0.204259	-38.8115	13.0476	0.002934
18	14961433	rs35930602	ncRNA_intronic	LINC01443	-	A	0.381374	-31.5528	10.6076	0.002934
10	10937512	rs4454607	intergenic	SFTA1P,LINC00710	C	T	0.1931	-39.4165	13.2523	0.002936
5	56409037	rs4700088	intergenic	MIER3,GPBP1	G	A	0.915399	-57.5558	19.3507	0.002936
10	10923713	rs36007130	intergenic	SFTA1P,LINC00710	-	T	0.188919	-39.4165	13.2523	0.002936
5	10680487	rs1049344	UTR3	DAP	G	A	0.816653	-39.2176	13.1859	0.002937
17	14420649	rs2323288	intergenic	HS3ST3B1,CDRT7	C	T	0.563284	-30.5823	10.2824	0.002937
3	94446564	rs34045482	intergenic	NSUN3,LINC00879	G	-	0.350267	-31.947	10.7423	0.00294
3	94436973	rs2029006	intergenic	NSUN3,LINC00879	A	G	0.349626	-31.947	10.7423	0.00294
3	62333551	rs804488	intergenic	C3orf14,FEZF2	C	G	0.847204	-45.0589	15.1524	0.002942
2	31410653	rs7422120	exonic	CAPN14	T	C	0.577983	-30.0236	10.0974	0.002945
2	31397005	rs961641	UTR3	CAPN14	T	C	0.577478	-30.0236	10.0974	0.002945
17	54956321	rs116861175	intergenic	DGKE,MTVR2	C	T	0.896064	-46.799	15.7398	0.002946
17	80928674	rs35355170	intronic	B3GNTL1	C	G	0.496125	-31.7835	10.6899	0.002947
6	47302568	rs3030468	intergenic	TNFRSF21,CD2AP	AC	-	0.706199	-33.2313	11.179	0.002952
12	116143663	rs11067735	intergenic	TBX3,MED13L	C	T	0.584225	-30.5211	10.267	0.002952
12	100662024	rs386528767	intronic	SCYL2	G	A	0.209812	-39.1709	13.1767	0.002952
14	25537235	rs10546583	intergenic	STXBP6,NOVA1	-	CTTT	0.206063	-38.5771	12.9776	0.002953
20	23740511	rs67418849	intergenic	CST1,CST2	G	A	0.795807	-37.9916	12.7805	0.002953
17	10961469	rs77415207	intergenic	PIRT,SHISA6	C	T	0.140587	-44.7868	15.0664	0.002953
1	240778057	rs2153288	intergenic	GREM2,RGS7	T	G	0.696901	-34.7613	11.6953	0.002956
2	15731859	rs10153729	UTR5	DDX1	A	C	0.310198	-32.8871	11.0647	0.002956
1	18861990	---	intergenic	KLHDC7A,PAX7	G	A	0.430099	-31.8056	10.7014	0.002958
11	92755281	rs148725886	intergenic	MTNR1B,SLC36A4	T	C	0.553237	-30.9278	10.4073	0.002961
6	145396776	rs501684	intergenic	UTRN,EPM2A	G	T	0.448756	-32.2017	10.8374	0.002965
2	20606124	rs343139	intergenic	PUM2,RHOB	A	G	0.45755	-31.2359	10.5123	0.002965
7	155075585	rs57331773	intergenic	HTR5A,INSIG1	C	G	0.61074	-31.8828	10.7303	0.002966
5	153135857	---	intronic	GRIA1	C	A	0.927559	-64.6099	21.7458	0.002967
6	40503394	rs9471365	intronic	LRFN2	T	C	0.763566	-35.5542	11.9665	0.002967
14	22956710	rs227869	intergenic	OR4E2,DAD1	A	G	0.0961795	-47.597	16.0209	0.002969
3	20940709	rs141722825	intergenic	LOC101927829,VENTXP7	C	T	0.763362	-35.2831	11.8771	0.002972
12	49416047	rs34546217	intronic	KMT2D	C	-	0.81749	-42.2205	14.2138	0.002974
5	133391516	rs247472	intergenic	VDAC1,TCF7	A	G	0.640107	-32.6712	10.999	0.002974
14	33372759	rs35289879	intergenic	AKAP6,NPAS3	T	C	0.481263	-31.1761	10.496	0.002975
1	10495680	rs76745872	intronic	APITD1,APITD1-CORT	T	C	0.188702	-37.3332	12.5697	0.002977
2	56403955	rs76285729	intergenic	MIR216B,CCDC85A	A	G	0.395364	-31.143	10.4857	0.002977
9	16577695	rs10962496	intronic	BNC2	G	A	0.832753	-41.7103	14.045	0.00298
18	35346766	rs1427040	intergenic	MIR4318,LINC00669	C	T	0.165819	-41.8041	14.0766	0.00298
19	55019613	rs2277971	intronic	LAIR2	G	A	0.482625	-29.8262	10.0431	0.00298
5	155913895	rs4705018	intronic	SGCD	A	C	0.590495	-33.1091	11.1498	0.002983
1	183554449	rs699240	intronic	NCF2	C	T	0.504677	-30.503	10.272	0.002983
7	57281321	---	intergenic	GUSBP10,MIR3147	-	A	0.913572	-64.8274	21.8315	0.002983
16	17233923	rs68064908	intronic	XYLT1	T	C	0.548249	-31.3357	10.5531	0.002985
16	14240517	---	intronic	MKL2	T	C	0.0839377	-55.3533	18.6419	0.002985
8	41558269	rs28537406	intronic	ANK1	G	T	0.111081	-46.0213	15.4998	0.002986
4	28979494	rs117331329	intergenic	MIR4275,PCDH7	G	A	0.939471	-59.8491	20.1579	0.002988
22	45521142	rs5766453	intergenic	PHF21B,NUP50-AS1	A	G	0.546754	-30.3101	10.2098	0.00299
6	57555010	rs2894976	intergenic	PRIM2,GUSBP4	G	T	0.178361	-40.8597	13.7648	0.002993
7	101972595	rs2529104	intergenic	SH2B2,SPDYE6	C	A	0.286916	-35.2296	11.869	0.002995
6	57312410	rs2894863	intronic	PRIM2	C	T	0.17445	-40.9029	13.78	0.002995
4	178897514	rs13150809	ncRNA_intronic	LINC01098	T	G	0.555808	-30.1066	10.1431	0.002996
13	110340104	---	intergenic	MYO16,LINC00676	A	G	0.467638	-31.1999	10.5131	0.003
22	23717465	rs8142127	ncRNA_intronic	CES5AP1	C	T	0.124529	-41.271	13.9072	0.003001
22	43620619	rs916256	intronic	SCUBE1	A	G	0.426317	-29.6926	10.0062	0.003003
X	77781955	rs111951461	intergenic	CYSLTR1,ZCCHC5	C	T	0.595474	-24.0883	8.11755	0.003003
19	49545457	rs184320065	intergenic	SNAR-G1,CGB5	T	C	0.904736	-56.383	19.0015	0.003004
1	190096825	rs10800905	intronic	BRINP3	A	G	0.0942261	-55.6012	18.7391	0.003006
14	21571119	rs12432043	intronic	TMEM253,ZNF219	G	A	0.552304	-30.1191	10.1519	0.003009
17	62950582	rs137917177	intergenic	LRRC37A3,AMZ2P1	C	T	0.429817	-31.9945	10.7858	0.003013
X	99475847	rs59232151	intergenic	XRCC6P5,PCDH19	C	T	0.586695	-23.9465	8.07273	0.003014
X	13566261	rs58835238	intergenic	LINC01203,EGFL6	G	A	0.890224	-38.7209	13.0534	0.003014
16	16009742	rs56043345	intergenic	FOPNL,ABCC1	A	G	0.655689	-31.6924	10.684	0.003014
3	38396651	---	intronic	XYLB	G	A	0.0769025	-63.6232	21.4496	0.003015
3	190223475	rs9290934	intergenic	TMEM207,IL1RAP	A	G	0.21255	-36.7161	12.3785	0.003016
7	44572120	rs76843183	intronic	NPC1L1	T	C	0.0591692	-65.9935	22.2499	0.003017
13	92063813	rs17643246	intronic	GPC5	C	A	0.646374	-31.3076	10.5559	0.003018
9	22202151	rs2025796	intergenic	CDKN2B-AS1,DMRTA1	A	G	0.462671	-29.725	10.0227	0.003019
8	137890457	rs28772926	intergenic	KHDRBS3,FAM135B	T	C	0.862009	-46.6653	15.7345	0.003019
8	137915548	rs71671062	intergenic	KHDRBS3,FAM135B	AGAC	-	0.862425	-46.6653	15.7345	0.003019
8	39195489	rs7000147	ncRNA_intronic	ADAM5	G	A	0.516992	-29.6258	9.99022	0.003022
7	32194339	rs72609239	intronic	PDE1C	T	C	0.191774	-39.4976	13.3198	0.003024
3	134029172	rs13080059	intergenic	RYK,AMOTL2	T	C	0.372346	-33.3079	11.2328	0.003024
9	34561808	rs10814123	intronic	CNTFR	T	C	0.318584	-32.8447	11.0784	0.003029
12	50177324	rs11836282	intergenic	TMBIM6,NCKAP5L	A	T	0.917381	-51.6497	17.4237	0.003033
6	43715994	rs945131	intergenic	MRPS18A,VEGFA	A	G	0.894793	-46.7728	15.7801	0.003036
11	33932605	rs188680533	intergenic	LMO2,CAPRIN1	C	T	0.0728415	-57.6261	19.4418	0.003036
22	24726492	rs199743857	ncRNA_intronic	SPECC1L-ADORA2A	T	-	0.863818	-46.4531	15.673	0.003038
3	176830302	rs1201296	intronic	TBL1XR1	G	A	0.456063	-32.4915	10.9682	0.003053
6	30921364	rs12190030	UTR3	DPCR1	T	C	0.57588	-30.9676	10.4545	0.003055
20	11975284	rs140649912	intergenic	BTBD3,LOC101929486	-	TGTAAA	0.133983	-45.825	15.4709	0.003056
8	144613917	rs1077272	intronic	ZC3H3	A	G	0.122193	-47.436	16.0147	0.003056
3	62299564	rs139663382	ncRNA_intronic	PTPRG-AS1	T	C	0.184478	-39.9966	13.5034	0.003057
19	47042336	rs2033502	intronic	PPP5D1	G	A	0.237617	-35.932	12.1314	0.003057
8	36985891	rs6981456	intergenic	KCNU1,LOC100507420	C	T	0.429376	-29.8216	10.0692	0.00306
17	46548667	rs1912155	intergenic	LOC101927166,HOXB1	G	A	0.40342	-29.9049	10.0984	0.003063
8	38766074	rs10110562	intronic	PLEKHA2	A	G	0.895694	-54.9071	18.5426	0.003065
9	75725254	rs72737024	intergenic	ALDH1A1,ANXA1	G	T	0.903398	-51.2153	17.2973	0.003067
4	65650838	rs202000454	intergenic	TECRL,LOC401134	AT	-	0.785185	-37.5664	12.6892	0.003072
14	21667757	rs7156447	downstream	LINC00641	C	T	0.0551697	-68.0968	23.0033	0.003073
9	38563171	rs2993129	intergenic	FAM95C,ANKRD18A	C	T	0.41593	-31.1505	10.5241	0.003077
22	49840983	rs732641	intergenic	LINC01310,NONE	G	A	0.87657	-43.4027	14.6652	0.003081
2	69198766	rs7422789	intergenic	GKN2,GKN1	C	T	0.218145	-35.5941	12.0281	0.003084
12	131490720	rs4759825	intronic	GPR133	T	C	0.217873	-38.7311	13.0897	0.003087
5	115932465	rs12516436	intergenic	SEMA6A,LOC102467223	A	T	0.157499	-40.3148	13.6284	0.003095
14	23590279	rs3759608	intergenic	CEBPE,SLC7A8	G	A	0.914194	-54.1375	18.302	0.003096
18	14970118	rs786020	ncRNA_exonic	LINC01444	A	G	0.359012	-31.5697	10.673	0.003097
5	60763551	rs80007114	intronic	ZSWIM6	G	C	0.476076	-30.3041	10.2452	0.003097
2	16904254	rs6716519	intergenic	FAM49A,RAD51AP2	A	G	0.232835	-35.2738	11.926	0.003099
11	67416899	rs143775705	intronic	ACY3	G	C	0.139134	-46.5699	15.7463	0.003101
13	47268064	---	intronic	LRCH1	TTCC	-	0.561061	-31.2349	10.5611	0.003101
5	52378851	rs76748680	intronic	ITGA2	-	T	0.521274	-29.1663	9.86193	0.003102
1	181993720	rs147469083	intergenic	CACNA1E,ZNF648	C	T	0.756016	-34.9426	11.8165	0.003106
1	219653486	rs2168337	intergenic	LYPLAL1,RNU5F-1	A	G	0.445174	-32.3209	10.9314	0.003109
1	229556052	rs78401329	intergenic	CCSAP,ACTA1	T	C	0.0670406	-53.418	18.0672	0.00311
15	24032467	rs12900219	intergenic	NDN,PWRN2	C	T	0.640048	-30.8949	10.4511	0.003115
11	8710244	rs10769941	UTR3	RPL27A	T	G	0.33079	-31.5735	10.6814	0.003117
14	58451841	rs2783237	intergenic	SLC35F4,C14orf37	T	C	0.227809	-36.1643	12.2356	0.00312
2	58505679	rs17398913	intergenic	FANCL,LINC01122	C	T	0.83137	-40.2402	13.6161	0.003123
17	63095204	rs12601011	intergenic	GNA13,LOC100507002	G	T	0.453719	-31.5714	10.6839	0.003126
3	126083378	rs9846116	intergenic	KLF15,CCDC37-AS1	C	T	0.877837	-45.9166	15.5392	0.003128
2	33980104	rs71409653	intergenic	MYADML,NONE	TCTC	-	0.817853	-40.1146	13.5762	0.003129
10	36290488	---	intergenic	LINC01452,ANKRD30A	A	G	0.802008	-38.8262	13.1405	0.00313
11	22208054	rs11026454	intergenic	NELL1,ANO5	A	G	0.457632	-30.0292	10.1643	0.003133
15	53777918	rs12148070	intergenic	ONECUT1,WDR72	C	T	0.0608777	-61.77	20.9092	0.003135
15	52483565	rs11070883	ncRNA_UTR5	GNB5	A	G	0.903338	-56.8979	19.2622	0.003138
19	48635702	rs3786763	intronic	LIG1	A	G	0.223751	-39.1538	13.2559	0.00314
X	99481978	rs17323010	intergenic	XRCC6P5,PCDH19	C	T	0.650107	-24.4514	8.27848	0.003141
1	229642740	rs6661924	intronic	NUP133	T	G	0.0884564	-49.9765	16.9263	0.003151
5	147180200	rs1560678	intergenic	JAKMIP2,SPINK1	A	T	0.947426	-58.3231	19.7532	0.003151
1	229623338	rs1065674	exonic	NUP133	C	T	0.0902759	-49.9765	16.9263	0.003151
1	178019759	rs78315017	intergenic	LOC730102,RASAL2-AS1	G	T	0.240914	-36.5025	12.3632	0.003152
6	161432467	rs35409033	intronic	MAP3K4	G	A	0.856775	-40.047	13.5637	0.003152
9	34565781	rs10738931	intronic	CNTFR	A	G	0.362046	-31.6381	10.7168	0.003155
2	50744820	rs6707531	intronic	NRXN1	A	G	0.624732	-32.3143	10.9458	0.003155
17	12312385	rs9909973	intergenic	MAP2K4,LINC00670	A	G	0.0988248	-53.8636	18.2459	0.003156
6	45811129	rs9369583	intergenic	RUNX2,CLIC5	G	A	0.247527	-34.5699	11.7112	0.003158
4	178254187	rs59505172	intronic	NEIL3	A	-	0.634817	-32.3885	10.9744	0.003165
18	73789264	rs2271152	intergenic	SMIM21,LOC339298	G	C	0.806158	-38.6968	13.1133	0.003168
9	71944267	rs118058771	UTR5	FAM189A2	G	A	0.197354	-40.1708	13.6137	0.00317
14	25930988	rs8015400	intergenic	STXBP6,NOVA1	C	A	0.36985	-32.1597	10.9003	0.003174
X	32889584	rs932579	intronic	DMD	C	T	0.585649	-24.3933	8.26958	0.00318
6	14621353	rs11759651	intergenic	LINC01108,JARID2	C	T	0.793785	-39.1187	13.2616	0.00318
7	7906724	rs6463739	ncRNA_intronic	RPA3OS	G	C	0.487684	-30.3444	10.2875	0.003181
2	50538254	rs1520522	intronic	NRXN1	T	C	0.141845	-48.1792	16.3351	0.003184
7	31449948	rs77903906	intergenic	NEUROD6,CCDC129	A	C	0.30592	-32.975	11.1803	0.003184
6	13370691	rs182789086	intronic	GFOD1	A	G	0.122578	-47.1872	15.9993	0.003185
16	66476944	rs7198295	intronic	BEAN1	T	C	0.195216	-38.6713	13.114	0.00319
15	81835886	rs12439684	intergenic	LOC101929655,MEX3B	A	C	0.806038	-35.3586	11.9913	0.003191
1	66776843	rs72926316	intronic	PDE4B	T	C	0.136315	-43.8512	14.8729	0.003194
9	96591546	rs10992913	intergenic	MIR4291,BARX1	T	C	0.527941	-30.7257	10.4211	0.003194
2	230912734	rs188740143	intronic	SLC16A14	A	G	0.111692	-51.9186	17.6101	0.003196
2	230911044	rs140272119	exonic	SLC16A14	T	C	0.114614	-51.9186	17.6101	0.003196
4	183548965	rs4069813	intronic	TENM3	T	C	0.143239	-39.885	13.5296	0.003198
1	88236589	rs305404	intergenic	LINC01364,PKN2-AS1	C	A	0.925134	-55.6106	18.8637	0.003198
6	80175399	rs2629471	intergenic	HMGN3-AS1,LCA5	G	A	0.896579	-51.7256	17.546	0.003198
4	183550589	rs7693901	intronic	TENM3	T	C	0.143144	-39.885	13.5296	0.003198
10	121357265	rs28652753	upstream	TIAL1	G	A	0.0515395	-64.8382	21.9968	0.003202
4	182076503	rs72692427	ncRNA_intronic	LINC00290	G	A	0.144709	-45.3574	15.3887	0.003204
11	97056607	rs6590975	intergenic	JRKL-AS1,MIR7976	A	G	0.730718	-32.9725	11.1876	0.003206
14	33930439	rs10872877	intronic	NPAS3	T	C	0.280941	-33.1965	11.2655	0.003211
9	141011771	rs2606358	intronic	CACNA1B	A	G	0.309594	-33.8658	11.4926	0.003211
22	25082635	rs5760578	intergenic	POM121L10P,PIWIL3	T	C	0.617309	-30.9198	10.4946	0.003216
12	116133458	rs11284340	intergenic	TBX3,MED13L	A	-	0.924993	-57.258	19.4353	0.003218
2	31240837	rs4952025	intronic	GALNT14	T	C	0.18433	-38.0166	12.9044	0.003219
1	150595537	rs11204682	intronic	ENSA	T	G	0.143448	-45.7865	15.5442	0.003223
13	71994545	rs11843100	intergenic	LINC00348,DACH1	A	G	0.81707	-36.7683	12.4828	0.003224
10	25289734	rs16925223	intronic	ENKUR	T	C	0.806283	-36.7023	12.4613	0.003226
13	103560473	rs9554905	intergenic	METTL21EP,SLC10A2	G	T	0.22341	-36.429	12.3704	0.003231
5	157586253	rs1389824	intergenic	CLINT1,LOC101927697	T	G	0.803696	-39.1581	13.2976	0.003232
4	7519167	rs73214605	intronic	SORCS2	G	A	0.242323	-35.2221	11.9615	0.003233
8	103513472	rs75756734	intergenic	UBR5,ODF1	T	C	0.868379	-44.2205	15.0172	0.003233
1	229571235	---	intergenic	ACTA1,NUP133	-	CTCTCTCTCTCTCTCTCTCTCTCTCC	0.0831994	-50.599	17.1839	0.003234
10	24817110	rs79576236	intronic	KIAA1217	T	C	0.194229	-38.2555	12.9927	0.003236
14	72595888	rs7142272	intronic	RGS6	C	T	0.7289	-34.3058	11.6514	0.003236
3	193552426	---	intergenic	OPA1,LOC647323	G	C	0.0538051	-72.4128	24.5954	0.003238
3	193569171	---	intergenic	OPA1,LOC647323	A	C	0.0558376	-72.4128	24.5954	0.003238
8	2643836	rs2124155	intergenic	MYOM2,CSMD1	G	T	0.188553	-38.0247	12.9156	0.003239
13	98006417	rs56784388	intronic	MBNL2	T	-	0.530991	-29.318	9.95852	0.00324
13	84558654	rs7996569	intergenic	SLITRK1,LINC00333	C	T	0.180604	-37.0638	12.5928	0.003248
20	21040394	rs11468225	intergenic	RALGAPA2,KIZ	CTAA	-	0.651535	-33.2594	11.3009	0.00325
22	47527040	rs73479318	intronic	TBC1D22A	T	C	0.127972	-42.7581	14.5286	0.00325
9	88016931	rs10124778	intergenic	NTRK2,AGTPBP1	C	T	0.93369	-60.2319	20.4663	0.003251
22	49542100	---	intergenic	LINC01310,NONE	TCA	-	0.918713	-67.5609	22.9587	0.003253
15	84024706	---	intergenic	BNC1,SH3GL3	TGGAGTCACTGCTTAGTGGTGGTT	-	0.918673	-56.0594	19.0503	0.003253
15	83978285	rs73438985	intergenic	BNC1,SH3GL3	C	T	0.917535	-56.0594	19.0503	0.003253
4	6534627	rs13127385	intronic	PPP2R2C	C	T	0.801042	-39.0172	13.2602	0.003256
12	86163357	rs190656999	intergenic	ALX1,RASSF9	G	T	0.906593	-57.4674	19.5307	0.003257
11	88063944	rs494627	intronic	CTSC	C	T	0.551045	-30.9091	10.5049	0.003257
1	117212594	rs599563	intergenic	IGSF3,MIR320B1	G	A	0.18262	-40.9547	13.9194	0.003258
7	83890320	rs77914456	intergenic	SEMA3A,LOC101927378	T	G	0.649705	-31.4468	10.6882	0.003259
3	62028233	rs12487129	intronic	PTPRG	C	G	0.405915	-31.5914	10.7375	0.003259
15	48137498	rs8030172	ncRNA_intronic	LOC101928442	A	G	0.325174	-31.9651	10.8645	0.003259
19	6530656	rs348337	upstream	TNFSF9	C	T	0.662108	-31.5204	10.7143	0.003262
12	118079630	rs7968987	intronic	KSR2	C	T	0.392503	-32.3086	10.9831	0.003264
22	43609910	rs138991	intronic	SCUBE1	T	C	0.437166	-30.2317	10.2777	0.003266
6	23798716	rs182833630	intergenic	HDGFL1,NRSN1	T	C	0.1037	-49.6969	16.8959	0.003268
17	77423753	rs4790037	intronic	RBFOX3	C	T	0.382922	-31.2042	10.6103	0.003272
2	37753583	rs7593076	intergenic	QPCT,CDC42EP3	T	G	0.164127	-39.9508	13.5846	0.003273
16	64583820	rs9922079	intergenic	NONE,CDH11	A	G	0.205097	-36.274	12.3348	0.003274
12	57226961	rs181735139	intergenic	HSD17B6,SDR9C7	A	G	0.947894	-66.5302	22.6242	0.003275
22	18051188	rs411358	intronic	SLC25A18	T	G	0.295894	-32.1108	10.9217	0.003281
7	16506133	rs10499470	upstream	SOSTDC1	G	A	0.90992	-51.8493	17.6368	0.003284
22	34021876	rs240590	intronic	LARGE	A	G	0.0900107	-50.9243	17.3228	0.003285
15	99789714	---	UTR5	TTC23	C	T	0.0556153	-66.1184	22.4929	0.003287
16	13832151	rs1894395	intergenic	SHISA9,ERCC4	G	A	0.490374	-30.9444	10.5274	0.003288
1	201802062	rs61821755	intronic	IPO9	A	G	0.527265	-32.2538	10.973	0.003289
19	51083595	rs8100750	intergenic	LRRC4B,SNAR-F	C	T	0.0548585	-60.97	20.7423	0.003289
6	57266115	rs76859282	intronic	PRIM2	C	A	0.173977	-40.9814	13.9429	0.00329
3	105700120	rs9868510	intergenic	CBLB,LINC00882	C	A	0.706629	-33.5596	11.4184	0.003292
16	77762569	rs75210101	intronic	NUDT7	G	A	0.111096	-52.9872	18.0306	0.003295
17	65612596	rs2642033	intronic	PITPNC1	G	A	0.47768	-32.1305	10.9351	0.0033
12	4360355	rs10744638	intergenic	PARP11,CCND2	T	C	0.474325	-28.5953	9.73263	0.003302
X	152215841	rs149797686	intergenic	PNMA5,PNMA3	C	T	0.876335	-34.5447	11.76	0.003309
4	183486609	rs17258176	intronic	TENM3	G	A	0.059845	-62.3374	21.2216	0.003309
16	66352826	rs181700030	intergenic	LINC00922,CDH5	A	G	0.888132	-48.8349	16.6251	0.00331
9	136890107	rs7470605	upstream	LINC00094	G	C	0.412651	-30.7249	10.4604	0.003311
12	118081942	rs77114363	intronic	KSR2	T	C	0.35155	-33.0659	11.259	0.003316
17	69173813	rs2886914	ncRNA_intronic	CASC17	C	G	0.780782	-35.1329	11.963	0.003316
2	116415565	rs7577914	intronic	DPP10	T	C	0.0830436	-58.6616	19.976	0.003318
3	190271560	rs2098573	intronic	IL1RAP	G	C	0.212891	-36.9281	12.575	0.003318
12	118191088	rs34994217	intronic	KSR2	T	C	0.692215	-35.4955	12.0892	0.003323
13	98313495	rs9554412	intergenic	RAP2A,IPO5	C	T	0.802885	-37.0575	12.6218	0.003325
14	98794246	rs78736379	intergenic	C14orf64,C14orf177	C	A	0.204758	-37.1536	12.6544	0.003325
10	122956997	rs11199823	intergenic	MIR5694,FGFR2	A	G	0.553801	-32.0343	10.9117	0.003327
2	177679372	rs1513881	intergenic	LOC102724224,HNRNPA3	A	G	0.764171	-34.4854	11.7466	0.003327
2	50443908	rs11897191	intronic	NRXN1	G	A	0.626606	-31.5266	10.7388	0.003327
15	81814643	rs7181823	intergenic	LOC101929655,MEX3B	C	T	0.66359	-33.5484	11.4279	0.003328
2	13951524	rs6432417	intergenic	LOC100506474,LINC00276	G	A	0.427922	-32.8656	11.1961	0.003331
5	133972999	rs147223535	intergenic	SAR1B,SEC24A	G	C	0.0704545	-61.4222	20.9271	0.003335
12	82429162	rs118128476	intergenic	LOC101928449,CCDC59	G	A	0.932613	-63.8851	21.767	0.003336
4	30892626	rs10939316	intronic	PCDH7	G	A	0.208901	-35.4604	12.082	0.003336
15	45950528	rs73422332	intronic	SQRDL	C	T	0.345423	-33.6084	11.4516	0.003337
15	66954426	rs2469110	ncRNA_intronic	LINC01169	A	G	0.167557	-43.0754	14.6775	0.003338
6	101482379	rs13211508	intergenic	ASCC3,GRIK2	A	G	0.17526	-37.9497	12.9317	0.00334
17	10936791	rs79479452	intergenic	PIRT,SHISA6	C	G	0.144519	-42.1456	14.3615	0.00334
6	101509042	rs34719547	intergenic	ASCC3,GRIK2	-	A	0.175434	-37.9497	12.9317	0.00334
22	34142693	rs118097660	ncRNA_intronic	LARGE-AS1	C	T	0.0955371	-48.3645	16.4814	0.003341
2	199382841	rs149985804	intergenic	LOC101927619,SATB2	G	T	0.808525	-38.3894	13.082	0.003341
6	67556311	rs9354481	intergenic	SLC25A51P1,BAI3	G	A	0.702652	-32.4444	11.0565	0.003342
5	75925017	rs72777542	intronic	IQGAP2	G	A	0.144441	-42.5829	14.514	0.003347
13	46358933	rs12856198	intronic	SIAH3	T	C	0.139936	-43.5233	14.836	0.00335
6	57403079	rs76034075	intronic	PRIM2	C	T	0.176793	-40.4724	13.7957	0.00335
12	5000217	rs11063388	intergenic	KCNA6,KCNA1	C	G	0.764249	-34.3775	11.7187	0.003351
1	1201632	rs12402622	intronic	UBE2J2	A	G	0.252478	-34.2631	11.6799	0.003351
8	2274158	rs1615704	intergenic	MYOM2,CSMD1	G	A	0.313169	-32.2336	10.9883	0.003352
6	73161393	rs1855534	intergenic	RIMS1,KCNQ5	C	T	0.544507	-30.2843	10.3239	0.003353
2	212200898	rs7562574	intergenic	CPS1,ERBB4	A	G	0.894308	-46.9633	16.0098	0.003353
15	84919983	rs7162248	intergenic	GOLGA6L4,LOC103171574	T	C	0.0635197	-65.9826	22.4942	0.003354
5	154751305	rs1366583	intergenic	KIF4B,SGCD	C	T	0.508888	-31.3869	10.7006	0.003355
16	12421593	rs3975335	intronic	SNX29	-	AG	0.775535	-34.6531	11.8154	0.003358
4	178287162	rs7667508	intergenic	NEIL3,AGA	C	T	0.309142	-33.7772	11.5177	0.003361
13	54742289	rs182113307	intergenic	LINC00458,MIR1297	C	T	0.0774573	-62.647	21.3621	0.003361
7	16545012	rs886756	intergenic	SOSTDC1,LRRC72	T	C	0.531125	-29.4352	10.0379	0.003363
1	85941419	rs7512147	intronic	DDAH1	A	G	0.182073	-39.246	13.3837	0.003364
16	51309872	rs7189060	intergenic	SALL1,LOC101927364	A	G	0.29131	-31.8591	10.8652	0.003366
8	137862435	rs17597927	intergenic	KHDRBS3,FAM135B	G	T	0.859454	-46.1686	15.7466	0.003368
12	56564811	rs7960225	intronic	SMARCC2	G	A	0.268687	-32.8924	11.2195	0.003371
10	77711337	rs182313898	intronic	C10orf11	G	A	0.818643	-37.4872	12.7872	0.003372
1	10509703	rs1307494	intronic	APITD1-CORT	C	T	0.279337	-32.9934	11.2546	0.003373
21	40149446	---	intergenic	LINC00114,ETS2	A	G	0.0565962	-56.75	19.359	0.003374
3	26936088	rs1868111	intergenic	LRRC3B,NEK10	C	T	0.547912	-31.5091	10.7488	0.003374
13	47692291	rs2802403	intergenic	HTR2A,SUCLA2	G	A	0.347419	-32.0635	10.938	0.003374
1	9420623	rs4908855	intronic	SPSB1	G	A	0.483565	-30.3192	10.3432	0.003375
7	86379278	rs13437644	intronic	GRM3	A	G	0.92746	-61.5349	20.9933	0.003377
10	82464634	rs4934426	intergenic	SH2D4B,NRG3	C	T	0.8471	-44.375	15.1406	0.00338
10	134807532	rs10870221	intergenic	LINC01168,LOC100128127	G	A	0.643793	-31.6021	10.7855	0.003389
22	34021461	rs738961	intronic	LARGE	G	A	0.149653	-41.7902	14.2635	0.003391
11	98890459	rs11218061	intergenic	MIR7976,CNTN5	A	C	0.649306	-32.9056	11.2323	0.003395
6	33903696	rs6457751	intergenic	MIR7159,MIR1275	G	T	0.760741	-37.6444	12.8502	0.003395
18	74731437	rs11455414	intronic	MBP	A	-	0.603927	-30.8816	10.5425	0.003398
3	76418451	rs7649237	intergenic	ZNF717,ROBO2	A	G	0.363296	-31.4302	10.7303	0.003399
17	70251190	rs12451194	intergenic	SOX9,LINC00673	G	C	0.865498	-45.5685	15.5588	0.003403
9	138448056	rs36074829	intergenic	OBP2A,PAEP	G	C	0.209837	-38.1674	13.0321	0.003404
8	103473933	rs76071095	intergenic	UBR5,ODF1	C	T	0.799625	-38.4299	13.1223	0.003405
8	139603851	rs10106999	intronic	COL22A1	G	A	0.518707	-30.0415	10.2588	0.003407
2	136821256	rs184270164	intergenic	LOC101928243,CXCR4	T	A	0.908081	-53.2907	18.198	0.003407
1	191431169	rs10920948	intergenic	LOC440704,RGS18	A	G	0.295667	-32.3296	11.0399	0.003407
4	120470983	---	intronic	PDE5A	G	A	0.0843792	-56.8885	19.4272	0.003408
10	78116099	rs9299535	intronic	C10orf11	G	T	0.838275	-39.8963	13.6248	0.003409
3	189311902	rs11720414	intergenic	TPRG1,TP63	G	A	0.243847	-35.6807	12.1854	0.00341
4	86798190	rs79898317	intronic	ARHGAP24	T	C	0.828213	-42.5532	14.5334	0.003412
20	12973068	rs117043871	intergenic	LOC101929486,SPTLC3	A	T	0.763953	-34.0702	11.636	0.003412
9	104223252	rs10989518	intergenic	ALDOB,LOC101928470	T	C	0.789171	-38.2429	13.0618	0.003413
5	161925732	rs13176858	intergenic	GABRG2,CCNG1	A	G	0.404634	-31.1332	10.6335	0.003413
6	69619007	rs1283951	intronic	BAI3	C	T	0.577482	-30.809	10.5239	0.003417
[truncated: 3,686 more rows]
