# Supplementary material for: A Genome-Wide Association Study Using a Custom Genotyping Array Identifies Variants inGPR158Associated With Reduced Energy Expenditure in American Indians
Source: Oxford University Press journal article supplement (doi:10.2337/db16-1565), 2017-05-05
Supplement: db161565supplementarydata4.xlsx [file db161565supplementarydata4.xlsx]

## Sheet: Sheet1
								24-h EE			RMR			Maximum BMI			Percent body fat
Chromosome	Position	Variant ID	Location	Gene(s)	Risk allele	Non-risk allele	RAF	Beta	SE	P	Beta	SE	P	Beta	SE	P	Beta	SE	P
10	25735858	rs11014566	intronic	GPR158	G	A	0.599141	-33.0115	10.5074	0.00168	-31.103	12.0749	0.0099	0.016705	0.004778	0.000471	0.922459	0.309807	0.002906
21	30662480	---	intergenic	LINC00189,BACH1	-	AAG	0.304011	-30.6093	11.1299	0.005956	-34.5163	13.2922	0.009412	0.014187	0.00491	0.00386	-0.737548	0.329159	0.025045
12	97806525	rs12424131	intergenic	NEDD1,RMST	A	G	0.879776	-42.8387	15.4702	0.005621	-55.8229	19.166	0.003584	0.017925	0.006953	0.009932	0.134925	0.466119	0.772226
12	97810465	rs17026922	intergenic	NEDD1,RMST	G	A	0.921721	-46.8	17.7853	0.008504	-65.6905	22.5926	0.003642	0.019592	0.007812	0.012147	0.484484	0.539842	0.369475
14	21113898	rs56069351	intergenic	OR6S1,ANG	T	C	0.251335	-32.9564	11.7234	0.004936	-42.0856	14.0526	0.002746	0.012321	0.005064	0.014968	0.098817	0.344913	0.774496
6	64622956	rs2253395	intronic	EYS	G	A	0.475923	-27.3156	9.95955	0.006094	-35.6079	11.9931	0.002987	-0.010256	0.004657	0.027651	-0.166084	0.29816	0.577508
20	4157857	rs1538072	intronic	SMOX	G	C	0.766066	-35.8729	12.6579	0.004596	-52.0733	15.0459	0.000538	0.011931	0.005619	0.033734	0.523718	0.363177	0.149289
7	157314054	rs917736	intergenic	LOC101927914,PTPRN2	C	T	0.79585	-37.5874	12.5361	0.002715	-43.0071	15.1009	0.0044	-0.011627	0.005575	0.03701	-0.394538	0.36857	0.284414
3	77645020	rs80275771	intronic	ROBO2	A	T	0.159456	-38.7627	14.8074	0.00885	-45.912	16.9359	0.006709	0.01365	0.006607	0.038829	0.586354	0.424577	0.16727
9	136641235	rs667183	intronic	VAV2	C	T	0.848772	-39.526	15.1161	0.008927	-50.054	18.574	0.007043	0.011528	0.006156	0.061118	0.887264	0.423923	0.036351
2	30977632	rs1983383	intronic	CAPN13	C	A	0.492511	-26.8133	10.3584	0.009638	-35.2605	12.6301	0.005241	0.00851	0.004614	0.06512	0.67972	0.305727	0.026196
17	62851673	---	intronic	LRRC37A3	-	GTAA	0.258931	-41.5032	12.31	0.000748	-42.9586	15.3218	0.005052	0.010052	0.005527	0.068955	0.00231	0.356505	0.994829
5	34497637	rs35065368	intergenic	C1QTNF3-AMACR,RAI14	-	TG	0.44662	-27.0423	10.4134	0.009407	-37.6162	12.8925	0.003527	0.008035	0.004626	0.082382	0.435163	0.312252	0.16343
17	14299161	rs57333665	intergenic	HS3ST3B1,CDRT7	A	G	0.443464	-28.3415	10.3411	0.006132	-33.3104	12.228	0.006447	-0.008304	0.004798	0.083533	-0.398761	0.30966	0.197836
7	11673174	rs3857703	intronic	THSD7A	G	A	0.151872	-39.1444	14.8019	0.00818	-47.3097	17.7974	0.007855	0.011521	0.006677	0.084469	1.34982	0.432388	0.001798
5	82211087	rs13355060	intergenic	LINC01338,TMEM167A	T	C	0.4897	-30.5761	10.8352	0.004774	-35.3606	12.7787	0.005655	-0.00793	0.004598	0.084602	-0.246828	0.310578	0.426766
12	131513072	rs7306353	intronic	GPR133	T	C	0.222816	-36.4139	12.184	0.002802	-47.5082	14.552	0.001096	-0.009044	0.005335	0.090012	0.109204	0.360048	0.761657
12	97792745	rs10777858	intergenic	NEDD1,RMST	T	G	0.796647	-47.0578	12.7422	0.000222	-43.9484	15.5333	0.004665	0.009289	0.005493	0.090839	0.469932	0.386829	0.22443
2	38513222	rs2166852	intergenic	CYP1B1-AS1,ATL2	A	C	0.663546	-29.7256	11.4535	0.00945	-36.693	13.3011	0.005804	0.007993	0.004871	0.100842	0.456966	0.338806	0.177415
5	34497252	rs920479	intergenic	C1QTNF3-AMACR,RAI14	A	G	0.445913	-27.5265	10.4226	0.008265	-37.2643	12.8626	0.003767	0.007536	0.004623	0.103075	0.442221	0.312338	0.156822
10	81003492	---	intronic	ZMIZ1	C	G	0.921846	-54.7799	21.1819	0.009705	-74.7047	24.5565	0.002349	0.015353	0.009647	0.111523	0.082026	0.628038	0.896087
2	238605650	rs12468843	intronic	LRRFIP1	G	A	0.0870959	-43.5861	15.2898	0.004363	-63.0105	18.9317	0.000874	-0.012256	0.007954	0.123317	-0.765868	0.482974	0.112799
11	129151455	rs113345355	intergenic	ARHGAP32,BARX2	T	-	0.707777	-33.5691	11.931	0.004899	-38.2659	14.4746	0.008201	-0.007656	0.005081	0.131859	0.364786	0.349968	0.297254
7	138399483	rs1005082	intronic	ATP6V0A4	C	T	0.412473	-28.8478	10.0923	0.004258	-31.7596	12.1692	0.009058	0.00696	0.004628	0.132581	0.156265	0.307979	0.611882
2	141586492	rs2380896	intronic	LRP1B	A	G	0.126774	-54.5273	16.2467	0.00079	-52.0461	19.1732	0.006637	-0.009668	0.006562	0.140691	0.176698	0.474367	0.709527
5	82209237	rs7341007	intergenic	LINC01338,TMEM167A	T	C	0.546658	-27.3751	10.5061	0.00917	-36.507	12.7322	0.00414	-0.006677	0.004617	0.148126	-0.116946	0.310825	0.706737
17	14758142	rs12951588	intergenic	HS3ST3B1,CDRT7	A	G	0.251269	-35.3931	10.9198	0.00119	-35.6581	13.2426	0.007088	0.007555	0.005235	0.148966	-0.488156	0.326307	0.134653
17	14758826	rs35538661	intergenic	HS3ST3B1,CDRT7	-	C	0.251736	-35.3931	10.9198	0.00119	-35.6581	13.2426	0.007088	0.007522	0.005233	0.150594	-0.488156	0.326307	0.134653
17	17215120	rs11078382	intronic	NT5M	G	A	0.830216	-51.4182	14.2554	0.00031	-49.3228	18.4199	0.007413	-0.009243	0.006567	0.159269	-0.811933	0.425965	0.056637
1	228945313	rs146586031	intergenic	RHOU,RAB4A	A	C	0.493581	-27.9383	10.2894	0.006622	-36.0014	12.6115	0.004309	0.006723	0.004867	0.167183	-0.151598	0.314065	0.629311
6	70442892	---	intronic	LMBRD1	T	G	0.939455	-69.9114	21.714	0.001283	-75.7758	26.8055	0.0047	-0.014229	0.010507	0.175665	-0.069825	0.655524	0.915172
2	238578536	rs6733552	intronic	LRRFIP1	G	A	0.161139	-32.7114	12.3578	0.00812	-43.3527	15.4029	0.004884	-0.00804	0.006192	0.194147	-0.246761	0.395797	0.532987
7	88105760	---	intergenic	STEAP4,ZNF804B	G	A	0.359471	-32.7942	10.6047	0.001985	-34.3236	12.9754	0.008161	0.006227	0.004807	0.195158	0.571386	0.318806	0.073089
10	25737382	rs4747521	intronic	GPR158	C	T	0.72255	-48.2835	10.7115	6.5561e-06	-37.6832	13.2365	0.004414	0.006393	0.005065	0.206901	0.453138	0.329964	0.169661
17	62950582	rs137917177	intergenic	LRRC37A3,AMZ2P1	C	T	0.429817	-31.9945	10.7858	0.003013	-44.4144	12.8963	0.000573	0.005937	0.004818	0.217909	0.208064	0.314081	0.50768
9	136652224	rs75475678	intronic	VAV2	G	A	0.851471	-44.0354	15.8211	0.00538	-50.8478	18.9248	0.007214	0.008436	0.006921	0.222894	0.022934	0.447891	0.959162
4	13024822	rs34096006	intergenic	HS3ST1,RAB28	A	C	0.830391	-48.5246	14.4477	0.000783	-49.9697	17.8181	0.005041	0.007321	0.006017	0.22373	0.399341	0.410723	0.330908
2	206572534	rs3771047	intronic	NRP2	C	G	0.919786	-51.7007	17.3437	0.002874	-56.9596	21.2963	0.007481	0.010516	0.008688	0.226135	0.935815	0.558773	0.09398
8	117785293	rs3842630	UTR3	UTP23	-	TTCTCATTTG	0.220974	-43.2271	12.7358	0.000688	-43.4999	15.3224	0.004526	-0.006408	0.005511	0.244943	-0.551278	0.358778	0.124405
18	61833185	rs34306412	ncRNA_intronic	LOC284294	-	G	0.265377	-32.0812	11.3707	0.004782	-36.9513	13.6378	0.006739	0.005747	0.005035	0.253682	0.008485	0.34076	0.980135
10	30910974	rs2659496	intronic	LYZL2	T	C	0.487887	-26.2864	10.1093	0.009317	-34.3347	12.4991	0.006015	0.005266	0.004708	0.263369	0.326278	0.309708	0.292112
16	66352826	rs181700030	intergenic	LINC00922,CDH5	A	G	0.888132	-48.8349	16.6251	0.00331	-54.4268	20.6383	0.00836	-0.008771	0.007896	0.266618	0.334233	0.509906	0.512159
16	28023376	rs74016604	intronic	GSG1L	C	G	0.837119	-39.8503	14.9486	0.00768	-58.0561	18.0739	0.001317	0.006803	0.006303	0.280448	0.286107	0.427407	0.503239
20	23740511	rs67418849	intergenic	CST1,CST2	G	A	0.795807	-37.9916	12.7805	0.002953	-40.1909	15.1415	0.007946	0.005955	0.00555	0.283237	-0.244751	0.367316	0.505204
2	130507396	rs7586873	intergenic	LOC151121,LOC389033	A	G	0.30494	-31.2831	12.0277	0.009298	-39.0029	14.1379	0.005803	-0.005399	0.005053	0.285243	-0.261143	0.351611	0.45766
10	81047084	rs4980059	intronic	ZMIZ1	C	T	0.792435	-36.0243	12.883	0.00517	-45.6406	15.5058	0.003246	0.00633	0.005996	0.291092	-0.167614	0.384829	0.66316
10	100982614	rs2862530	intronic	HPSE2	T	C	0.506426	-27.8465	9.88141	0.004831	-32.3092	12.1778	0.007976	-0.004854	0.004609	0.29226	-0.069679	0.299902	0.816274
8	117750796	rs11393684	intronic	EIF3H	-	T	0.224853	-44.6126	12.7123	0.000449	-44.5152	15.3176	0.003659	-0.005819	0.005537	0.293286	-0.461498	0.360152	0.200054
12	131503244	rs1195914	intronic	GPR133	A	C	0.236029	-32.5718	12.2782	0.007982	-38.7037	14.5909	0.007988	-0.005618	0.005409	0.298949	-0.378113	0.362168	0.296474
7	8721520	rs977458	intronic	NXPH1	C	G	0.608422	-27.9085	10.8067	0.009808	-41.2083	13.32	0.001977	0.004883	0.004759	0.304876	-0.009293	0.328964	0.977464
8	21457258	rs12678061	intergenic	LOC101929172,GFRA2	C	T	0.734045	-30.6578	11.6224	0.008344	-48.2432	14.4815	0.000864	0.005078	0.005106	0.319981	0.237035	0.336579	0.481278
11	92209853	rs1941438	intronic	FAT3	T	G	0.668272	-32.1165	10.6819	0.002642	-41.6602	13.4067	0.001887	-0.00488	0.004923	0.321567	0.034858	0.329613	0.915777
19	48605227	rs111878616	intronic	PLA2G4C	G	A	0.808957	-35.7614	13.5192	0.008164	-45.6058	16.7481	0.006468	0.006031	0.006101	0.322902	-0.985369	0.408615	0.015888
18	61848999	rs55821306	ncRNA_intronic	LOC284294	G	A	0.266506	-32.0811	11.3707	0.004782	-36.9513	13.6378	0.006739	0.004953	0.005024	0.324237	-0.028771	0.339398	0.932444
8	117659641	rs141621235	intronic	EIF3H	-	TTG	0.208646	-36.9371	13.6222	0.006697	-43.6028	16.4691	0.008107	-0.00571	0.005904	0.333494	-0.467738	0.382253	0.22109
8	21430225	rs2127857	intergenic	LOC101929172,GFRA2	G	A	0.691208	-30.4953	11.2411	0.006671	-36.875	14.1039	0.008935	0.004794	0.00496	0.333788	0.295516	0.327469	0.366831
9	35905761	rs10814295	upstream	HRCT1	T	C	0.781651	-40.6986	12.3005	0.000937	-44.1936	15.1776	0.003594	-0.00537	0.005625	0.339737	-0.731372	0.380831	0.0548
22	29847152	---	intergenic	RFPL1,NEFH	AAG	-	0.916867	-59.823	20.9652	0.004325	-66.7037	25.0985	0.007868	0.008996	0.009518	0.344555	-0.1716	0.60133	0.775363
17	62767325	rs9912402	ncRNA_intronic	LOC146880	C	T	0.465185	-28.6446	10.2761	0.005312	-41.0156	12.3962	0.000937	0.004387	0.004648	0.345259	-0.125142	0.305804	0.682377
8	21446577	rs34509840	intergenic	LOC101929172,GFRA2	C	-	0.7363	-30.6578	11.6224	0.008344	-48.3787	14.5558	0.000888	0.004671	0.005121	0.361637	0.309841	0.337282	0.358284
14	93678750	rs1029795	intronic	UBR7	C	T	0.777284	-33.245	12.1745	0.00632	-47.8772	14.7298	0.001153	0.004751	0.005263	0.3666	0.147777	0.365699	0.686144
1	220457101	rs17565835	intergenic	RAB3GAP2,MARK1	G	A	0.942987	-58.6836	21.4574	0.00624	-81.1749	26.6466	0.002316	0.007986	0.008937	0.371534	-0.610653	0.661207	0.355725
13	71994545	rs11843100	intergenic	LINC00348,DACH1	A	G	0.81707	-36.7683	12.4828	0.003224	-39.6712	15.1408	0.00879	-0.004764	0.005628	0.397348	0.083272	0.382756	0.827773
22	43646677	rs35819202	intronic	SCUBE1	-	G	0.408897	-31.9857	10.1198	0.001574	-33.0009	12.1328	0.006529	-0.003894	0.004769	0.414292	-0.025996	0.314603	0.934144
21	30556420	rs111677300	intergenic	MAP3K7CL,LINC00189	-	A	0.256215	-31.7942	11.8148	0.007123	-45.7696	14.0433	0.001117	0.004382	0.005403	0.41736	-0.673722	0.348983	0.053541
8	117676559	rs10505282	intronic	EIF3H	T	C	0.217694	-41.2161	13.0182	0.001545	-46.595	15.5749	0.002774	-0.004508	0.005598	0.4206	-0.544405	0.364451	0.135237
17	77223703	rs191397528	intronic	RBFOX3	C	T	0.862787	-41.5697	15.004	0.005596	-49.6392	18.3474	0.00682	-0.005819	0.007259	0.422751	0.209569	0.454155	0.644477
10	66336801	rs75270511	intergenic	REEP3,ANXA2P3	C	T	0.649256	-32.285	11.2494	0.004105	-36.7529	13.558	0.006712	0.003999	0.005119	0.43471	0.599365	0.336076	0.074518
4	178821798	rs7688339	ncRNA_intronic	LINC01098,LINC01099	G	A	0.662083	-28.3393	10.7591	0.008439	-36.7615	13.4267	0.006182	-0.003592	0.004727	0.447299	0.075433	0.320329	0.813831
14	72628433	rs149674	intronic	RGS6	T	C	0.63572	-28.561	10.6528	0.007339	-37.6292	12.8203	0.003334	-0.0035	0.004725	0.458809	0.26009	0.318493	0.414141
10	109251240	rs2919759	intergenic	SORCS1,RNU6-53P	G	A	0.0591929	-56.3577	21.1003	0.007564	-91.6499	23.3125	8.4e-05	0.007039	0.009503	0.458849	0.976253	0.613399	0.111487
2	58564130	rs75942864	intergenic	FANCL,LINC01122	T	C	0.902325	-50.577	16.4168	0.002064	-65.8686	21.0033	0.001712	-0.005627	0.007765	0.468657	0.195026	0.505355	0.699556
18	73789264	rs2271152	intergenic	SMIM21,LOC339298	G	C	0.806158	-38.6968	13.1133	0.003168	-53.9773	15.9137	0.000694	0.004307	0.006	0.472834	-0.235105	0.392281	0.548955
10	101130302	rs1892511	intronic	CNNM1	T	A	0.600083	-32.9498	10.4597	0.001632	-34.8179	12.6879	0.006067	-0.003422	0.004776	0.473697	-0.091762	0.311822	0.768548
2	58744907	---	intergenic	FANCL,LINC01122	G	-	0.838094	-35.9838	13.6173	0.008229	-44.4495	17.0218	0.00902	-0.004467	0.006283	0.477141	0.278967	0.409887	0.496128
16	12184917	rs62038872	intronic	SNX29	T	G	0.155657	-42.0361	15.0943	0.005354	-49.9226	17.8081	0.005058	0.004703	0.006658	0.479957	0.092507	0.424748	0.82759
7	9089610	rs21424	intergenic	NXPH1,PER4	G	A	0.674605	-41.6479	10.8145	0.000118	-34.3749	12.9286	0.007842	-0.003359	0.004789	0.483126	0.040011	0.318253	0.899952
13	92072110	rs3848051	intronic	GPC5	A	G	0.360123	-32.8657	9.90415	0.000905	-33.0679	11.9453	0.005636	0.003271	0.004714	0.487726	-0.141526	0.30003	0.637136
10	100727706	rs11189910	intronic	HPSE2	C	T	0.353916	-27.21	10.5562	0.009948	-34.8616	12.7993	0.006455	-0.00324	0.004795	0.499237	-0.055269	0.320833	0.863227
21	30567222	rs67211015	ncRNA_intronic	LINC00189	A	G	0.258108	-31.4335	11.6798	0.007118	-46.0877	13.9254	0.000934	0.003608	0.005355	0.500401	-0.655834	0.348779	0.060058
22	43641737	rs17516862	intronic	SCUBE1	A	G	0.411969	-30.2118	10.045	0.002633	-32.4588	12.1118	0.007364	-0.003158	0.004758	0.506892	-0.039383	0.312899	0.899839
2	14040663	rs6432423	intergenic	LOC100506474,LINC00276	A	G	0.255547	-31.7723	11.8732	0.007451	-49.6303	14.0045	0.000394	-0.003359	0.005125	0.512282	0.103504	0.351989	0.768716
21	30608394	rs200437036	ncRNA_intronic	LINC00189	-	TGTC	0.334832	-28.757	11.0962	0.009553	-37.7472	13.0126	0.003721	0.003281	0.005071	0.517595	-0.618466	0.330491	0.061296
10	64724130	---	intergenic	EGR2,NRBF2	C	T	0.948865	-66.6671	25.2414	0.008262	-91.546	30.897	0.003047	0.007324	0.011431	0.521726	0.478236	0.757621	0.527888
22	43440253	rs34131658	intronic	TTLL1	-	CA	0.345763	-40.0922	10.4438	0.000124	-36.8124	12.7859	0.003988	0.003023	0.004727	0.522405	-0.120693	0.317467	0.703815
10	109402407	rs2168739	intergenic	SORCS1,RNU6-53P	A	G	0.123797	-46.8277	17.2581	0.00666	-51.2867	19.903	0.009971	-0.004291	0.006831	0.529872	0.349039	0.467779	0.455569
5	2447659	rs79115748	intergenic	LOC100506858,IRX2	A	T	0.867557	-45.8618	16.4324	0.005255	-62.1844	18.4158	0.000734	0.004197	0.006918	0.544057	1.1651	0.44652	0.009073
12	131495315	rs1151356	intronic	GPR133	G	A	0.207999	-33.5899	12.2722	0.006199	-42.7384	14.7938	0.003866	-0.003004	0.005448	0.581367	0.115017	0.362243	0.750855
3	137525203	rs16847489	intergenic	LINC01210,CLDN18	A	G	0.843023	-41.537	14.6372	0.004543	-44.6831	17.2165	0.009449	-0.003424	0.006235	0.582859	0.012739	0.418626	0.975724
8	137967674	rs13275024	intergenic	KHDRBS3,FAM135B	A	G	0.897556	-46.721	17.7394	0.008445	-55.7149	20.497	0.006564	-0.003769	0.007249	0.603163	0.638841	0.509697	0.210069
10	109201632	rs12571469	intergenic	SORCS1,RNU6-53P	A	G	0.0797915	-52.7743	19.1922	0.005964	-70.1768	21.5357	0.001119	0.00428	0.008251	0.603904	1.035	0.545698	0.057874
2	72317626	rs10175113	intergenic	DYSF,CYP26B1	A	T	0.670944	-30.7624	11.6022	0.008015	-35.3641	13.675	0.009708	-0.002518	0.004857	0.604067	0.009426	0.332427	0.977379
7	8681526	rs76132502	intronic	NXPH1	T	C	0.363466	-35.2192	10.9976	0.001363	-39.8342	13.2396	0.002624	0.002539	0.0049	0.604386	0.295292	0.330226	0.371208
17	12236611	---	intergenic	MAP2K4,LINC00670	T	C	0.942649	-54.3531	20.7862	0.008927	-83.1883	26.0949	0.001433	-0.005691	0.011579	0.623077	-0.517705	0.675931	0.443728
10	82519685	rs11186845	intergenic	SH2D4B,NRG3	A	G	0.839224	-38.6844	14.473	0.007521	-67.8631	17.1443	7.6e-05	0.003123	0.006377	0.624328	0.468965	0.414278	0.257633
1	858692	rs34628185	intergenic	LOC100130417,SAMD11	-	G	0.443507	-27.0056	10.2367	0.008337	-32.583	12.5727	0.009553	-0.00224	0.004607	0.626856	0.033526	0.313255	0.91477
12	131490720	rs4759825	intronic	GPR133	T	C	0.217873	-38.7311	13.0897	0.003087	-48.4929	15.2791	0.001505	-0.002772	0.005704	0.627031	0.138153	0.373422	0.711409
6	52125673	rs1266834	intergenic	IL17F,MCM3	T	G	0.0731283	-47.4055	17.9751	0.008357	-63.5735	22.4224	0.004579	-0.003231	0.007106	0.649384	0.177563	0.532136	0.738621
10	109138179	rs4636589	intergenic	SORCS1,RNU6-53P	C	T	0.0820636	-50.2043	18.7726	0.007488	-65.8972	21.2746	0.001952	0.0028	0.007768	0.718544	0.838483	0.531739	0.114825
13	46803693	rs34039230	intronic	LRRC63	A	C	0.234546	-38.8522	13.4093	0.003763	-44.6889	15.8139	0.004714	-0.001863	0.005456	0.732703	0.114194	0.365002	0.754389
21	16462613	rs2823050	intergenic	NRIP1,USP25	G	A	0.924324	-63.649	21.9347	0.003711	-73.6633	24.8182	0.002996	-0.002961	0.008914	0.739794	0.136032	0.604725	0.822019
7	107932915	rs759550	intronic	NRCAM	T	C	0.25505	-31.4216	11.6779	0.00713	-40.7759	14.066	0.003744	-0.001569	0.004994	0.753456	0.189195	0.342585	0.580772
3	63442622	rs1376478	ncRNA_intronic	SYNPR-AS1	G	A	0.640909	-33.8243	11.1827	0.002489	-35.1044	13.5821	0.00975	0.001523	0.00486	0.753974	0.180848	0.320736	0.572854
17	77232086	rs7223911	intronic	RBFOX3	G	T	0.518825	-26.6343	9.90461	0.007165	-33.5567	12.2095	0.005989	-0.001457	0.004666	0.754812	-0.200855	0.304713	0.509791
22	43461778	rs6003022	intronic	TTLL1	G	A	0.181636	-51.0057	13.3638	0.000135	-58.3993	15.5264	0.000169	-0.001811	0.005851	0.756927	-0.291008	0.395016	0.461305
13	46795918	rs59027411	intronic	LRRC63	-	G	0.233476	-38.8522	13.4093	0.003763	-43.1271	15.6647	0.005903	-0.001674	0.005447	0.758609	0.143667	0.363876	0.692973
22	43518275	rs742134	intronic	BIK	A	G	0.216329	-58.1814	13.4203	1.5e-05	-41.4944	15.4156	0.007109	0.001638	0.005513	0.766416	-0.424837	0.374665	0.256832
12	131047868	rs4759727	intergenic	RIMBP2,STX2	G	C	0.281842	-32.4228	11.7275	0.005698	-40.8571	13.762	0.002989	-0.001586	0.005377	0.767949	0.287306	0.344211	0.403898
18	74391057	rs4891187	intergenic	LOC101927651,LOC400661	C	G	0.547185	-31.6876	10.3637	0.002232	-50.1692	12.6476	7.3e-05	-0.001338	0.004661	0.774114	0.081766	0.298182	0.783919
9	136934924	rs2427977	intergenic	BRD3,WDR5	G	A	0.716292	-36.2452	11.8836	0.002288	-38.7171	14.6411	0.008183	-0.0014	0.005058	0.781967	-0.051745	0.347257	0.881546
22	43465814	rs2076155	exonic	TTLL1	G	A	0.181867	-51.0057	13.3638	0.000135	-57.5071	15.5185	0.000211	-0.001501	0.005843	0.797297	-0.281895	0.394762	0.475173
7	8720903	rs11769942	intronic	NXPH1	C	T	0.441255	-28.469	10.4393	0.00639	-45.0046	12.4172	0.00029	0.001175	0.004614	0.798934	-0.102288	0.313892	0.744522
22	42924905	rs11432855	intergenic	RRP7A,SERHL2	-	G	0.140416	-34.6908	13.2978	0.009087	-41.8473	16.2445	0.009993	0.001608	0.006679	0.809731	-0.395656	0.417437	0.34322
12	132878216	rs28744578	intronic	GALNT9	G	A	0.780582	-34.9726	12.955	0.006943	-49.1711	15.4022	0.001411	0.001206	0.005317	0.820532	0.367477	0.368427	0.318559
18	74346279	rs11874188	ncRNA_intronic	LOC101927651	G	T	0.444608	-39.675	11.1235	0.000361	-43.2471	13.2079	0.001059	-0.001064	0.004692	0.820549	0.447932	0.314143	0.153901
8	137747692	rs4909606	intergenic	KHDRBS3,FAM135B	A	G	0.917134	-50.5668	19.2515	0.008623	-82.7484	23.2588	0.000374	-0.00185	0.008212	0.821736	0.255469	0.592037	0.666098
15	100458069	rs2573613	intergenic	DNM1P46,ADAMTS17	A	C	0.273201	-36.3286	11.9417	0.002349	-36.6958	14.1083	0.009295	0.001119	0.005091	0.826002	0.194714	0.347373	0.575117
19	49307999	rs837642	intronic	BCAT2	A	G	0.845299	-51.1917	15.6185	0.001047	-53.534	18.3202	0.003476	0.001313	0.006169	0.831457	-0.317705	0.439141	0.469391
19	8942353	rs2910367	intergenic	ZNF558,MBD3L1	G	A	0.931873	-54.2911	19.7868	0.006073	-67.8504	25.0298	0.006712	-0.001382	0.007899	0.861082	0.465384	0.578519	0.421142
2	177679372	rs1513881	intergenic	LOC102724224,HNRNPA3	A	G	0.764171	-34.4854	11.7466	0.003327	-44.4327	14.7395	0.002574	0.000887	0.005241	0.865608	-0.052445	0.354944	0.882535
7	8685245	rs141786370	intronic	NXPH1	CTT	-	0.372565	-29.4514	10.9232	0.007013	-38.2101	13.1463	0.003655	0.000796	0.004748	0.866808	0.178274	0.324625	0.58289
3	75463915	rs144851442	intergenic	MIR4444-1,FAM86DP	C	A	0.915309	-59.4612	19.3634	0.002135	-73.188	22.9187	0.001406	0.001265	0.008652	0.883776	-0.732943	0.56273	0.192753
4	153610164	rs6857876	intergenic	TMEM154,TIGD4	A	G	0.578167	-29.4417	10.5425	0.005228	-34.0653	12.8478	0.008014	0.000627	0.004617	0.891984	-0.040861	0.315646	0.896999
6	53119116	rs186902008	intergenic	GCM1,ELOVL5	A	G	0.110577	-46.6613	17.4625	0.007538	-67.5089	20.778	0.001158	0.001027	0.00826	0.901016	-0.266619	0.521405	0.609108
10	109387366	rs1583897	intergenic	SORCS1,RNU6-53P	T	C	0.149733	-44.4207	15.6253	0.004471	-47.1591	18.2669	0.009832	-0.000795	0.006408	0.901315	0.366055	0.433909	0.398881
15	99623827	rs35037038	intergenic	PGPEP1L,SYNM	-	C	0.410805	-28.921	10.2638	0.004836	-31.6891	12.2758	0.00984	0.000578	0.004671	0.901437	-0.157518	0.303734	0.604037
5	123151508	rs255244	intergenic	CSNK1G3,ZNF608	A	G	0.594126	-26.9628	10.2368	0.008441	-35.1969	12.1768	0.003846	-0.000533	0.004632	0.908421	0.380375	0.313109	0.224431
22	43473662	rs5759143	intronic	TTLL1	T	C	0.232487	-48.5394	11.9938	5.2e-05	-44.3319	14.0877	0.00165	-0.000517	0.005164	0.920186	-0.435066	0.355543	0.221078
20	17524058	rs201929	intronic	BFSP1	G	A	0.394892	-29.363	11.0061	0.007633	-36.1458	13.136	0.005929	-0.000468	0.00482	0.922583	-0.512925	0.315305	0.103789
1	872352	rs1806780	intronic	SAMD11	G	C	0.475007	-29.0745	10.1241	0.004081	-38.5813	12.3247	0.001746	-0.000403	0.004574	0.929832	0.040334	0.306498	0.895302
9	136832577	rs111168476	intronic	VAV2	C	T	0.507087	-25.8638	9.93442	0.009229	-36.2951	12.4815	0.003639	-0.000401	0.00458	0.930275	-0.145078	0.301457	0.630336
12	131492437	rs67779220	intronic	GPR133	-	ATC	0.189845	-36.7235	13.2831	0.005698	-46.9475	15.7094	0.002803	0.000399	0.005694	0.944137	0.056426	0.382518	0.882727
22	43505695	rs4988366	intergenic	TTLL1,BIK	G	A	0.209746	-50.9844	12.9477	8.2e-05	-51.4707	15.1357	0.000672	-0.000345	0.005528	0.950243	-0.596172	0.375637	0.112491
7	8998943	rs180829136	intergenic	NXPH1,PER4	G	A	0.855592	-44.1649	15.5773	0.00458	-49.9233	18.5128	0.007003	-0.000296	0.006976	0.966121	0.329605	0.453625	0.46747
4	13022635	rs12504391	intergenic	HS3ST1,RAB28	T	C	0.799332	-38.3671	13.4448	0.004322	-43.8762	16.13	0.006525	-0.000185	0.005517	0.973184	0.545304	0.383802	0.155376
1	109793851	rs149311467	exonic	CELSR2	G	T	0.804702	-40.0992	13.0903	0.002189	-46.5204	15.675	0.002999	0.000178	0.006323	0.977492	0.500521	0.389346	0.198603
13	92072346	rs12561118	intronic	GPC5	C	T	0.135052	-54.9651	15.1175	0.000277	-47.7537	17.2874	0.005739	-0.000168	0.006774	0.980167	-0.338711	0.447773	0.449388
18	74369096	rs75018831	intergenic	LOC101927651,LOC400661	-	TCT	0.445486	-36.6016	11.0294	0.000905	-39.9236	13.1164	0.002336	0.000109	0.004739	0.981702	0.467524	0.311299	0.133136
